# Supplementary material
Source: PubMed Central journal article supplement (PMC6508549)
Supplement: NIHMS1019289-supplement-supplemental.pdf [file NIHMS1019289-supplement-supplemental.pdf]

# Rate-Driving Force Relationships in the Multisite PCET Activation of Ketones

Guanqi Qiu and Robert R. Knowles\*

*Department of Chemistry, Princeton University, Princeton, NJ 08544, USA*

## Supporting Information

| <b>Table of Contents</b> .....                                                          | <b>Page</b> |
|-----------------------------------------------------------------------------------------|-------------|
| 1. General Information .....                                                            | S2          |
| 2. Extended Description of Experimental Method for Obtaining $K_A$ and $k_{PCET}$ ..... | S3          |
| 3. Computational Evaluation of Ketyl O–H Bond Dissociation Free Energy .....            | S7          |
| 4. Independent Verification of the Method in Different Systems Reported .....           | S20         |
| 5. Generation of Data Points in the Main Rate-Driving Force Correlation .....           | S35         |
| 6. Brønsted Slopes of Bulkier Ketone-Acid Adduct.....                                   | S125        |
| 7. Miscellaneous Rate-Driving Force Correlation Plots .....                             | S151        |
| 8. H/D Kinetic Isotope Effects .....                                                    | S157        |
| 9. References .....                                                                     | S161        |

## 1. General Information

Commercial reagents were purified prior to use following the guidelines of Perrin and Armarego.<sup>1</sup> All solvents were purified and stored according to the method of Grubbs.<sup>2</sup> All luminescence quantities were measured using steady-state Stern–Volmer experiments on an Agilent Cary Eclipse fluorescence spectrophotometer. Stern–Volmer fluorescence quenching experiments were run with freshly prepared  $3 \times 10^{-6}$  M solutions of Ir(III) photocatalyst in acetonitrile at ambient temperature (22–24 °C) under an argon atmosphere. All solutions were degassed with argon before luminescence measurement. The irradiation and emission wavelengths depend on the specific photocatalyst used. In all Stern–Volmer experiments, the fluorescence intensity was measured three times for each sample. Time-resolved luminescence experiments were used qualitatively to identify the nature (static or dynamic) of the relevant steady-state quenching experiments. These experiments were conducted using time-correlated single-photon counting with Horiba DeltaFlex.

## 2. Extended Description of Experimental Method for Obtaining $K_A$ and $k_{PCET}$

### 2.1. Supplementary Explanation of the Experimental Method

$S_0$  and  $A_0$  are the initial concentrations used to prepare the solutions for luminescence quenching measurements. In a typical set of Stern-Volmer experiments, we keep the initial ketone concentration constant and vary the initial acid concentration to obtain a value for  $k_{obs}$  using equation 2. For the values used in key equation 8,  $S_0$  is the initial ketone concentration, and we take  $A_0$  as the average value of all the initial acid concentrations that lead to the corresponding  $k_{obs}$ . Conceptually, this average value can be thought of as an approximation for the point of tangency with equation 5. For example, in a luminescence quenching experiment in which the initial ketone concentration is fixed at 0.050M and the initial acid concentration is varied at 0.0010, 0.0015, 0.0020, 0.0025, 0.0030 M,  $S_0 = 0.050$  M,  $A_0 = 0.0020$  M, and the slope from equation 2 gives the corresponding  $k_{obs}$  for  $S_0 = 0.050$  M,  $A_0 = 0.0020$  M. In practice, if the chosen value of  $S_0$  is significantly higher than  $A_0$ , the range of  $A_0$  can be broader. If  $S_0$  and  $A_0$  are similar,  $\Delta A_0/A_0$  needs to be small. More generally, the key is that  $\Delta A_0/(S_0 + A_0)$  should be kept small. Whether appropriate intervals of  $A_0$  around the average value  $A_0$  were chosen is assessed by the linearity of the plot of equation 2. If curvature is observed within one quenching data set, we would reduce the interval of variance in the  $A_0$ .

It is important to note that the magnitude of  $x$  should not be insignificant with respect to  $A_0$  and  $S_0$ , otherwise equation 3a will collapse into  $K_A = x/S_0A_0$  so that  $k_{obs}$  will be constant and curvature will not be captured. As seen in the main text Figure 2c, the four different slopes indicate that the variation in  $x$  as a result of the variation in  $A_0$  displays four different sensitivities (as reflected in each value of  $k_{obs}$ ). Thus  $x/S_0A_0$  appears to be constant within each linear Stern-Volmer quenching data set, but it is not a constant between any two of the four linear data sets. The fact that four different slopes are obtained rather than a single slope for all four data sets indicates that  $x$  is not negligible compared to  $A_0$ .

When the changes in the concentration for either the acid or ketone become too large, the resulting changes in  $I_0/I$  should deviate from linearity. This is observed experimentally. In Figure S.2.1.1, data are presented for the PCET activation of ketone **1** with *p*-TsOH and photoreductant **7**. At a fixed  $A_0 = 0.003$ M, we varied the  $S_0$  over between 0.040 and 0.104M. Indeed, non-linear quenching behavior was observed. Notably, the ketone alone does not quench the luminescence of **7** under these conditions. As such, this

behavior can be taken as a evidence of the reaction occurring through a H-bond complex of the ketone & acid.

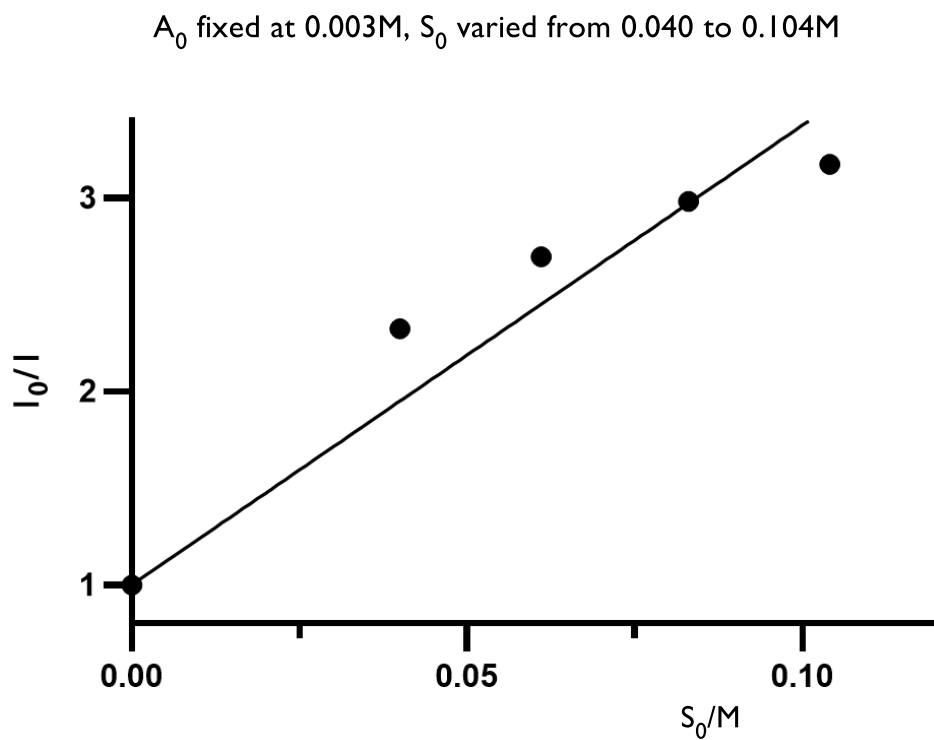

**Figure S.2.1.1.** Non-linear luminescence quenching data for fixed  $[p\text{-TsOH}]_0$  and varying  $[\text{ketone } \mathbf{1}]_0$  from 13 to 35 equivalence

## 2.2. Treatment of Competitive non-PCET Quenching

In all equations below,  $I_0$  is the luminescence intensity in the absence of any quencher and  $I$  is the luminescence intensity in the presence of a quencher.

As mentioned in the main text, some ketones and acids undergo non-PCET luminescence quenching in the presence of the \*Ir (III)-based photoreductant. The luminescence intensity relationships are defined by equations S1a and S1b as follows:

$$\frac{I_0}{I} = 1 + k'_{SV}S_0 \quad (S1a)$$

$$\frac{I_0}{I} = 1 + k''_{SV}A_0 \quad (S1b)$$

Although the effect of this non-PCET quenching is significantly smaller than that of PCET quenching, it is important to consider in some cases to obtain precise values of  $K_A$  and  $k_{PCET}$  owing to the wide concentration ranges examined for both species. We took the non-PCET quenching into account in all cases. The results show that non-PCET quenching is insignificant compared to the PCET quenching in most cases. Moreover, the non-PCET rate constant (if there was one) is very small compared to the PCET rate constant, in all cases.

The nature of non-PCET quenching by each ketone or acid was determined qualitatively using time-resolved luminescence experiments. A constant lifetime of the excited-state \*Ir(III) luminescence, regardless of the quencher concentration, suggests static quenching, whereas a decreasing lifetime with increasing concentration of the quencher indicates dynamic quenching.

If the non-PCET luminescence quenching by both ketone and acid was found to be dynamic, equation 2 in the main text is modified to equation S2,

$$\frac{I_0}{I} = 1 + k'_{SV}S_0 + k''_{SV}A_0 + k_{obs}\tau_0S_0A_0 \quad (S2)$$

and equation 4 in the main text is modified to equation S3.

$$\frac{I_0}{I} = 1 + k'_{SV}S_0 + k''_{SV}A_0 + k_{PCET}\tau_0(x) \quad (S3)$$

A linear plot leads to the second order rate constant  $k_{obs}\tau_0$  by equation S4a.

$$\frac{I_0}{I(1+k'_{SV}S_0)} = 1 + \frac{(k''_{SV}+k_{obs}\tau_0S_0)A_0}{1+k'_{SV}S_0} \quad (S4a)$$

$k'_{SV}$  and  $k''_{SV}$  are obtained by independent Stern–Volmer analysis of the steady-state luminescence quenching according to equation S1a or S1b. According to equation S4a, for each combination of ketone and acid concentrations, the concentration of ketone is held constant and the concentration of acid is varied. The term  $\frac{I_0}{I(1+k'_{SV}S_0)}$  is extrapolated from the luminescence intensity changes upon variation in the concentration of acid. The slope is  $\frac{k''_{SV}+k_{obs}\tau_0S_0}{1+k'_{SV}S_0}$  and the  $k_{obs\,SV}$  could be calculated accordingly. It is equally viable to keep the concentration of acid constant and vary the concentration of ketone. The linear Stern–Volmer plot becomes equation S4b,

$$\frac{I_0}{I(1+k''_{SV}A_0)} = 1 + \frac{(k'_{SV}+k_{obs}\tau_0A_0)S_0}{1+k''_{SV}A_0} \quad (S4b)$$

and the slope is given by  $\frac{k'_{SV}+k_{obs}\tau_0A_0}{1+k''_{SV}A_0}$ .

If the non-PCET luminescence quenching by ketone was found to be static and that by acid was dynamic, equation 2 in the main text is modified to equation S5.

$$\frac{I_0}{I(1+k'_{SV}S_0)} = 1 + (k''_{SV} + k_{obs}\tau_0S_0)A_0 \quad (S5)$$

As shown in equation S5, the concentration of ketone is held constant, while that of the acid is varied. The Stern–Volmer slope gives  $(k''_{SV} + k_{obs}\tau_0S_0)$ , and  $k_{obs\,SV}$  is then known.

The  $k_{obs\,SV}$  obtained from equations S4a, S4b, or S5 is then substituted into equation 3a from the main text, just as that from equation 2 is substituted into equation 3a. Whatever modification for equation 2 is required, the identical modification must be made for equation 4, as well, leading to equations 6 and 7, and thus equation 8 anyway. For example, if the non-PCET quenching by ketone is static and that by acid is dynamic:

$$\begin{aligned} \frac{I_0}{I} &= (1 + k''_{SV}A_0 + k_{obs}\tau_0S_0A_0)(1 + k'_{SV}S_0) \\ &= (1 + k''_{SV}A_0 + k_{PCET}\tau_0(x))(1 + k'_{SV}S_0) \\ k_{obs}\tau_0S_0A_0 &= k_{PCET}\tau_0(x) \end{aligned}$$

An identical expression to the scenario in which there is no non-PCET quenching, is obtained.

### 3. Computational Evaluation of Ketyl O–H Bond Dissociation Free Energy

All calculations were performed using DFT at the UB3LYP/6-311+G(d,p) level of theory as implemented in the *Gaussian 16* suite.<sup>3</sup> Frequency calculations were performed at the same level of theory in order to derive thermal corrections at 295 K. Acetonitrile solvent was simulated using the CPCM model.

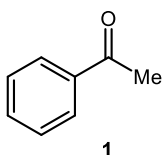

Charge = 0 Multiplicity = 1

Symbolic Z-Matrix:

|   |         |          |          |
|---|---------|----------|----------|
| C | 0.54078 | -2.34584 | 0.60141  |
| C | 1.12287 | -3.03074 | -0.47376 |
| C | 1.9058  | -2.33612 | -1.40567 |
| C | 2.10663 | -0.95661 | -1.2624  |
| C | 1.52453 | -0.27171 | -0.18723 |
| C | 0.74161 | -0.96633 | 0.74468  |
| H | 0.96954 | -4.08403 | -0.58315 |
| H | 2.35024 | -2.85906 | -2.22659 |
| H | 1.67787 | 0.78158  | -0.07784 |
| H | 0.29716 | -0.44339 | 1.5656   |
| C | 2.96698 | -0.19329 | -2.28648 |
| O | 3.14732 | 1.04546  | -2.15783 |
| C | 3.60665 | -0.94592 | -3.46799 |
| H | 4.57635 | -1.29777 | -3.18376 |
| H | 2.98994 | -1.778   | -3.73672 |
| H | 3.6981  | -0.28493 | -4.30443 |
| H | -0.057  | -2.8762  | 1.31295  |

|                                              |             |
|----------------------------------------------|-------------|
| Sum of electronic and zero-point Energies=   | -384.872161 |
| Sum of electronic and thermal Energies=      | -384.864261 |
| Sum of electronic and thermal Enthalpies=    | -384.863316 |
| Sum of electronic and thermal Free Energies= | -384.905171 |

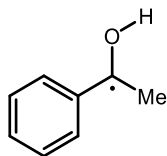

**1-ethyl**

Charge = 0 Multiplicity = 2

Symbolic Z-Matrix:

|   |          |          |          |
|---|----------|----------|----------|
| C | 1.51036  | -2.37982 | -0.04072 |
| C | 2.23289  | -1.17941 | -0.07087 |
| C | 1.55477  | 0.04697  | -0.06285 |
| C | 0.15413  | 0.07295  | -0.02467 |
| C | -0.56839 | -1.12745 | 0.00549  |
| H | 2.02812  | -3.31619 | -0.04684 |
| H | 3.3023   | -1.19925 | -0.10003 |
| H | -0.36362 | 1.00932  | -0.01854 |
| H | -1.63781 | -1.10762 | 0.03464  |
| C | 2.34876  | 1.3661   | -0.09599 |
| C | 3.88361  | 1.35457  | 0.0293   |
| H | 4.1661   | 0.80366  | 0.90199  |
| H | 4.30873  | 0.89268  | -0.83721 |
| H | 4.24241  | 2.35937  | 0.11015  |
| O | 1.66311  | 2.61018  | 0.06847  |
| H | 2.30358  | 3.32224  | 0.13453  |
| C | 0.10972  | -2.35384 | -0.00253 |
| H | -0.44194 | -3.27037 | 0.02049  |

|                                              |             |
|----------------------------------------------|-------------|
| Sum of electronic and zero-point Energies=   | -385.426592 |
| Sum of electronic and thermal Energies=      | -385.417889 |
| Sum of electronic and thermal Enthalpies=    | -385.416944 |
| Sum of electronic and thermal Free Energies= | -385.461103 |

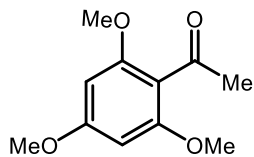

**2**

Charge = 0 Multiplicity = 1

Symbolic Z-Matrix:

|   |         |          |          |
|---|---------|----------|----------|
| C | 0.11387 | -2.35208 | 0.09911  |
| C | 1.50746 | -2.36044 | -0.04844 |
| C | 2.22134 | -1.15465 | -0.02935 |
| C | 1.54163 | 0.0595   | 0.13729  |
| C | 0.14805 | 0.06786  | 0.28484  |



|   |          |          |          |
|---|----------|----------|----------|
| C | -0.56583 | -1.13793 | 0.26574  |
| H | 2.02643  | -3.28747 | -0.17567 |
| H | -1.62987 | -1.13155 | 0.3784   |
| C | 2.32612  | 1.38455  | 0.15827  |
| O | 1.71577  | 2.4748   | 0.3079   |
| C | 3.85753  | 1.37536  | -0.00387 |
| H | 4.31764  | 1.29498  | 0.9588   |
| H | 4.14719  | 0.54136  | -0.60839 |
| H | 4.17179  | 2.28337  | -0.47469 |
| O | -0.61458 | -3.58248 | 0.07963  |
| C | -0.99829 | -3.88803 | -1.26361 |
| H | -1.54336 | -4.80868 | -1.27819 |
| H | -1.61556 | -3.10201 | -1.64578 |
| H | -0.12308 | -3.98204 | -1.87195 |
| O | -0.54553 | 1.30678  | 0.45488  |
| O | 3.64337  | -1.16317 | -0.17991 |
| C | 4.03048  | -2.27777 | -0.9878  |
| H | 5.09452  | -2.28416 | -1.10046 |
| H | 3.71622  | -3.18578 | -0.51699 |
| H | 3.57038  | -2.19739 | -1.95048 |
| C | -1.86092 | 1.19606  | -0.09503 |
| H | -2.37989 | 2.12309  | 0.0322   |
| H | -1.79336 | 0.9653   | -1.13767 |
| H | -2.39375 | 0.41693  | 0.4089   |

Sum of electronic and zero-point Energies= -728.442637  
Sum of electronic and thermal Energies= -728.426545  
Sum of electronic and thermal Enthalpies= -728.425601  
Sum of electronic and thermal Free Energies= -728.486297

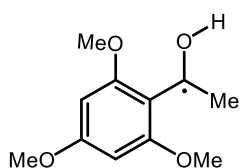

**2-ketyl**

Charge = 0 Multiplicity = 2

Symbolic Z-Matrix:

|   |          |          |         |
|---|----------|----------|---------|
| C | 0.12376  | -2.32588 | 0.47287 |
| C | 1.5045   | -2.35494 | 0.23492 |
| C | 2.20602  | -1.15873 | 0.03275 |
| C | 1.52679  | 0.06654  | 0.06853 |
| C | 0.14604  | 0.0956   | 0.30649 |
| C | -0.55547 | -1.10061 | 0.50866 |
| H | 2.02311  | -3.29046 | 0.2076  |
| H | -1.6097  | -1.07842 | 0.69034 |

|   |          |          |          |
|---|----------|----------|----------|
| C | 2.29769  | 1.38106  | -0.15363 |
| C | 3.83464  | 1.37573  | -0.25024 |
| H | 4.24389  | 0.87566  | 0.6026   |
| H | 4.13424  | 0.86457  | -1.14123 |
| H | 4.19369  | 2.38328  | -0.27923 |
| O | 1.63337  | 2.63299  | 0.03677  |
| H | 2.27123  | 3.34725  | -0.03073 |
| O | -0.59208 | -3.54651 | 0.67917  |
| C | 0.04506  | -4.60122 | -0.04645 |
| H | 1.05121  | -4.71497 | 0.29945  |
| H | -0.49056 | -5.51456 | 0.10791  |
| H | 0.05129  | -4.36334 | -1.08965 |
| O | -0.54705 | 1.34588  | 0.343    |
| O | 3.61494  | -1.18838 | -0.21006 |
| C | -1.89484 | 1.15673  | -0.09583 |
| H | -2.38528 | 0.45808  | 0.54935  |
| H | -2.41345 | 2.09225  | -0.06851 |
| H | -1.89429 | 0.77833  | -1.09668 |
| C | 3.95872  | -2.40754 | -0.87367 |
| H | 5.01295  | -2.42973 | -1.05535 |
| H | 3.68544  | -3.23842 | -0.25734 |
| H | 3.43499  | -2.4667  | -1.80486 |

Sum of electronic and zero-point Energies= -728.986829  
Sum of electronic and thermal Energies= -728.970217  
Sum of electronic and thermal Enthalpies= -728.969273  
Sum of electronic and thermal Free Energies= -729.031085

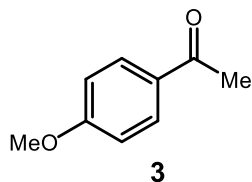

Charge = 0 Multiplicity = 1

Symbolic Z-Matrix:

|   |          |          |          |
|---|----------|----------|----------|
| C | 0.09998  | -2.35935 | -0.01704 |
| C | 1.50061  | -2.37922 | -0.05915 |
| C | 2.21951  | -1.17652 | -0.03428 |
| C | 1.53778  | 0.04606  | 0.0327   |
| C | 0.13715  | 0.06593  | 0.07481  |
| C | -0.58175 | -1.13677 | 0.04994  |
| H | 2.02112  | -3.31268 | -0.11029 |

|   |          |          |          |
|---|----------|----------|----------|
| H | 3.28891  | -1.19169 | -0.06643 |
| H | -0.38336 | 0.99939  | 0.12595  |
| H | -1.65116 | -1.1216  | 0.08209  |
| C | 2.32777  | 1.3677   | 0.06003  |
| O | 1.71561  | 2.46552  | 0.12017  |
| C | 3.86692  | 1.34587  | 0.01375  |
| H | 4.25314  | 1.3022   | 1.01066  |
| H | 4.19514  | 0.48719  | -0.53384 |
| H | 4.2219   | 2.23304  | -0.46772 |
| O | -0.63359 | -3.58659 | -0.04241 |
| C | -0.91787 | -3.94407 | -1.39751 |
| H | -1.46676 | -4.86236 | -1.41649 |
| H | -1.49927 | -3.17148 | -1.85573 |
| H | -0.00028 | -4.06586 | -1.93426 |

|                                              |             |
|----------------------------------------------|-------------|
| Sum of electronic and zero-point Energies=   | -499.400819 |
| Sum of electronic and thermal Energies=      | -499.390302 |
| Sum of electronic and thermal Enthalpies=    | -499.389358 |
| Sum of electronic and thermal Free Energies= | -499.437269 |

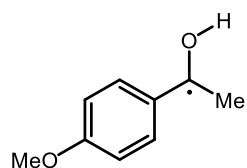

**3-ketyl**

Charge = 0 Multiplicity = 2

Symbolic Z-Matrix:

|   |          |          |          |
|---|----------|----------|----------|
| C | 0.09467  | -2.37422 | 0.38475  |
| C | 1.49232  | -2.40816 | 0.28814  |
| C | 2.21086  | -1.21956 | 0.10145  |
| C | 1.53174  | 0.00298  | 0.01136  |
| C | 0.13409  | 0.03692  | 0.10797  |
| C | -0.58445 | -1.15168 | 0.29466  |
| H | 2.01084  | -3.34159 | 0.35693  |
| H | 3.278    | -1.24547 | 0.02769  |
| H | -0.38444 | 0.97036  | 0.03918  |
| H | -1.65159 | -1.12577 | 0.36842  |
| C | 2.32134  | 1.30914  | -0.1938  |
| C | 3.86023  | 1.30621  | -0.13538 |
| H | 4.18165  | 0.84837  | 0.77674  |
| H | 4.24767  | 0.75533  | -0.96683 |
| H | 4.22059  | 2.31291  | -0.17545 |
| O | 1.64153  | 2.5656   | -0.12997 |
| H | 2.28311  | 3.27878  | -0.1666  |
| O | -0.63853 | -3.58708 | 0.57525  |

|   |          |          |          |
|---|----------|----------|----------|
| C | 0.06803  | -4.67167 | -0.03248 |
| H | 1.03432  | -4.76461 | 0.41756  |
| H | -0.48059 | -5.57919 | 0.11006  |
| H | 0.17903  | -4.48276 | -1.07981 |

|                                              |             |
|----------------------------------------------|-------------|
| Sum of electronic and zero-point Energies=   | -499.951558 |
| Sum of electronic and thermal Energies=      | -499.940169 |
| Sum of electronic and thermal Enthalpies=    | -499.939225 |
| Sum of electronic and thermal Free Energies= | -499.9895   |

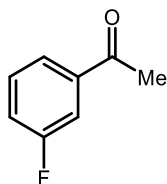

Charge = 0 Multiplicity = 1

Symbolic Z-Matrix:

|   |         |          |          |
|---|---------|----------|----------|
| C | 0.54078 | -2.34584 | 0.60141  |
| C | 1.12287 | -3.03074 | -0.47376 |
| C | 1.9058  | -2.33612 | -1.40567 |
| C | 2.10663 | -0.95661 | -1.2624  |
| C | 1.52453 | -0.27171 | -0.18723 |
| C | 0.74161 | -0.96633 | 0.74468  |
| H | 2.35024 | -2.85906 | -2.22659 |
| H | 1.67787 | 0.78158  | -0.07784 |
| H | 0.29716 | -0.44339 | 1.5656   |
| C | 2.96698 | -0.19329 | -2.28648 |
| O | 3.14732 | 1.04546  | -2.15783 |
| C | 3.60665 | -0.94592 | -3.46799 |
| H | 4.57635 | -1.29777 | -3.18376 |
| H | 2.98994 | -1.778   | -3.73672 |
| H | 3.6981  | -0.28493 | -4.30443 |
| H | -0.057  | -2.8762  | 1.31295  |
| F | 0.92941 | -4.35966 | -0.61177 |

|                                              |             |
|----------------------------------------------|-------------|
| Sum of electronic and zero-point Energies=   | -484.148613 |
| Sum of electronic and thermal Energies=      | -484.139862 |
| Sum of electronic and thermal Enthalpies=    | -484.138917 |
| Sum of electronic and thermal Free Energies= | -484.183068 |

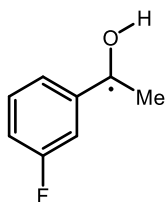

**4-ketyl**

Charge = 0 Multiplicity = 2

Symbolic Z-Matrix:

|   |          |          |          |
|---|----------|----------|----------|
| C | 1.51036  | -2.37982 | -0.04072 |
| C | 2.23289  | -1.17941 | -0.07087 |
| C | 1.55477  | 0.04697  | -0.06285 |
| C | 0.15413  | 0.07295  | -0.02467 |
| C | -0.56839 | -1.12745 | 0.00549  |
| H | 3.3023   | -1.19925 | -0.10003 |
| H | -0.36362 | 1.00932  | -0.01854 |
| H | -1.63781 | -1.10762 | 0.03464  |
| C | 2.34876  | 1.3661   | -0.09599 |
| C | 3.88361  | 1.35457  | 0.0293   |
| H | 4.1661   | 0.80366  | 0.90199  |
| H | 4.30873  | 0.89268  | -0.83721 |
| H | 4.24241  | 2.35937  | 0.11015  |
| O | 1.66311  | 2.61018  | 0.06847  |
| H | 2.30358  | 3.32224  | 0.13453  |
| C | 0.10972  | -2.35384 | -0.00253 |
| H | -0.44194 | -3.27037 | 0.02049  |
| F | 2.1636   | -3.56122 | -0.04844 |

|                                              |             |
|----------------------------------------------|-------------|
| Sum of electronic and zero-point Energies=   | -484.705222 |
| Sum of electronic and thermal Energies=      | -484.695777 |
| Sum of electronic and thermal Enthalpies=    | -484.694832 |
| Sum of electronic and thermal Free Energies= | -484.740631 |

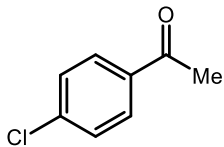

**5**

Charge = 0 Multiplicity = 1

Symbolic Z-Matrix:

|   |         |          |         |
|---|---------|----------|---------|
| C | 0.14756 | -2.34229 | 0.00168 |
| C | 1.54272 | -2.34229 | 0.00168 |
| C | 2.24026 | -1.13454 | 0.00168 |
| C | 1.54261 | 0.07397  | 0.00048 |
| C | 0.14778 | 0.07389  | 0.      |

|    |          |          |          |
|----|----------|----------|----------|
| C  | -0.54982 | -1.13431 | 0.001    |
| H  | 2.09223  | -3.2948  | 0.00299  |
| H  | 3.33994  | -1.13446 | 0.00231  |
| H  | -0.40234 | 1.02617  | -0.00095 |
| H  | -1.64942 | -1.13413 | 0.00082  |
| C  | 2.31311  | 1.40736  | 0.0004   |
| O  | 1.74159  | 2.49348  | -0.00064 |
| C  | 3.84842  | 1.28729  | 0.00175  |
| H  | 4.16395  | 0.7571   | 0.87596  |
| H  | 4.16541  | 0.75614  | -0.87134 |
| H  | 4.28266  | 2.26522  | 0.00158  |
| Cl | -0.73236 | -3.86654 | 0.0024   |

|                                              |             |
|----------------------------------------------|-------------|
| Sum of electronic and zero-point Energies=   | -844.504516 |
| Sum of electronic and thermal Energies=      | -844.495379 |
| Sum of electronic and thermal Enthalpies=    | -844.494435 |
| Sum of electronic and thermal Free Energies= | -844.539859 |

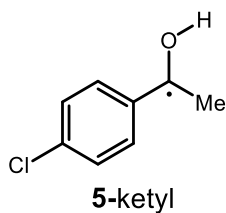

Charge = 0 Multiplicity = 2

Symbolic Z-Matrix:

|    |          |          |          |
|----|----------|----------|----------|
| C  | 0.10972  | -2.35384 | -0.00254 |
| C  | 1.51037  | -2.37982 | -0.04047 |
| C  | 2.2329   | -1.17942 | -0.07065 |
| C  | 1.55478  | 0.04696  | -0.06291 |
| C  | 0.15414  | 0.07295  | -0.02499 |
| C  | -0.56839 | -1.12745 | 0.0052   |
| H  | 2.02813  | -3.3162  | -0.04638 |
| H  | 3.30232  | -1.19926 | -0.09961 |
| H  | -0.36362 | 1.00932  | -0.01908 |
| H  | -1.63782 | -1.10761 | 0.03415  |
| C  | 2.34877  | 1.36608  | -0.09607 |
| C  | 3.8836   | 1.35458  | 0.0295   |
| H  | 4.16593  | 0.80378  | 0.90232  |
| H  | 4.30889  | 0.89258  | -0.83686 |
| H  | 4.24239  | 2.35939  | 0.11029  |
| O  | 1.6631   | 2.61019  | 0.06811  |
| H  | 2.30355  | 3.32226  | 0.13419  |
| Cl | -0.79769 | -3.86141 | 0.03537  |

|                                            |             |
|--------------------------------------------|-------------|
| Sum of electronic and zero-point Energies= | -845.060397 |
| Sum of electronic and thermal Energies=    | -845.050404 |

Sum of electronic and thermal Enthalpies= -845.049459  
 Sum of electronic and thermal Free Energies= -845.097809

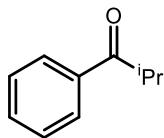

**10**

Charge = 0 Multiplicity = 1  
 Symbolic Z-Matrix:

|   |          |          |          |
|---|----------|----------|----------|
| C | 1.51036  | -2.37982 | -0.04072 |
| C | 2.23289  | -1.17941 | -0.07087 |
| C | 1.55477  | 0.04697  | -0.06285 |
| C | 0.15413  | 0.07295  | -0.02467 |
| C | -0.56839 | -1.12745 | 0.00549  |
| H | 2.02812  | -3.31619 | -0.04684 |
| H | 3.3023   | -1.19925 | -0.10003 |
| H | -0.36362 | 1.00932  | -0.01854 |
| H | -1.63781 | -1.10762 | 0.03464  |
| C | 2.34876  | 1.3661   | -0.09599 |
| C | 3.88361  | 1.35457  | 0.0293   |
| O | 1.66311  | 2.61018  | 0.06847  |
| C | 0.10972  | -2.35384 | -0.00253 |
| H | -0.44194 | -3.27037 | 0.02049  |
| C | 4.29019  | 0.56167  | 1.28532  |
| H | 3.46996  | 0.53605  | 1.97196  |
| H | 4.55348  | -0.43732 | 1.00676  |
| H | 5.12961  | 1.03538  | 1.74994  |
| C | 4.49547  | 0.6898   | -1.21782 |
| H | 4.72031  | -0.33387 | -1.00227 |
| H | 3.79712  | 0.73883  | -2.02701 |
| H | 5.39411  | 1.20253  | -1.49067 |
| H | 4.24241  | 2.35937  | 0.11015  |

Sum of electronic and zero-point Energies= -463.456820  
 Sum of electronic and thermal Energies= -463.446216  
 Sum of electronic and thermal Enthalpies= -463.445272  
 Sum of electronic and thermal Free Energies= -463.493536

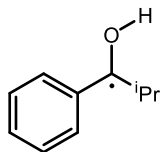

**10-ketyl**

Charge = 0 Multiplicity = 2

Symbolic Z-Matrix:

|   |          |          |          |
|---|----------|----------|----------|
| C | 1.51036  | -2.37982 | -0.04072 |
| C | 2.23289  | -1.17941 | -0.07087 |
| C | 1.55477  | 0.04697  | -0.06285 |
| C | 0.15413  | 0.07295  | -0.02467 |
| C | -0.56839 | -1.12745 | 0.00549  |
| H | 2.02812  | -3.31619 | -0.04684 |
| H | 3.3023   | -1.19925 | -0.10003 |
| H | -0.36362 | 1.00932  | -0.01854 |
| H | -1.63781 | -1.10762 | 0.03464  |
| C | 2.34876  | 1.3661   | -0.09599 |
| C | 3.88361  | 1.35457  | 0.0293   |
| O | 1.66311  | 2.61018  | 0.06847  |
| H | 2.30358  | 3.32224  | 0.13453  |
| C | 0.10972  | -2.35384 | -0.00253 |
| H | -0.44194 | -3.27037 | 0.02049  |
| C | 4.29019  | 0.56167  | 1.28532  |
| H | 3.46996  | 0.53605  | 1.97196  |
| H | 4.55348  | -0.43732 | 1.00676  |
| H | 5.12961  | 1.03538  | 1.74994  |
| C | 4.49547  | 0.6898   | -1.21782 |
| H | 4.72031  | -0.33387 | -1.00227 |
| H | 3.79712  | 0.73883  | -2.02701 |
| H | 5.39411  | 1.20253  | -1.49067 |
| H | 4.24241  | 2.35937  | 0.11015  |

|                                              |             |
|----------------------------------------------|-------------|
| Sum of electronic and zero-point Energies=   | -464.012300 |
| Sum of electronic and thermal Energies=      | -464.001135 |
| Sum of electronic and thermal Enthalpies=    | -464.000191 |
| Sum of electronic and thermal Free Energies= | -464.049617 |



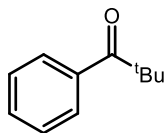

**11**

Charge = 0 Multiplicity = 1

Symbolic Z-Matrix:

|   |          |          |          |
|---|----------|----------|----------|
| C | 1.51036  | -2.37982 | -0.04072 |
| C | 2.23289  | -1.17941 | -0.07087 |
| C | 1.55477  | 0.04697  | -0.06285 |
| C | 0.15413  | 0.07295  | -0.02467 |
| C | -0.56839 | -1.12745 | 0.00549  |
| H | 2.02812  | -3.31619 | -0.04684 |
| H | 3.3023   | -1.19925 | -0.10003 |
| H | -0.36362 | 1.00932  | -0.01854 |
| H | -1.63781 | -1.10762 | 0.03464  |
| C | 2.34876  | 1.3661   | -0.09599 |
| C | 3.88361  | 1.35457  | 0.0293   |
| O | 1.66311  | 2.61018  | 0.06847  |
| C | 0.10972  | -2.35384 | -0.00253 |
| H | -0.44194 | -3.27037 | 0.02049  |
| C | 4.40002  | 2.80073  | 0.14567  |
| H | 5.46959  | 2.7962   | 0.17561  |
| H | 4.06928  | 3.3667   | -0.70002 |
| H | 4.01999  | 3.2441   | 1.04228  |
| C | 4.29019  | 0.56167  | 1.28532  |
| H | 3.46996  | 0.53605  | 1.97196  |
| H | 4.55348  | -0.43732 | 1.00676  |
| H | 5.12961  | 1.03538  | 1.74994  |
| C | 4.49547  | 0.6898   | -1.21782 |
| H | 4.72031  | -0.33387 | -1.00227 |
| H | 3.79712  | 0.73883  | -2.02701 |
| H | 5.39411  | 1.20253  | -1.49067 |

Sum of electronic and zero-point Energies= -502.751192

Sum of electronic and thermal Energies= -502.739189

Sum of electronic and thermal Enthalpies= -502.738245

Sum of electronic and thermal Free Energies= -502.789261

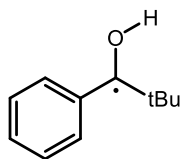

**11-ketyl**

Charge = 0 Multiplicity = 2

Symbolic Z-Matrix:

|   |          |          |          |
|---|----------|----------|----------|
| C | 1.51036  | -2.37982 | -0.04072 |
| C | 2.23289  | -1.17941 | -0.07087 |
| C | 1.55477  | 0.04697  | -0.06285 |
| C | 0.15413  | 0.07295  | -0.02467 |
| C | -0.56839 | -1.12745 | 0.00549  |
| H | 2.02812  | -3.31619 | -0.04684 |
| H | 3.3023   | -1.19925 | -0.10003 |
| H | -0.36362 | 1.00932  | -0.01854 |
| H | -1.63781 | -1.10762 | 0.03464  |
| C | 2.34876  | 1.3661   | -0.09599 |
| C | 3.88361  | 1.35457  | 0.0293   |
| O | 1.66311  | 2.61018  | 0.06847  |
| H | 2.30358  | 3.32224  | 0.13453  |
| C | 0.10972  | -2.35384 | -0.00253 |
| H | -0.44194 | -3.27037 | 0.02049  |
| C | 4.40002  | 2.80073  | 0.14567  |
| H | 5.46959  | 2.7962   | 0.17561  |
| H | 4.06928  | 3.3667   | -0.70002 |
| H | 4.01999  | 3.2441   | 1.04228  |
| C | 4.29019  | 0.56167  | 1.28532  |
| H | 3.46996  | 0.53605  | 1.97196  |
| H | 4.55348  | -0.43732 | 1.00676  |
| H | 5.12961  | 1.03538  | 1.74994  |
| C | 4.49547  | 0.6898   | -1.21782 |
| H | 4.72031  | -0.33387 | -1.00227 |
| H | 3.79712  | 0.73883  | -2.02701 |
| H | 5.39411  | 1.20253  | -1.49067 |

|                                              |             |
|----------------------------------------------|-------------|
| Sum of electronic and zero-point Energies=   | -503.303927 |
| Sum of electronic and thermal Energies=      | -503.291543 |
| Sum of electronic and thermal Enthalpies=    | -503.290598 |
| Sum of electronic and thermal Free Energies= | -503.342278 |

### Hydrogen Atom

Charge = 0 Multiplicity = 2

Symbolic Z-Matrix:

|   |         |          |         |
|---|---------|----------|---------|
| H | 0.22062 | -0.15394 | 1.12464 |
|---|---------|----------|---------|

|                                              |           |
|----------------------------------------------|-----------|
| Sum of electronic and zero-point Energies=   | -0.502177 |
| Sum of electronic and thermal Energies=      | -0.500761 |
| Sum of electronic and thermal Enthalpies=    | -0.499817 |
| Sum of electronic and thermal Free Energies= | -0.512831 |

**Scheme S1. Thermochemistry of BDFE<sub>O-H</sub>**

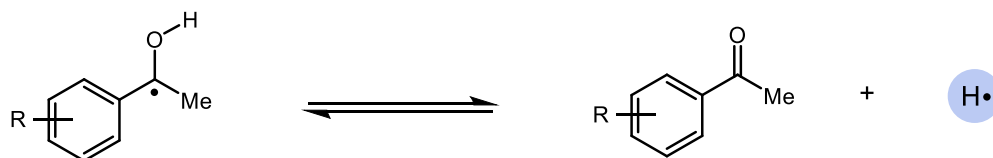

$$\text{BDFE}_{\text{O-H}} = \Delta G^\circ(\text{ketone}) + \Delta G^\circ(\text{H atom}) - \Delta G^\circ(\text{ketyl})$$

**Table S1. Calculation of BDFE<sub>O-H</sub>**

|                                  | $\Delta G^\circ(\text{ketyl})$ | $\Delta G^\circ(\text{ketone})$ | $\Delta G^\circ(\text{H}\cdot)$ | BDFE (au) | BDFE (kcal/mol) |
|----------------------------------|--------------------------------|---------------------------------|---------------------------------|-----------|-----------------|
| PhCOMe                           | -385.461103                    | -384.905171                     | -0.512831                       | 0.043101  | 27.0            |
| 2,4,6-(OMe) <sub>3</sub> -PhCOMe | -729.031085                    | -728.486297                     | -0.512831                       | 0.034318  | 21.5            |
| p-OMe-PhCOMe                     | -499.989588                    | -499.437269                     | -0.512831                       | 0.039488  | 24.8            |
| m-F-PhCOMe                       | -484.740631                    | -484.183068                     | -0.512831                       | 0.047093  | 29.6            |
| p-Cl-PhCOMe                      | -845.097809                    | -844.539859                     | -0.512831                       | 0.045119  | 28.3            |
| PhCOiPr                          | -464.049617                    | -463.493536                     | -0.512831                       | 0.04325   | 27.1            |
| PhCO <sup>t</sup> Bu             | -503.342278                    | -502.789261                     | -0.512831                       | 0.040186  | 25.2            |

#### 4. Independent Verification of the Method in Different Systems Reported

**4.1.** Wenger measured the equilibrium constant ( $K_A$ ) for hydrogen bonding between pyridine and phenol in MeCN *via* NMR titration.<sup>4</sup> As verification of the accuracy of our method, we measured the  $K_A$  of 4-chlorophenol and pyridine in MeCN using  $[\text{Ir}(\text{dF}(\text{CF}_3)\text{ppy})_2(\text{dtbbpy})]\text{PF}_6$  as the photooxidant. The solution was irradiated at 375 nm, and fluorescence was measured at 475nm. Neither the phenol nor pyridine alone quenched the luminescence of  $^*\text{Ir}(\text{III})$ . Initial pyridine concentration is denoted as  $A_0$ . Initial phenol concentration is denoted as  $S_0$ .

1. For this experiment,  $A_0$  is fixed at 0.151 M, while  $S_0$  is varied from 0.0050 to 0.0300 M.

**Table S4.1.1.** Luminescence quenching data with  $[\text{Ir}(\text{dF}(\text{CF}_3)\text{ppy})_2(\text{dtbbpy})]\text{PF}_6$ , 0.151 M pyridine, and variable [4-chlorophenol]. See **Figure S4.1.1.**

| $S_0/\text{M}$ | $S_0A_0/\text{M}^2$ | I/au 1 | I/au 2 | I/au 3 | I/au avg. | $I_0/I$  |
|----------------|---------------------|--------|--------|--------|-----------|----------|
| 0              | 0                   |        |        |        |           | 1        |
| 0.004938       | 0.000748            | 979    | 979    | 979    | 979       | 1.109295 |
| 0.009877       | 0.001495            | 905    | 905    | 900    | 903.3333  | 1.202214 |
| 0.014815       | 0.002243            | 824    | 821    | 820    | 821.6667  | 1.321704 |
| 0.019753       | 0.002991            | 767    | 767    | 767    | 767       | 1.415906 |
| 0.024691       | 0.003738            | 714    | 714    | 710    | 712.6667  | 1.523854 |
| 0.029630       | 0.004486            | 659    | 662    | 662    | 661       | 1.642965 |

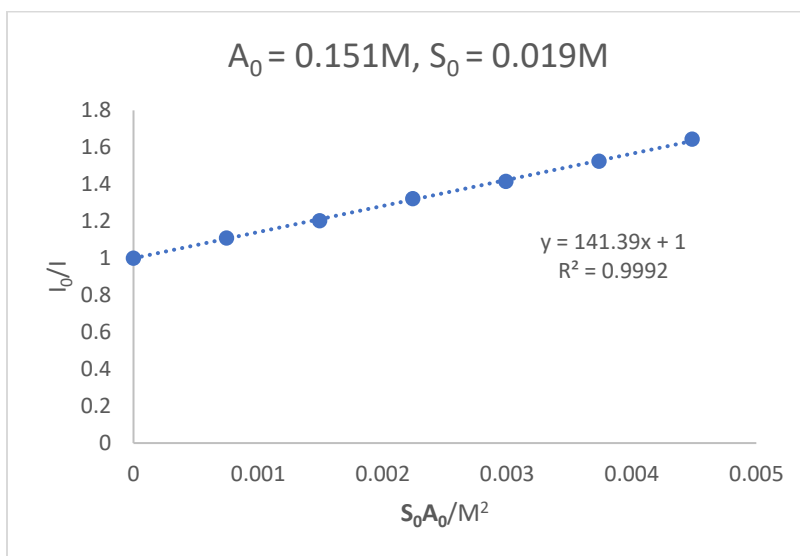

**Figure S4.1.1.** Stern-Volmer plot of luminescence data in **Table S4.1.1.**

$I_0$  was extrapolated from the six data points.

The linear Stern–Volmer quenching equation is:

$$\frac{I_0}{I} = 1 + k_{obs} \tau_0 S_0 A_0$$

$$k_{obs} \tau_0 = 141.4$$

2. For this experiment,  $A_0$  fixed at 0.296 M, while  $S_0$  is varied from 0.010 to 0.030 M.

**Table S4.1.2.** Luminescence quenching data with  $[\text{Ir}(\text{dF}(\text{CF}_3)\text{ppy})_2(\text{dtbbpy})]\text{PF}_6$ , 0.296 M pyridine, and variable [4-chlorophenol]. See **Figure S4.1.2.**

| $S_0/\text{M}$ | $S_0 A_0/\text{M}^2$ | I/au 1 | I/au 2 | I/au 3 | I/au avg. | $I_0/I$  |
|----------------|----------------------|--------|--------|--------|-----------|----------|
| 0              | 0                    |        |        |        |           | 1        |
| 0.009756       | 0.002884             | 894    | 895    | 893    | 894       | 1.353468 |
| 0.014634       | 0.004326             | 789    | 792    | 790    | 790.3333  | 1.531    |
| 0.019512       | 0.005768             | 714    | 714    | 716    | 714.6667  | 1.693097 |
| 0.02439        | 0.00721              | 647    | 647    | 647    | 647       | 1.87017  |
| 0.029268       | 0.008652             | 590    | 588    | 588    | 588.6667  | 2.055493 |

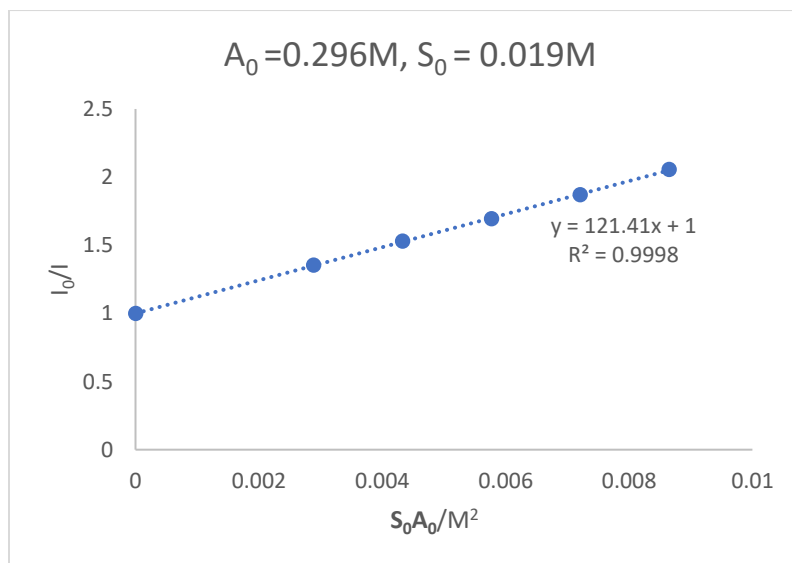

**Figure S4.1.2.** Stern-Volmer plot of luminescence data in **Table S4.1.2.**

$I_0$  was extrapolated from the five data points.

The linear Stern–Volmer quenching equation is:

$$\frac{I_0}{I} = 1 + k_{obs}\tau_0 S_0A_0$$

$$k_{obs}\tau_0 = 121.4$$

3. For this experiment,  $A_0$  fixed at 0.449 M, while  $S_0$  is varied from 0.010 to 0.030 M.

**Table S4.1.3.** Luminescence quenching data with  $[\text{Ir}(\text{dF}(\text{CF}_3)\text{ppy})_2(\text{dtbbpy})]\text{PF}_6$ , 0.4487 M pyridine, and variable [4-chlorophenol]. See **Figure S4.1.3**.

| $S_0/\text{M}$ | $S_0A_0/\text{M}^2$ | I/au 1 | I/au 2 | I/au 3 | I/au avg. | $I_0/I$  |
|----------------|---------------------|--------|--------|--------|-----------|----------|
| 0              | 0                   |        |        |        |           | 1        |
| 0.009639       | 0.004325            | 990    | 990    | 988    | 989.3333  | 1.453504 |
| 0.014458       | 0.006487            | 857    | 843    | 853    | 851       | 1.689777 |
| 0.019277       | 0.00865             | 755    | 755    | 756    | 755.3333  | 1.903795 |
| 0.024096       | 0.010812            | 674    | 672    | 672    | 672.6667  | 2.13776  |
| 0.028916       | 0.012974            | 610    | 602    | 599    | 603.6667  | 2.382109 |

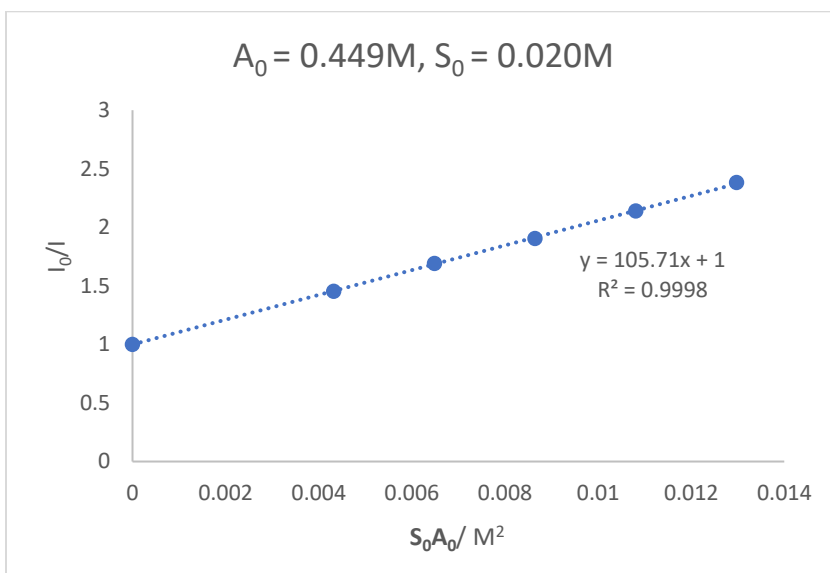

**Figure S4.1.3.** Stern-Volmer plot of luminescence data in **Table S4.1.3**.

$I_0$  was extrapolated from the five data points.

The linear Stern–Volmer quenching equation is:

$$\frac{I_0}{I} = 1 + k_{obs}\tau_0 S_0A_0$$

$$k_{obs} \tau_0 = 105.7$$

4. For this experiment,  $A_0$  fixed at 0.591 M, while  $S_0$  is varied from 0.010 to 0.030 M.

**Table S4.1.4.** Luminescence quenching data with  $[\text{Ir}(\text{dF}(\text{CF}_3)\text{ppy})_2(\text{dtbbpy})]\text{PF}_6$ , 0.591 M pyridine, and variable [4-chlorophenol]. See **Figure S4.1.4.**

| $S_0/\text{M}$ | $S_0A_0/\text{M}^2$ | I/au 1 | I/au 2 | I/au 3 | I/au avg. | $I_0/I$  |
|----------------|---------------------|--------|--------|--------|-----------|----------|
| 0              | 0                   |        |        |        |           | 1        |
| 0.009524       | 0.00563             | 950    | 950    | 950    | 950       | 1.527368 |
| 0.014286       | 0.008445            | 803    | 805    | 803    | 803.6667  | 1.805475 |
| 0.019048       | 0.01126             | 704    | 704    | 702    | 703.3333  | 2.063033 |
| 0.02381        | 0.014075            | 627    | 622    | 625    | 624.6667  | 2.322839 |
| 0.028571       | 0.016891            | 561    | 560    | 560    | 560.3333  | 2.58953  |

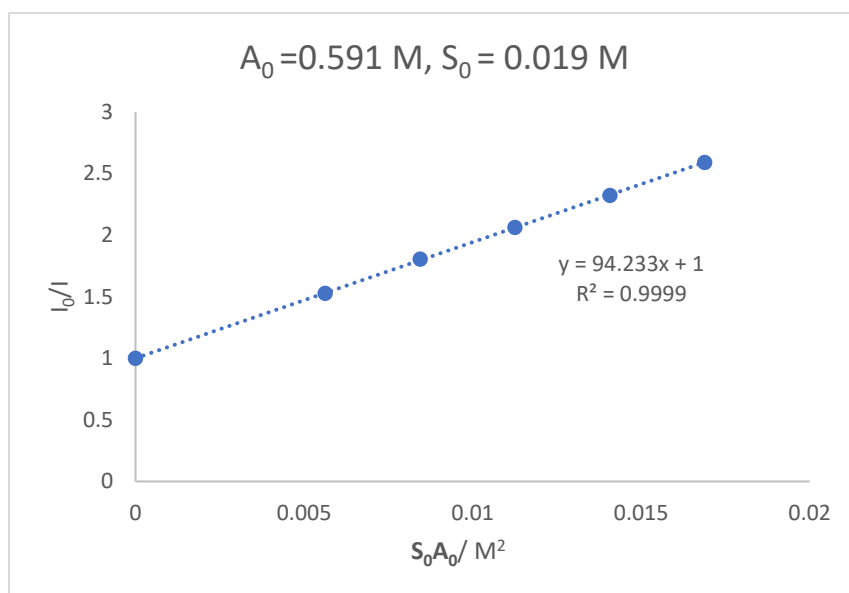

**Figure S4.1.4.** Stern-Volmer plot of luminescence data in **Table S4.1.4.**

$I_0$  was extrapolated from the five data points.

The linear Stern–Volmer quenching equation is:

$$\frac{I_0}{I} = 1 + k_{obs}\tau_0 S_0A_0$$

$$k_{obs} \tau_0 = 94.2$$

$$S_0 + A_0 = \frac{S_0A_0 k_{obs} \tau_0}{k_{PCET}\tau_0} + \frac{k_{PCET}\tau_0}{k_{obs}\tau_0} - \frac{1}{K_A} \quad (8)$$

**Table S4.1.5.** Luminescence quenching data of **Figure 4.1.1-4.1.4**

|          | <b>A<sub>0</sub> (M)</b> | <b>S<sub>0</sub> (M)</b> | <b>S<sub>0</sub>A<sub>0</sub> (M<sup>2</sup>)</b> | <b>S<sub>0</sub>+A<sub>0</sub> (M)</b> | <b>k<sub>obs</sub>τ<sub>0</sub></b> |
|----------|--------------------------|--------------------------|---------------------------------------------------|----------------------------------------|-------------------------------------|
| <b>1</b> | 0.151                    | 0.019                    | 0.00288                                           | 0.170                                  | 141                                 |
| <b>2</b> | 0.296                    | 0.019                    | 0.00562                                           | 0.315                                  | 121                                 |
| <b>3</b> | 0.449                    | 0.019                    | 0.00853                                           | 0.468                                  | 106                                 |
| <b>4</b> | 0.591                    | 0.019                    | 0.0112                                            | 0.610                                  | 94.2                                |

**Table S4.1.6.** Six sets of values of  $K_A$  obtained, upon substituting the Information of any two experiments shown in **Table S4.1.5** into equation 8

| <b>into equation 8</b> | <b><math>K_A/M^{-1}</math></b> |
|------------------------|--------------------------------|
| <b>1&amp;2</b>         | 1.45                           |
| <b>1&amp;3</b>         | 1.43                           |
| <b>1&amp;4</b>         | 1.43                           |
| <b>2&amp;3</b>         | 1.41                           |
| <b>2&amp;4</b>         | 1.42                           |
| <b>3&amp;4</b>         | 1.44                           |
| <b>average</b>         | 1.4±0.1                        |

This value of  $K_A$  is within the error reported by Wenger (1.5±0.1 M<sup>-1</sup>).<sup>4</sup>



**4.2.** Wenger measured the equilibrium constant ( $K_A$ ) for hydrogen bonding between pyridine and phenol in MeCN *via* NMR titration.<sup>4</sup> As verification of the accuracy of our method, we measured the  $K_A$  of 4-methylphenol and pyridine in MeCN using  $[\text{Ir}(\text{dF}(\text{CF}_3)\text{ppy})_2(\text{dtbbpy})]\text{PF}_6$  as the photooxidant. The solution was irradiated at 375 nm, and fluorescence was measured at 475nm. Neither the phenol nor pyridine alone quenched the luminescence of  $^*\text{Ir}(\text{III})$ .

1. For this experiment,  $A_0$  fixed at 0.303 M, while  $S_0$  is varied from 0.030 to 0.160 M.

**Table S4.2.1.** Luminescence quenching data with  $[\text{Ir}(\text{dF}(\text{CF}_3)\text{ppy})_2(\text{dtbbpy})]\text{PF}_6$ , 0.303 M pyridine, and variable [4-chlorophenol]. See **Figure S4.2.1**.

| $S_0/\text{M}$ | $S_0A_0/\text{M}^2$ | I/au 1 | I/au 2 | I/au 3 | I/au avg. | $I_0/I$  |
|----------------|---------------------|--------|--------|--------|-----------|----------|
| 0              | 0                   |        |        |        |           | 1        |
| 0.026488       | 0.007999            | 158    | 159    | 158    | 158.3333  | 2.576842 |
| 0.052976       | 0.015999            | 98     | 98     | 98     | 98        | 4.163265 |
| 0.079463       | 0.023998            | 69     | 69     | 69     | 69        | 5.913043 |
| 0.105951       | 0.031997            | 53.8   | 53.8   | 53.9   | 53.83333  | 7.578947 |
| 0.132439       | 0.039997            | 44.3   | 44.2   | 44.2   | 44.23333  | 9.223813 |
| 0.158927       | 0.047996            | 37.6   | 37.5   | 37.5   | 37.53333  | 10.87034 |

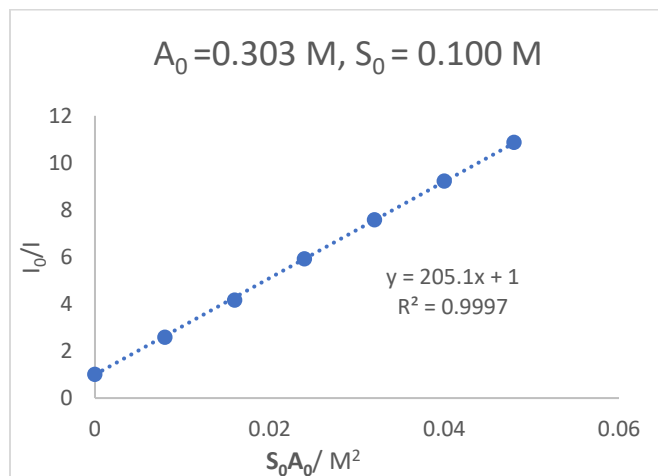

**Figure S4.2.1.** Stern-Volmer plot of luminescence data in **Table S4.2.1**.

$I_0$  was extrapolated from the six data points.

The linear Stern–Volmer quenching equation is:

$$\frac{I_0}{I} = 1 + k_{obs}\tau_0 S_0A_0$$

$$k_{obs}\tau_0 = 205.1$$

2. For this experiment,  $A_0$  fixed at 0.449 M, while  $S_0$  is varied from 0.030 to 0.160 M.

**Table S4.2.2.** Luminescence quenching data with  $[\text{Ir}(\text{dF}(\text{CF}_3)\text{ppy})_2(\text{dtbbpy})]\text{PF}_6$ , 0.449 M pyridine, and variable [4-chlorophenol]. See **Figure S4.2.2.**

| $S_0/\text{M}$ | $S_0A_0/\text{M}^2$ | I/au 1 | I/au 2 | I/au 3 | I/au avg. | $I_0/I$  |
|----------------|---------------------|--------|--------|--------|-----------|----------|
| 0              | 0                   |        |        |        |           | 1        |
| 0.026169       | 0.011742            | 130    | 129    | 129    | 129.3333  | 3.023196 |
| 0.052337       | 0.023485            | 75     | 75     | 75.1   | 75.03333  | 5.211017 |
| 0.078506       | 0.035227            | 51.9   | 51.8   | 52.1   | 51.93333  | 7.528883 |
| 0.104675       | 0.04697             | 40.3   | 40.3   | 40.4   | 40.33333  | 9.694215 |
| 0.130843       | 0.058712            | 32.9   | 32.5   | 33     | 32.8      | 11.92073 |
| 0.157012       | 0.070454            | 27.6   | 27.6   | 27.7   | 27.63333  | 14.14958 |

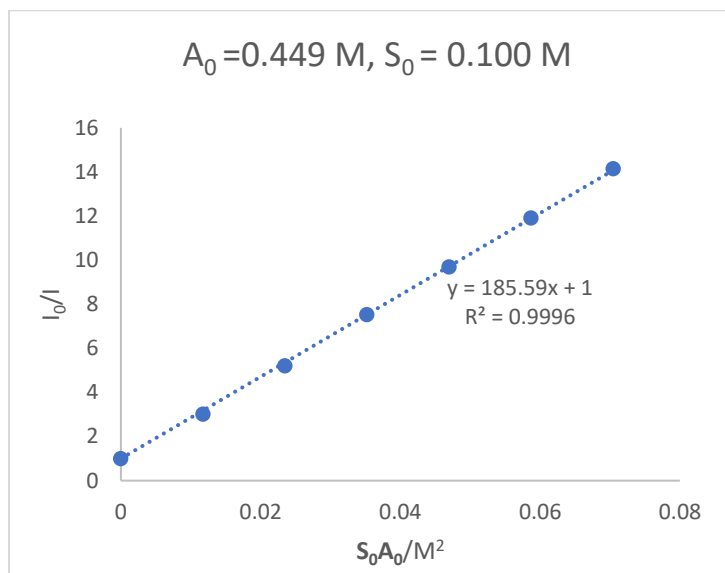

**Figure S4.2.2.** Stern-Volmer plot of luminescence data in **Table S4.2.2.**

$I_0$  was extrapolated from the six data points.

The linear Stern–Volmer quenching equation is:

$$\frac{I_0}{I} = 1 + k_{obs}\tau_0 S_0A_0$$

$$k_{obs} \tau_0 = 185.6$$

3. For this experiment,  $A_0$  fixed at 0.591 M, while  $S_0$  is varied from 0.030 to 0.160 M.

**Table S4.2.3.** Luminescence quenching data with  $[\text{Ir}(\text{dF}(\text{CF}_3)\text{ppy})_2(\text{dtbbpy})]\text{PF}_6$ , 0.591 M pyridine, and variable [4-chlorophenol]. See **Figure S4.2.3.**

| $S_0/\text{M}$ | $S_0A_0/\text{M}^2$ | $I/\text{au 1}$ | $I/\text{au 2}$ | $I/\text{au 3}$ | $I/\text{au avg.}$ | $I_0/I$  |
|----------------|---------------------|-----------------|-----------------|-----------------|--------------------|----------|
| 0              | 0                   |                 |                 |                 | 0                  | 1        |
| 0.025857       | 0.015286            | 111             | 111             | 111             | 111                | 3.414414 |
| 0.051714       | 0.030572            | 62.4            | 62.4            | 62.4            | 62.4               | 6.073718 |
| 0.077571       | 0.045858            | 43              | 43.6            | 43              | 43.2               | 8.773148 |
| 0.103429       | 0.061144            | 33.4            | 33.4            | 33.4            | 33.4               | 11.34731 |
| 0.129286       | 0.07643             | 27              | 27              | 26.9            | 26.97              | 14.05439 |
| 0.155143       | 0.091716            | 22.7            | 22.7            | 22.7            | 22.7               | 16.69604 |

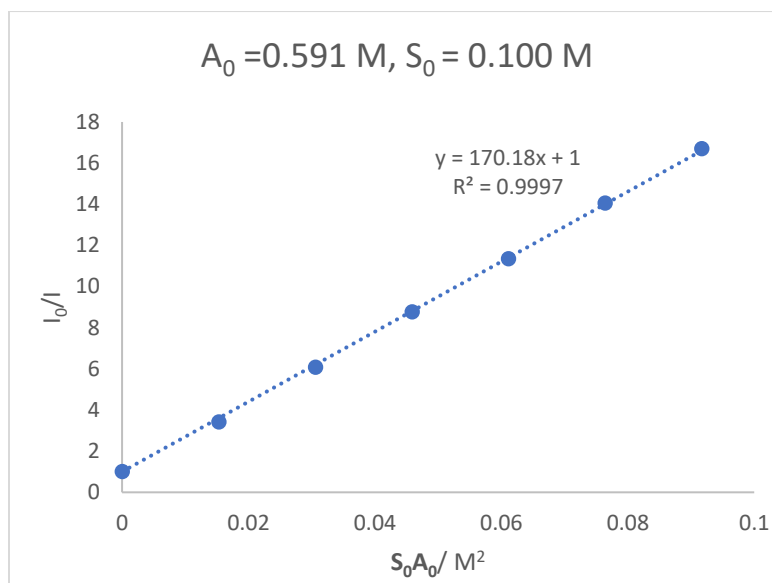

**Figure S4.2.3.** Stern-Volmer plot of luminescence data in **Table S4.2.3.**

$I_0$  was extrapolated from the six data points.

The linear Stern–Volmer quenching equation is:

$$\frac{I_0}{I} = 1 + k_{obs}\tau_0 S_0A_0$$

$$k_{obs} \tau_0 = 170.2$$

4. For this experiment,  $A_0$  fixed at 0.730 M, while  $S_0$  is varied from 0.030 to 0.160 M.

**Table S4.2.4.** Luminescence quenching data with  $[\text{Ir}(\text{dF}(\text{CF}_3)\text{ppy})_2(\text{dtbbpy})]\text{PF}_6$ , 0.730 M pyridine, and variable [4-chlorophenol]. See **Figure S4.2.4.**

| $S_0/\text{M}$ | $S_0A_0/\text{M}^2$ | I/au 1 | I/au 2 | I/au 3 | I/au avg. | $I_0/I$  |
|----------------|---------------------|--------|--------|--------|-----------|----------|
| 0              | 0                   |        |        |        |           | 1        |
| 0.025553       | 0.018661            | 101    | 100    | 100    | 100.3333  | 3.747508 |
| 0.051106       | 0.037321            | 55     | 55     | 55     | 55        | 6.836364 |
| 0.076659       | 0.055982            | 38.4   | 38.7   | 38.2   | 38.43333  | 9.783174 |
| 0.102212       | 0.074642            | 29.5   | 29.6   | 29.3   | 29.46667  | 12.76018 |
| 0.127765       | 0.093303            | 24.1   | 23.9   | 24     | 24        | 15.66667 |
| 0.153318       | 0.111963            | 20.3   | 20.3   | 20.2   | 20.26667  | 18.55263 |

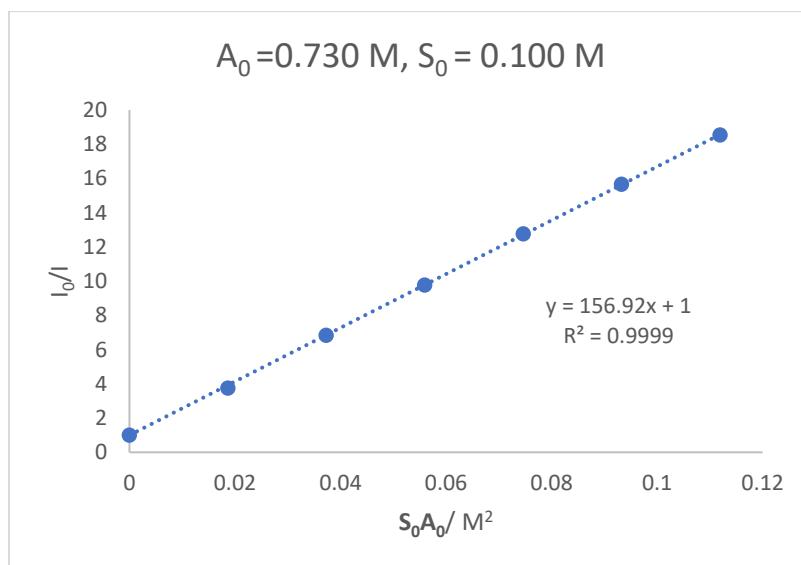

**Figure S4.2.4.** Stern-Volmer plot of luminescence data in **Table S4.2.4.**

$I_0$  was extrapolated from the six data points.

The linear Stern–Volmer quenching equation is:

$$\frac{I_0}{I} = 1 + k_{obs}\tau_0 S_0A_0$$

$$k_{obs} \tau_0 = 156.9$$

$$S_0 + A_0 = \frac{S_0 A k_{obs} \tau_0}{k_{PCET} \tau_0} + \frac{k_{PCET} \tau_0}{k_{obs} \tau_0} - \frac{1}{K_A} \quad (8)$$

**Table S4.2.5.** Luminescence quenching data of **Figure 4.2.1-4.2.4**

|          | <b>A<sub>0</sub> (M)</b> | <b>S<sub>0</sub> (M)</b> | <b>S<sub>0</sub>A<sub>0</sub> (M<sup>2</sup>)</b> | <b>S<sub>0</sub>+A<sub>0</sub> (M)</b> | <b>k<sub>obs</sub>τ<sub>0</sub></b> |
|----------|--------------------------|--------------------------|---------------------------------------------------|----------------------------------------|-------------------------------------|
| <b>1</b> | 0.303                    | 0.104                    | 0.0315                                            | 0.407                                  | 205                                 |
| <b>2</b> | 0.449                    | 0.104                    | 0.0467                                            | 0.553                                  | 186                                 |
| <b>3</b> | 0.591                    | 0.104                    | 0.0615                                            | 0.695                                  | 170                                 |
| <b>4</b> | 0.730                    | 0.104                    | 0.0760                                            | 0.834                                  | 157                                 |

**Table S4.2.6.** Six sets of values of  $K_A$  obtained, upon substituting the Information of any two experiments shown in **Table S4.2.5** into equation 8

| <b>into equation 8</b> | <b>K<sub>A</sub>/M<sup>-1</sup></b> |
|------------------------|-------------------------------------|
| <b>1&amp;2</b>         | 1.09                                |
| <b>1&amp;3</b>         | 1.06                                |
| <b>1&amp;4</b>         | 1.07                                |
| <b>2&amp;3</b>         | 1.03                                |
| <b>2&amp;4</b>         | 1.06                                |
| <b>3&amp;4</b>         | 1.09                                |
| <b>average</b>         | <b>1.1±0.1</b>                      |

This value of  $K_A$  is within the error reported by Wenger (1.1±0.1 M<sup>-1</sup>).<sup>4</sup>

**4.3.** Linschitz measured the equilibrium constant ( $K_A$ ) for hydrogen bonding between pyridine and phenol in PhCN *via* spectroscopic methods and saturation kinetics.<sup>5</sup> As verification of the accuracy of our method, we measured the  $K_A$  of 4-methylphenol and pyridine in PhCN using  $[\text{Ir}(\text{dF}(\text{CF}_3)\text{ppy})_2(\text{dtbbpy})]\text{PF}_6$  as the photooxidant. The solution was irradiated at 383 nm, and fluorescence was measured at 475nm. Neither the phenol nor pyridine alone quenched the luminescence of  $^*\text{Ir}(\text{III})$ .

1. For this experiment,  $A_0$  fixed at 0.153 M, while  $S_0$  is varied from 0.0076 to 0.0457 M.

**Table S4.3.1.** Luminescence quenching data with  $[\text{Ir}(\text{dF}(\text{CF}_3)\text{ppy})_2(\text{dtbbpy})]\text{PF}_6$ , 0.153 M pyridine, and variable [4-chlorophenol]. See **Figure S4.3.1**.

| $S_0/\text{M}$ | $S_0A_0/\text{M}^2$ | I/au 1 | I/au 2 | I/au 3 | I/au avg. | $I_0/I$  |
|----------------|---------------------|--------|--------|--------|-----------|----------|
| 0              | 0                   |        |        |        |           | 1        |
| 0.00763        | 0.001169            | 193    | 193    | 193    | 193       | 1.606218 |
| 0.015259       | 0.002339            | 146.5  | 146    | 146    | 146.1667  | 2.120867 |
| 0.022889       | 0.003508            | 115    | 115    | 115    | 115       | 2.695652 |
| 0.030519       | 0.004677            | 95.7   | 95.8   | 95.8   | 95.76667  | 3.237034 |
| 0.038148       | 0.005847            | 81     | 81.2   | 81.2   | 81.13333  | 3.820871 |
| 0.045778       | 0.007016            | 70.8   | 70.8   | 71     | 70.86667  | 4.374412 |

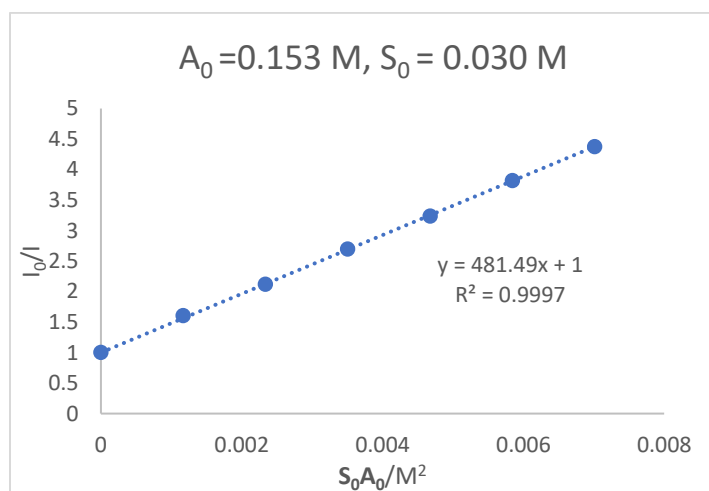

**Figure S4.3.1.** Stern-Volmer plot of luminescence data in **Table S4.3.1**.

$I_0$  was extrapolated from the six data points.

The linear Stern–Volmer quenching equation is:

$$\frac{I_0}{I} = 1 + k_{obs}\tau_0 S_0A_0$$

$$k_{obs} \tau_0 = 481.5$$

2. For this experiment,  $A_0$  fixed at 0.184 M, while  $S_0$  is varied from 0.0076 to 0.0457 M.

**Table S4.3.2.** Luminescence quenching data with  $[\text{Ir}(\text{dF}(\text{CF}_3)\text{ppy})_2(\text{dtbbpy})]\text{PF}_6$ , 0.184 M pyridine, and variable [4-chlorophenol]. See **Figure S4.3.2.**

| $S_0/\text{M}$ | $S_0A_0/\text{M}^2$ | I/au 1 | I/au 2 | I/au 3 | I/au avg. | $I_0/I$  |
|----------------|---------------------|--------|--------|--------|-----------|----------|
| 0              | 0                   |        |        |        |           | 1        |
| 0.007611       | 0.001396            | 186    | 186    | 186    | 186       | 1.66129  |
| 0.015222       | 0.002793            | 133    | 133    | 133    | 133       | 2.323308 |
| 0.022833       | 0.004189            | 105    | 105    | 104    | 104.6667  | 2.952229 |
| 0.030443       | 0.005585            | 87     | 87     | 86.3   | 86.76667  | 3.561275 |
| 0.038054       | 0.006982            | 74.3   | 74.2   | 74.4   | 74.3      | 4.158816 |
| 0.045665       | 0.008378            | 63.6   | 63.7   | 64.2   | 63.83333  | 4.840731 |

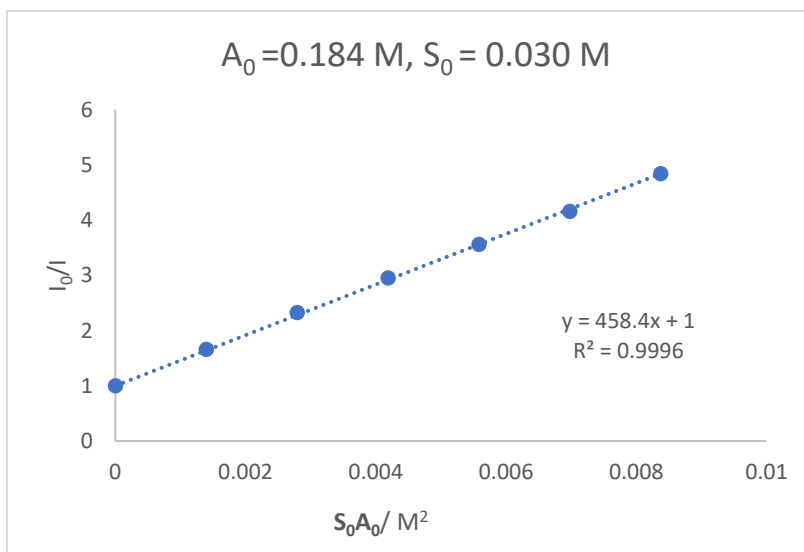

**Figure S4.3.2.** Stern-Volmer plot of luminescence data in **Table S4.3.2.**

$I_0$  was extrapolated from the six data points.

The linear Stern–Volmer quenching equation is:

$$\frac{I_0}{I} = 1 + k_{obs}\tau_0 S_0A_0$$

$$k_{obs} \tau_0 = 458.4$$

3. For this experiment,  $A_0$  fixed at 0.214 M, while  $S_0$  is varied from 0.0076 to 0.0457 M.

**Table S4.3.3.** Luminescence quenching data with  $[\text{Ir}(\text{dF}(\text{CF}_3)\text{ppy})_2(\text{dtbbpy})]\text{PF}_6$ , 0.214 M pyridine, and variable [4-chlorophenol]. See **Figure S4.3.3.**

| $S_0/\text{M}$ | $S_0A_0/\text{M}^2$ | $I/\text{au 1}$ | $I/\text{au 2}$ | $I/\text{au 3}$ | $I/\text{au avg.}$ | $I_0/I$  |
|----------------|---------------------|-----------------|-----------------|-----------------|--------------------|----------|
| 0              | 0                   |                 |                 |                 |                    | 1        |
| 0.007592       | 0.001621            | 174             | 174             | 174             | 174                | 1.764368 |
| 0.015184       | 0.003242            | 127             | 126             | 126             | 126.3333           | 2.430079 |
| 0.022776       | 0.004863            | 97.5            | 97.5            | 97.4            | 97.46667           | 3.149795 |
| 0.030369       | 0.006484            | 80.4            | 80.5            | 80.4            | 80.43333           | 3.816826 |
| 0.037961       | 0.008105            | 68              | 68              | 68              | 68                 | 4.514706 |
| 0.045553       | 0.009726            | 58.6            | 58.3            | 58.4            | 58.43333           | 5.253851 |

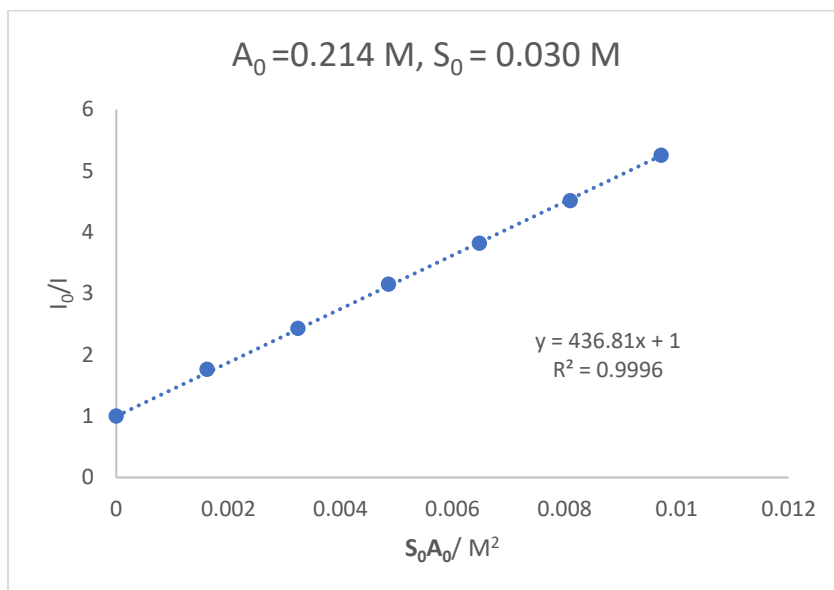

**Figure S4.3.3.** Stern-Volmer plot of luminescence data in **Table S4.3.3.**

$I_0$  was extrapolated from the six data points.

The linear Stern–Volmer quenching equation is:

$$\frac{I_0}{I} = 1 + k_{obs}\tau_0 S_0A_0$$

$$k_{obs} \tau_0 = 436.8$$



4. For this experiment,  $A_0$  fixed at 0.273 M, while  $S_0$  is varied from 0.0076 to 0.0457 M.

**Table S4.3.4.** Luminescence quenching data with  $[\text{Ir}(\text{dF}(\text{CF}_3)\text{ppy})_2(\text{dtbbpy})]\text{PF}_6$ , 0.2732 M pyridine, and variable [4-chlorophenol]. See **Figure S4.3.4.**

| $S_0/\text{M}$ | $S_0A_0/\text{M}^2$ | $I/\text{au 1}$ | $I/\text{au 2}$ | $I/\text{au 3}$ | $I/\text{au avg.}$ | $I_0/I$  |
|----------------|---------------------|-----------------|-----------------|-----------------|--------------------|----------|
| 0              | 0                   |                 |                 |                 |                    | 1        |
| 0.007555       | 0.002064            | 162             | 163             | 163             | 162.6667           | 1.865779 |
| 0.01511        | 0.004128            | 112             | 112             | 111             | 111.6667           | 2.71791  |
| 0.022665       | 0.006192            | 86.5            | 86.5            | 86.4            | 86.46667           | 3.510023 |
| 0.03022        | 0.008256            | 71.1            | 71.1            | 71.3            | 71.16667           | 4.264637 |
| 0.037775       | 0.010319            | 59.4            | 59.4            | 59.3            | 59.36667           | 5.112296 |
| 0.04533        | 0.012383            | 51.2            | 51.3            | 51.3            | 51.26667           | 5.920026 |

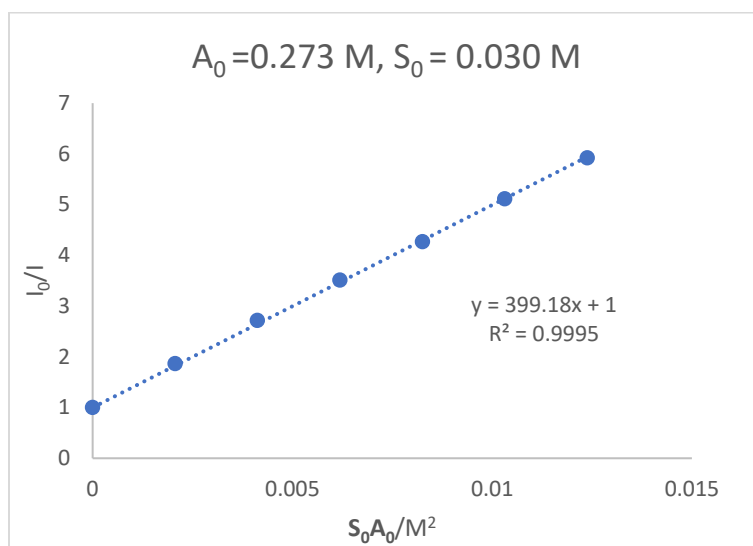

**Figure S4.3.4.** Stern-Volmer plot of luminescence data in **Table S4.3.4.**

$I_0$  was extrapolated from the six data points.

The linear Stern–Volmer quenching equation is:

$$\frac{I_0}{I} = 1 + k_{obs}\tau_0 S_0A_0$$

$$k_{obs}\tau_0 = 399.2$$

$$S_0 + A_0 = \frac{S_0 A_0 k_{obs} \tau_0}{k_{PCET} \tau_0} + \frac{k_{PCET} \tau_0}{k_{obs} \tau_0} - \frac{1}{K_A} \quad (8)$$

|          | <b>A<sub>0</sub> (M)</b> | <b>S<sub>0</sub> (M)</b> | <b>S<sub>0</sub>A<sub>0</sub> (M<sup>2</sup>)</b> | <b>S<sub>0</sub>+A<sub>0</sub> (M)</b> | <b>k<sub>obs</sub>τ<sub>0</sub></b> |
|----------|--------------------------|--------------------------|---------------------------------------------------|----------------------------------------|-------------------------------------|
| <b>1</b> | 0.153                    | 0.030                    | 0.00460                                           | 0.183                                  | 482                                 |
| <b>2</b> | 0.184                    | 0.030                    | 0.00551                                           | 0.214                                  | 458                                 |
| <b>3</b> | 0.214                    | 0.030                    | 0.00641                                           | 0.244                                  | 437                                 |
| <b>4</b> | 0.273                    | 0.030                    | 0.00820                                           | 0.303                                  | 399                                 |

|                        |                                     |
|------------------------|-------------------------------------|
| <b>into equation 8</b> | <b>K<sub>A</sub>/M<sup>-1</sup></b> |
| <b>1&amp;2</b>         | 2.67                                |
| <b>1&amp;3</b>         | 2.49                                |
| <b>1&amp;4</b>         | 2.58                                |
| <b>2&amp;3</b>         | 2.62                                |
| <b>2&amp;4</b>         | 2.62                                |
| <b>3&amp;4</b>         | 2.62                                |
| <b>average</b>         | 2.6±0.1                             |

This value of  $K_A$  is within the error reported by Linschitz ( $2.8 \pm 0.2 \text{ M}^{-1}$  *via* spectroscopic measurement;  $2.6 \pm 0.3 \text{ M}^{-1}$  *via* saturation kinetics).<sup>5</sup>

## 5. Generation of Data Points in the Main Rate-Driving Force Correlation

### $pK_a$ Values (in MeCN) of Acids Employed in this Study<sup>6-9</sup>

(PhO)<sub>2</sub>P(O)OH: 13

*p*-TsOH: 8.6

NEt<sub>3</sub>HBF<sub>4</sub>: 18.8

NMe<sub>3</sub>HBF<sub>4</sub>: 17.6

**Effective BDFE Equation**<sup>10-12</sup> 'BDFE' (kcal/mol) = 1.37pK<sub>a</sub> + 23.06E<sup>0</sup> + 54.9

**Table S5. Kinetic and H-bonding equilibrium data for ketone MS-PCET reactions**

| Entry | Ketone | acid                              | reductant | BDFE <sub>O-H</sub><br>(kcal/mol) | BDFE <sub>O-H</sub> <sup>-</sup><br>'BDFE'<br>(kcal/mol) | K <sub>A</sub><br>(M <sup>-1</sup> ) | ΔG <sup>o</sup> <sub>H-bond</sub><br>(kcal/mol) | ΔG <sup>o</sup> <sub>PCET</sub><br>(kcal/mol) | ln[k' <sub>PCET</sub> (M <sup>-1</sup> s <sup>-1</sup> )]<br>(effective) <sup>a</sup> | ln[k' <sub>PCET</sub> (M <sup>-1</sup> s <sup>-1</sup> )]<br>(actual) <sup>b</sup> |
|-------|--------|-----------------------------------|-----------|-----------------------------------|----------------------------------------------------------|--------------------------------------|-------------------------------------------------|-----------------------------------------------|---------------------------------------------------------------------------------------|------------------------------------------------------------------------------------|
| 1     | 1      | (PhO) <sub>2</sub> P(O)OH         | 6         | 27.1                              | -3.1                                                     | 6.3                                  | -1.1                                            | -2.0                                          | 19.92                                                                                 | 19.95                                                                              |
| 2     | 2      | (PhO) <sub>2</sub> P(O)OH         | 6         | 21.5                              | 2.4                                                      | 92                                   | -2.7                                            | 5.1                                           | 17.97                                                                                 | 17.97                                                                              |
| 3     | 3      | (PhO) <sub>2</sub> P(O)OH         | 6         | 24.8                              | -0.8                                                     | 17                                   | -1.5                                            | 0.7                                           | 19.35                                                                                 | 19.35                                                                              |
| 4     | 4      | (PhO) <sub>2</sub> P(O)OH         | 6         | 29.6                              | -5.6                                                     | 2.1                                  | -0.4                                            | -5.2                                          | 21.16                                                                                 | 21.27                                                                              |
| 5     | 5      | (PhO) <sub>2</sub> P(O)OH         | 6         | 28.3                              | -4.4                                                     | 6.2                                  | -1.1                                            | -3.3                                          | 20.52                                                                                 | 20.58                                                                              |
| 6     | 1      | (PhO) <sub>2</sub> P(O)OH         | 9         | 27.1                              | -4.9                                                     | 6.3                                  | -1.1                                            | -3.8                                          | 20.58                                                                                 | 20.63                                                                              |
| 7     | 2      | (PhO) <sub>2</sub> P(O)OH         | 8         | 21.5                              | -1.4                                                     | 92                                   | -2.7                                            | 1.3                                           | 19.19                                                                                 | 19.19                                                                              |
| 8     | 3      | (PhO) <sub>2</sub> P(O)OH         | 8         | 24.8                              | -4.6                                                     | 17                                   | -1.5                                            | -3.1                                          | 20.47                                                                                 | 20.47                                                                              |
| 9     | 1      | (PhO) <sub>2</sub> P(O)OH         | 7         | 27.1                              | 1.7                                                      | 6.3                                  | -1.1                                            | 2.9                                           | 18.69                                                                                 | 18.69                                                                              |
| 10    | 2      | (PhO) <sub>2</sub> P(O)OH         | 7         | 21.5                              | 7.2                                                      | 92                                   | -2.7                                            | 10.2                                          | 16.86                                                                                 | 16.86                                                                              |
| 11    | 3      | (PhO) <sub>2</sub> P(O)OH         | 7         | 24.8                              | 4.0                                                      | 17                                   | -1.5                                            | 5.5                                           | 17.94                                                                                 | 17.94                                                                              |
| 12    | 4      | (PhO) <sub>2</sub> P(O)OH         | 7         | 29.6                              | -0.8                                                     | 2.1                                  | -0.4                                            | -0.3                                          | 19.8                                                                                  | 19.79                                                                              |
| 13    | 5      | (PhO) <sub>2</sub> P(O)OH         | 7         | 28.3                              | 0.5                                                      | 6.2                                  | -1.1                                            | 1.6                                           | 19.05                                                                                 | 19.05                                                                              |
| 14    | 3      | NEt <sub>3</sub> HBF <sub>4</sub> | 8         | 24.8                              | 3.6                                                      | 17                                   | -1.7                                            | 5.3                                           | 18.47                                                                                 | 18.47                                                                              |
| 15    | 3      | NMe <sub>3</sub> HBF <sub>4</sub> | 8         | 24.8                              | 1.8                                                      | 16                                   | -1.6                                            | 3.4                                           | 18.69                                                                                 | 18.69                                                                              |
| 16    | 3      | <i>p</i> -TsOH                    | 7         | 24.8                              | -2.0                                                     | 21                                   | -1.8                                            | -0.2                                          | 19.7                                                                                  | 19.7                                                                               |
| 17    | 5      | <i>p</i> -TsOH                    | 7         | 28.3                              | -5.4                                                     | 15                                   | -1.6                                            | -3.7                                          | 20.66                                                                                 | 20.72                                                                              |
| 18    | 5      | <i>p</i> -TsOH                    | 6         | 28.3                              | -10.3                                                    | 15                                   | -1.6                                            | -8.5                                          | 21.8                                                                                  | 22.15                                                                              |
| 19    | 1      | <i>p</i> -TsOH                    | 7         | 27.1                              | -4.2                                                     | 15                                   | -1.6                                            | -2.7                                          | 20.21                                                                                 | 20.24                                                                              |
| 20    | 3      | <i>p</i> -TsOH                    | 6         | 24.8                              | -6.9                                                     | 21                                   | -1.8                                            | -5.1                                          | 20.93                                                                                 | 21.01                                                                              |

<sup>a</sup>ln[k<sub>PCET</sub>(M<sup>-1</sup>s<sup>-1</sup>)] (effective) was obtained by the experimental method described above. The data points generation described below are in the column "ln[k<sub>PCET</sub>(M<sup>-1</sup>s<sup>-1</sup>)] (effective)".

<sup>b</sup>ln[k'<sub>PCET</sub>(M<sup>-1</sup>s<sup>-1</sup>)] (actual) takes the diffusion rate limit ( $k_{diff} = 10^{10.2} \text{ M}^{-1}\text{s}^{-1}$  in MeCN) into consideration, in the relationship

$$k_{PCET}(effective) = \frac{k_{PCET} \times k_{diff}}{k_{PCET} + k_{diff}}$$

### 5.1. Entry 1.

Non-PCET quenching of reductant by acetophenone alone (without acid) is given by the following equation:

$$I_0/I = 1 + k'_{sv} S_0$$

The solution was irradiated at 375nm, and fluorescence was measured at 518nm.

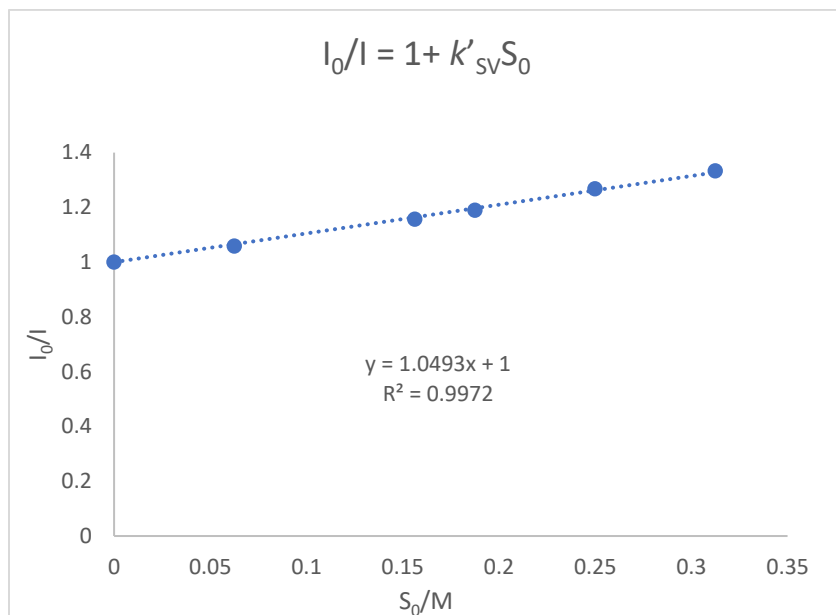

**Figure S5.1.** Stern-Volmer plot of luminescence data of non-PCET quenching by ketone alone

$$k'_{sv} = 1.05$$

Time-resolved luminescence suggests that the non-PCET quenching by acetophenone is static, while  $(\text{PhO})_2\text{P}(\text{O})\text{OH}$  does not quench the luminescence intensity. Therefore, the following equation is used:

$$\frac{I_0/I}{1 + k_{sv}'S_0} = 1 + k_{obs}\tau_0 S_0 A_0$$

$\frac{I_0/I}{1 + k_{sv}'S_0}$  was plotted against  $S_0 A_0$  with vertical intercept of 1 in all four experiments. Each slope provides the corresponding  $k_{obs}\tau_0$ . Given that acetophenone does not dynamically quench the excited state of the reductant, in each of the four luminescence quenching experiments the concentration of ketone was held

constant, while the concentration of acid was varied. Determination of  $k_{SV}'$  was not needed, as  $\frac{I_0/I}{1+k_{SV}'S_0}$  could be extrapolated, and the slope gives the corresponding  $k_{obs}\tau_0$ .

**Table. S5.1.1.  $S_0$  fixed at 0.040 M,  $A_0$  varied from 0.0020 to 0.0060 M**

| $A_0/M$ | $S_0A_0/M^2$ | I/au 1 | I/au 2 | I/au 3 | I/au avg. | $I_0/(1+k_{SV}' S_0)$ |
|---------|--------------|--------|--------|--------|-----------|-----------------------|
| 0       | 0            |        |        |        |           | 1                     |
| 0.002   | 0.00008      | 729    | 730    | 730    | 729.6667  | 1.330745              |
| 0.003   | 0.00012      | 649    | 650    | 647    | 648.6667  | 1.496917              |
| 0.004   | 0.00016      | 587    | 586    | 587    | 586.6667  | 1.655114              |
| 0.005   | 0.0002       | 531    | 529    | 530    | 530       | 1.832075              |
| 0.006   | 0.00024      | 487    | 487    | 486    | 486.6667  | 1.995205              |

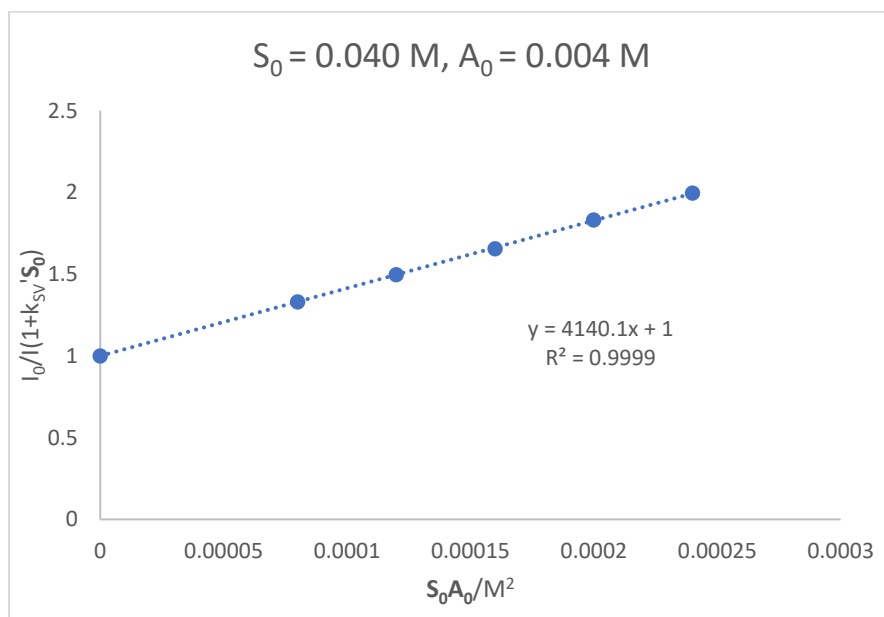

**Figure S5.1.1.** Stern-Volmer plot of luminescence data in **Table S5.1.1**

$$k_{obs}\tau_0 = 4140$$

**Table S5.1.2.  $S_0$  fixed at 0.061 M,  $A_0$  varied from 0.002 to 0.006 M**

| $A_0/M$ | $S_0A_0/M^2$ | I/au 1 | I/au 2 | I/au 3 | I/au avg. | $I_0/I(1+k_{sv}' S_0)$ |
|---------|--------------|--------|--------|--------|-----------|------------------------|
| 0       | 0            |        |        |        |           | 1                      |
| 0.002   | 0.0001228    | 568    | 566    | 566    | 566.6667  | 1.473529               |
| 0.003   | 0.0001842    | 487    | 490    | 488    | 488.3333  | 1.709898               |
| 0.004   | 0.0002456    | 438    | 438    | 438    | 438       | 1.906393               |
| 0.005   | 0.000307     | 388    | 388    | 388    | 388       | 2.152062               |
| 0.006   | 0.0003684    | 348    | 348    | 350    | 348.6667  | 2.394837               |

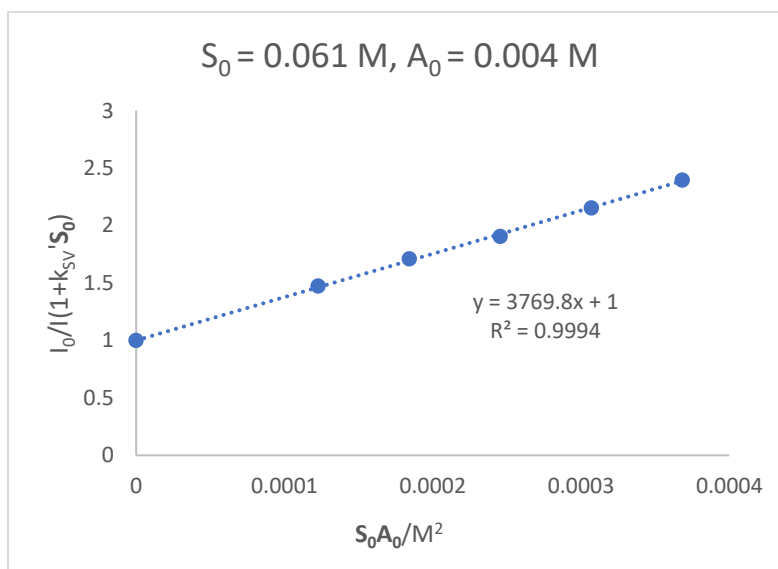

**Figure S5.1.2.** Stern-Volmer plot of luminescence data in **Table S5.1.2**

$$k_{obs}\tau_0 = 3770$$

**Table S5.1.3.  $S_0$  fixed at 0.083 M,  $A_0$  varied from 0.002 to 0.006 M**

| $A_0/M$ | $S_0A_0/M^2$ | I/au 1 | I/au 2 | I/au 3 | I/au avg. | $I_0/I(1+k_{sv}' S_0)$ |
|---------|--------------|--------|--------|--------|-----------|------------------------|
| 0       | 0            |        |        |        |           | 1                      |
| 0.002   | 0.00016572   | 404    | 404    | 405    | 404.3333  | 1.57296                |
| 0.003   | 0.00024858   | 340    | 340    | 340    | 340       | 1.870588               |
| 0.004   | 0.00033144   | 294    | 297    | 297    | 296       | 2.148649               |
| 0.005   | 0.0004143    | 262    | 262    | 263    | 262.3333  | 2.424396               |
| 0.006   | 0.00049716   | 235    | 236    | 236    | 235.6667  | 2.698727               |

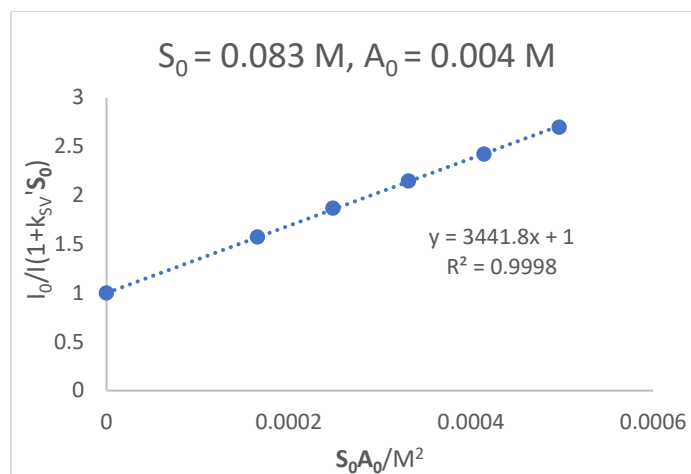

**Figure S5.1.3.** Stern-Volmer plot of luminescence data in **Table S5.1.3**

$$k_{obs}\tau_0 = 3442$$

**Table S5.1.4.**  $S_0$  fixed at 0.104 M,  $A_0$  varied from 0.002 to 0.006 M

| $A_0/\text{M}$ | $S_0A_0/\text{M}^2$ | I/au 1 | I/au 2 | I/au 3 | I/au avg. | $I_0/(1+k_{sv}' S_0)$ |
|----------------|---------------------|--------|--------|--------|-----------|-----------------------|
| 0              | 0                   |        |        |        |           | 1                     |
| 0.002          | 0.0002074           | 344    | 347    | 346    | 345.6667  | 1.672131              |
| 0.003          | 0.0003111           | 287    | 287    | 288    | 287.3333  | 2.011601              |
| 0.004          | 0.0004148           | 249    | 248    | 251    | 249.3333  | 2.318182              |
| 0.005          | 0.0005185           | 219    | 218    | 220    | 219       | 2.639269              |
| 0.006          | 0.0006222           | 196    | 196    | 195    | 195.6667  | 2.954003              |

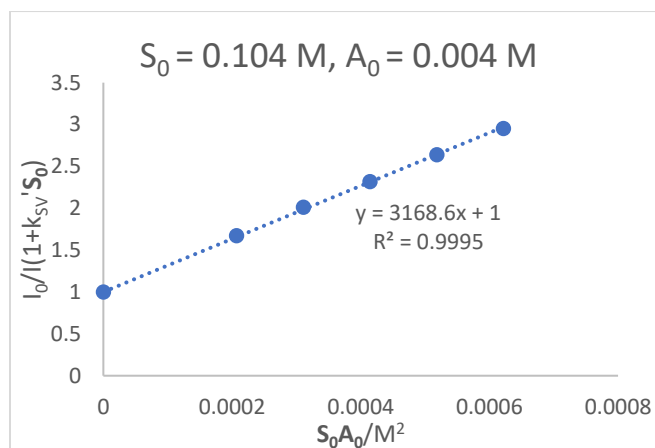

**Figure S5.1.4.** Stern-Volmer plot of luminescence data in **Table S5.1.4**

$$k_{obs}\tau_0 = 3169$$

$$S_0 + A_0 = \frac{S_0 A_0 k_{obs} \tau_0}{k_{PCET} \tau_0} + \frac{k_{PCET} \tau_0}{k_{obs} \tau_0} - \frac{1}{K_A} \quad (8)$$

**Table 5.1.5. Solutions to Key Equation 8 and Entry 1 in Table S5.**

|          | <b>S<sub>0</sub> (M)</b> | <b>A<sub>0</sub> (M)</b> | <b>S<sub>0</sub>A<sub>0</sub> (M<sup>2</sup>)</b> | <b>S<sub>0</sub>+A<sub>0</sub> (M)</b> | <b>k<sub>obs</sub>τ<sub>0</sub></b> |
|----------|--------------------------|--------------------------|---------------------------------------------------|----------------------------------------|-------------------------------------|
| <b>1</b> | 0.040                    | 0.0040                   | 0.00016                                           | 0.044                                  | 4140                                |
| <b>2</b> | 0.061                    | 0.0040                   | 0.000244                                          | 0.065                                  | 3770                                |
| <b>3</b> | 0.083                    | 0.0040                   | 0.000332                                          | 0.087                                  | 3440                                |
| <b>4</b> | 0.104                    | 0.0040                   | 0.000416                                          | 0.108                                  | 3170                                |

|                | <b>K<sub>A</sub>/M<sup>-1</sup></b> | <b>k<sub>PCET</sub>τ<sub>0</sub>/M<sup>-1</sup></b> |
|----------------|-------------------------------------|-----------------------------------------------------|
| <b>1&amp;2</b> | 5.8                                 | 888                                                 |
| <b>1&amp;3</b> | 6.1                                 | 859                                                 |
| <b>1&amp;4</b> | 6.2                                 | 848                                                 |
| <b>2&amp;3</b> | 6.4                                 | 833                                                 |
| <b>2&amp;4</b> | 6.4                                 | 829                                                 |
| <b>3&amp;4</b> | 6.5                                 | 826                                                 |
| <b>average</b> | 6.2                                 | 847                                                 |

$$\Delta G^\circ_{\text{H-bond}} \text{ (kcal/mol)} = -RT \ln K_A = -1.09$$

$$\ln[k_{\text{PCET}}(\text{M}^{-1}\text{s}^{-1})] = \ln[k_{\text{PCET}}\tau_0/\tau_0] = 19.91$$

$$\tau_0 = 1.9 \mu\text{s}$$

$$\text{error in } \Delta G^\circ_{\text{H-bond}} \text{ (kcal/mol)} = 0.05$$

$$\text{error in } \ln[k_{\text{PCET}}(\text{M}^{-1}\text{s}^{-1})] = 0.05$$



## 5.2. Entry 2.

The solution was irradiated at 375nm, and fluorescence was measured at 518nm. Neither the ketone nor the acid quenches reductant **6** \*Ir (III). Therefore, the following equation is used:

$$\frac{I_0}{I} = 1 + k_{obs}\tau_0 S_0 A_0$$

In all the four experiments,  $\frac{I_0}{I}$  is plotted against  $S_0 A_0$ , each slope provides the corresponding  $k_{obs}\tau_0$ .

**Table S5.2.1.  $S_0$  fixed at 0.010 M,  $A_0$  varied from 0.0075 to 0.0125 M**

| $A_0/M$ | $S_0 A_0/M^2$ | I/au 1 | I/au 2 | I/au 3 | I/au avg. | $I_0/I$  |
|---------|---------------|--------|--------|--------|-----------|----------|
| 0       | 0             |        |        |        |           | 1        |
| 0.0075  | 0.000075      | 691    | 689    | 691    | 690.3333  | 1.344278 |
| 0.00875 | 0.0000875     | 662    | 665    | 662    | 663       | 1.399698 |
| 0.01    | 0.0001        | 639    | 639    | 643    | 640.3333  | 1.449245 |
| 0.01125 | 0.0001125     | 618    | 618    | 620    | 618.6667  | 1.5      |
| 0.0125  | 0.000125      | 589    | 591    | 594    | 591.3333  | 1.569335 |

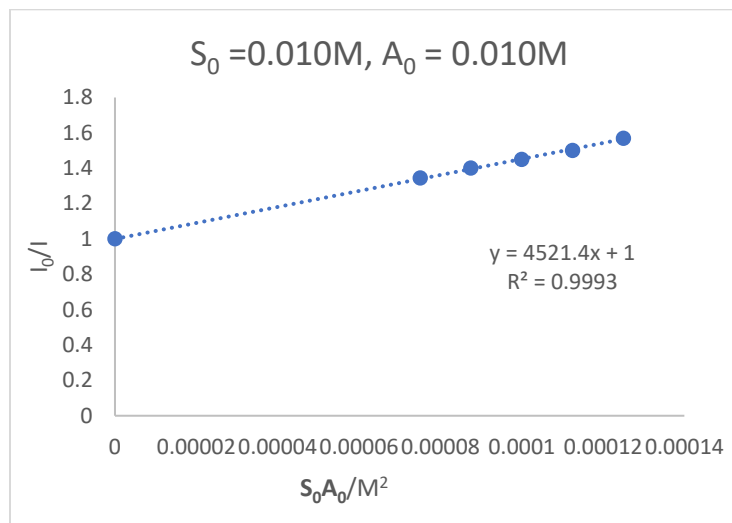

**Figure S5.2.1. Stern-Volmer plot of luminescence data in Table S5.2.1**

$I_0$  was extrapolated from the five data points.

$$k_{obs}\tau_0 = 4521$$

**Table S5.2.2.  $S_0$  fixed at 0.040 M,  $A_0$  varied from 0.0018 to 0.0037 M**

| $A_0/M$  | $S_0A_0/M^2$ | I/au 1 | I/au 2 | I/au 3 | I/au avg. | $I_0/I$  |
|----------|--------------|--------|--------|--------|-----------|----------|
| 0        | 0            |        |        |        |           | 1        |
| 0.001875 | 0.000075     | 745    | 745    | 743    | 744.3333  | 1.179579 |
| 0.0025   | 0.0001       | 708    | 710    | 710    | 709.3333  | 1.237782 |
| 0.003125 | 0.000125     | 683    | 683    | 686    | 684       | 1.283626 |
| 0.00375  | 0.00015      | 652    | 648    | 656    | 652       | 1.346626 |

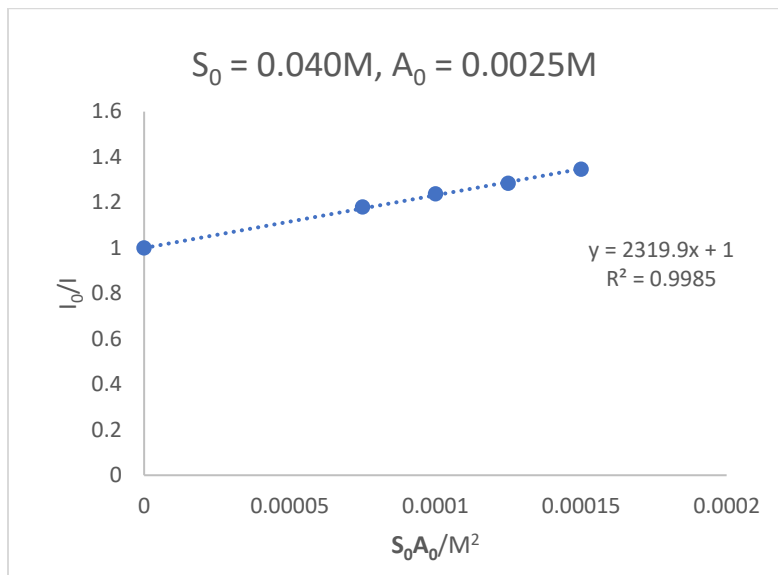

**Figure S5.2.2.** Stern-Volmer plot of luminescence data in **Table S5.2.2**

$I_0$  was extrapolated from the four data points.

$$k_{obs}\tau_0 = 2320$$

**Table S5.2.3.  $S_0$  fixed at 0.0625 M,  $A_0$  varied from 0.0004 to 0.0024 M**

| $A_0/M$ | $S_0A_0/M^2$ | I/au 1 | I/au 2 | I/au 3 | I/au avg. | $I_0/I$  |
|---------|--------------|--------|--------|--------|-----------|----------|
| 0       | 0            |        |        |        |           | 1        |
| 0.0004  | 0.000025     | 597    | 599    | 598    | 598       | 1.041806 |
| 0.0008  | 0.00005      | 576    | 577    | 577    | 576.6667  | 1.080347 |
| 0.0012  | 0.000075     | 560    | 558    | 558    | 558.6667  | 1.115155 |
| 0.0016  | 0.0001       | 537    | 536    | 535    | 536       | 1.162313 |
| 0.0024  | 0.00015      | 499    | 500    | 504    | 501       | 1.243513 |

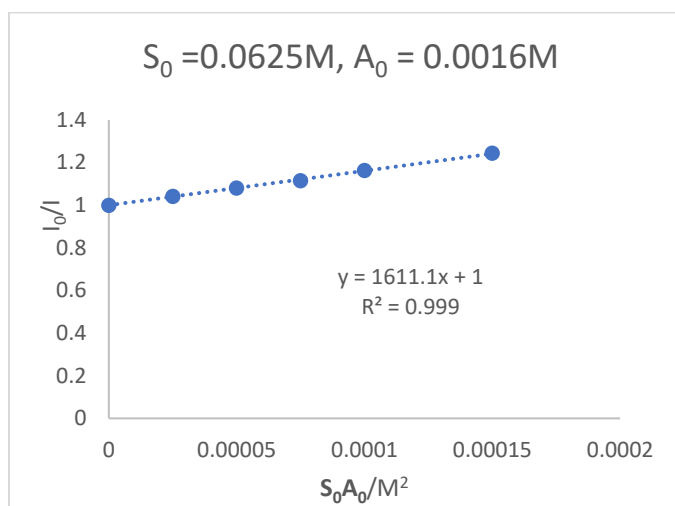

**Figure S5.2.3. Stern-Volmer plot of luminescence data in Table S5.2.3**

$I_0$  was extrapolated from the five data points.

$$k_{obs}\tau_0 = 1611$$

**Table S5.2.4.  $S_0$  fixed at 0.156 M,  $A_0$  varied from 0.0004 to 0.0024 M**

| $A_0/M$ | $S_0A_0/M^2$ | I/au 1 | I/au 2 | I/au 3 | I/au avg. | $I_0/I$  |
|---------|--------------|--------|--------|--------|-----------|----------|
| 0       | 0            |        |        |        |           | 1        |
| 0.0004  | 0.0000625    | 763    | 764    | 764    | 763.6667  | 1.04234  |
| 0.0008  | 0.000125     | 728    | 731    | 730    | 729.6667  | 1.090909 |
| 0.0012  | 0.0001875    | 705    | 704    | 705    | 704.6667  | 1.129612 |
| 0.0016  | 0.00025      | 671    | 676    | 678    | 675       | 1.179259 |
| 0.002   | 0.0003125    | 649    | 650    | 651    | 650       | 1.224615 |
| 0.0024  | 0.000375     | 628    | 628    | 629    | 628.3333  | 1.266844 |

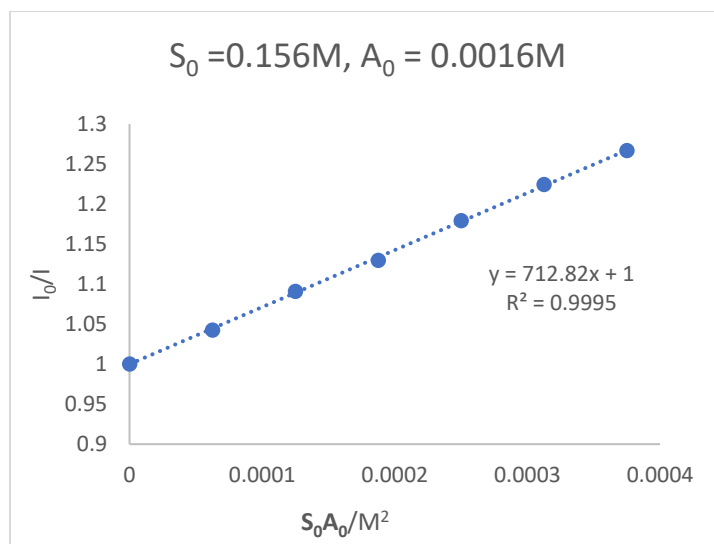

**Figure S5.2.4. Stern-Volmer plot of luminescence data in Table S5.2.4**

$I_0$  was extrapolated from the six data points.

$$k_{obs}\tau_0 = 713$$

$$S_0 + A_0 = \frac{S_0 A_0 k_{obs} \tau_0}{k_{PCET} \tau_0} + \frac{k_{PCET} \tau_0}{k_{obs} \tau_0} - \frac{1}{K_A} \quad (8)$$

**Table 5.2.5. Solutions to Key Equation 8 and Entry 2 in Table S5.**

| entry | S <sub>0</sub> (M) | A <sub>0</sub> (M) | S <sub>0</sub> A <sub>0</sub> (M <sup>2</sup> ) | S <sub>0</sub> +A <sub>0</sub> (M) | k <sub>obs</sub> τ <sub>0</sub> |
|-------|--------------------|--------------------|-------------------------------------------------|------------------------------------|---------------------------------|
| 1     | 0.01               | 0.01               | 0.0001                                          | 0.02                               | 5690                            |
| 2     | 0.025              | 0.004              | 0.0001                                          | 0.029                              | 3820                            |
| 3     | 0.0625             | 0.0016             | 0.0001                                          | 0.0641                             | 1780                            |
| 4     | 0.15625            | 0.00064            | 0.0001                                          | 0.15689                            | 763                             |

|         | K <sub>A</sub> /M <sup>-1</sup> | k <sub>PCET</sub> τ <sub>0</sub> /M <sup>-1</sup> |
|---------|---------------------------------|---------------------------------------------------|
| 1&2     | 101                             | 118                                               |
| 1&3     | 102                             | 116                                               |
| 1&4     | 94                              | 122                                               |
| 2&3     | 92                              | 119                                               |
| 2&4     | 89                              | 119                                               |
| 3&4     | 88                              | 120                                               |
| average | 94                              | 119                                               |

$$\Delta G^\circ_{\text{H-bond}} (\text{kcal/mol}) = -RT \ln K_A = -2.69$$

$$\ln[k_{\text{PCET}} (\text{M}^{-1} \text{s}^{-1})] = \ln[k_{\text{PCET}} \tau_0 / \tau_0] = 17.95$$

$$\tau_0 = 1.9 \mu\text{s}$$

$$\text{error of } \Delta G^\circ_{\text{H-bond}} (\text{kcal/mol}) = 0.05$$

$$\text{error of } \ln[k_{\text{PCET}} (\text{M}^{-1} \text{s}^{-1})] = 0.02$$

### 5.3. Entry 3.

Non-PCET quenching of reductant by ketone alone (without acid) is given by the following equation:

$$I_0/I = 1 + k'_{SV} S_0$$

The solution was irradiated at 375nm, and fluorescence was measured at 518nm.

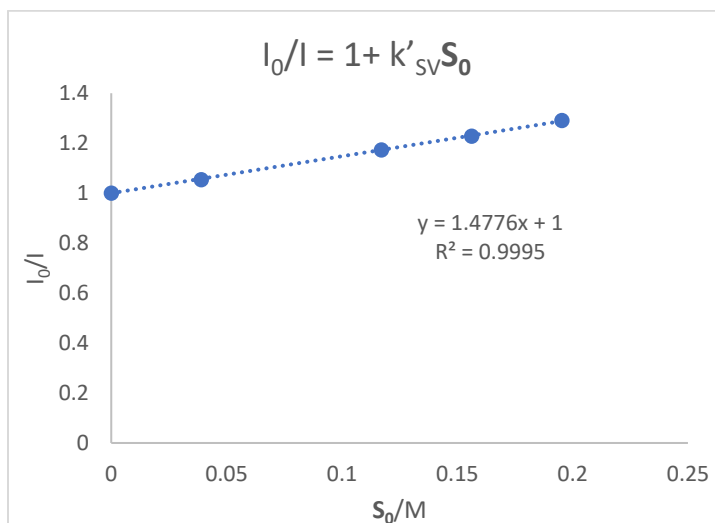

**Figure S5.3.** Stern-Volmer plot of luminescence data of non-PCET quenching by ketone alone

$$k'_{SV} = 1.48$$

Time-resolved luminescence suggests that the non-PCET quenching by ketone is static, while (PhO)<sub>2</sub>P(O)OH does not quench the luminescence intensity. Therefore, the following equation is used:

$$\frac{I_0/I}{1 + k_{SV}' S_0} = 1 + k_{obs} \tau_0 S_0 A_0$$

$\frac{I_0/I}{1 + k_{SV}' S_0}$  was plotted against  $S_0 A_0$  with vertical intercept of 1 in all four experiments. Each slope provides the corresponding  $k_{obs SV}$ . Given that acetophenone does not dynamically quench the excited state of the reductant, in each of the four luminescence quenching experiments the concentration of ketone was held constant, while the concentration of acid was varied. Determination of  $k_{SV}'$  was not needed, as  $\frac{I_0}{1 + k_{SV}' S_0}$  could be extrapolated, and the slope gives the corresponding  $k_{obs} \tau_0$ .

**Table S5.3.1.  $A_0$  fixed at 0.0100 M,  $S_0$  varied from 0.0075 to 0.0125 M**

| $S_0/M$ | $S_0A_0/M^2$ | $I/au$ 1 | $I/au$ 2 | $I/au$ 3 | $I/au$ avg. | $I_0/I$  | $I_0/I(1+k_{sv}' S_0)$ |
|---------|--------------|----------|----------|----------|-------------|----------|------------------------|
| 0       | 0            | 893      | 888      | 895      | 892         | 1        | 1                      |
| 0.0075  | 0.000075     | 611      | 615      | 615      | 613.6667    | 1.453558 | 1.437622               |
| 0.00875 | 8.75E-05     | 586      | 586      | 586      | 586         | 1.522184 | 1.50275                |
| 0.01125 | 0.000113     | 532      | 531      | 531      | 531.3333    | 1.678795 | 1.651338               |
| 0.0125  | 0.000125     | 519      | 510      | 510      | 513         | 1.738791 | 1.70725                |

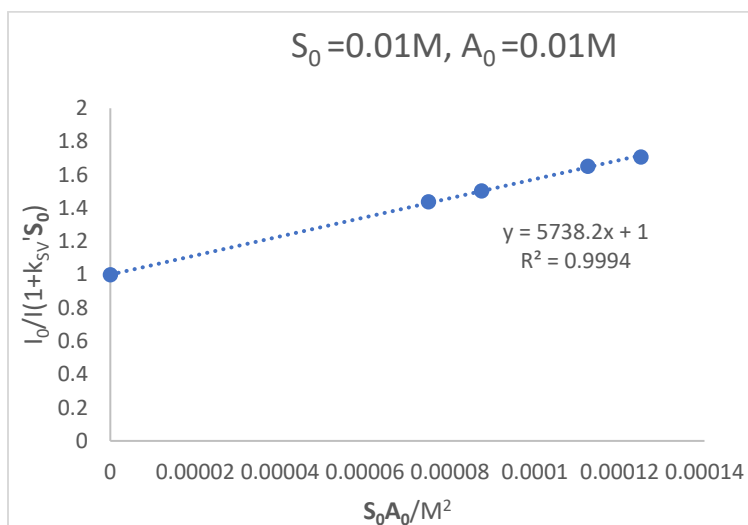

**Figure S5.3.1.** Stern-Volmer plot of luminescence data in **Table S5.3.1**

$$k_{obs}\tau_0 = 5738$$

**Table S5.3.2.  $S_0$  fixed at 0.025 M,  $A_0$  varied from 0.0020 to 0.0070 M**

| $A_0/M$ | $S_0A_0/ M^2$ | I/au 1 | I/au 2 | I/au 3 | I/au avg. | $I_0/I(1+k_{sv}' S_0)$ |
|---------|---------------|--------|--------|--------|-----------|------------------------|
| 0       | 0             |        |        |        |           | 1                      |
| 0.002   | 0.00005       | 617    | 618    | 619    | 618       | 1.273463               |
| 0.003   | 0.000075      | 562    | 564    | 562    | 562.6667  | 1.398697               |
| 0.004   | 0.0001        | 516    | 511    | 514    | 513.6667  | 1.532122               |
| 0.005   | 0.000125      | 476    | 474    | 474    | 474.6667  | 1.658006               |
| 0.006   | 0.00015       | 443    | 443    | 443    | 443       | 1.776524               |
| 0.007   | 0.000175      | 413    | 411    | 411    | 411.6667  | 1.911741               |

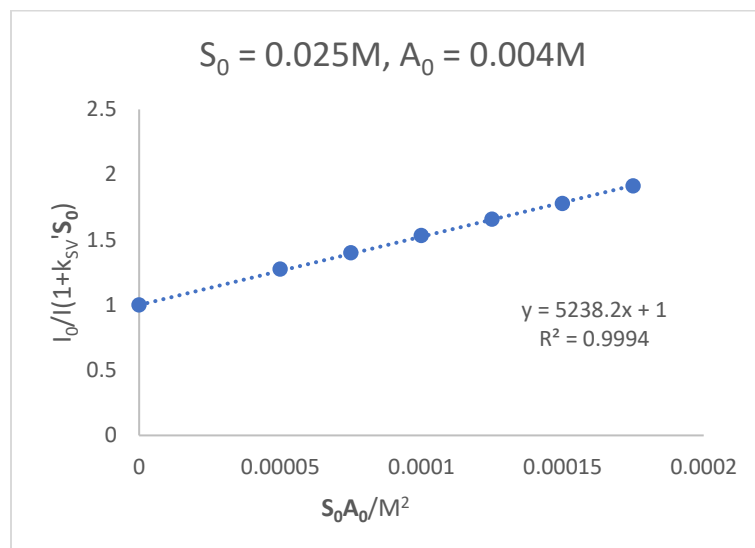

**Figure S5.3.2.** Stern-Volmer plot of luminescence data in **Table S5.3.2**

$\frac{I_0}{1+k_{sv}'S_0}$  was extrapolated from the six data points.

$$k_{obs}\tau_0 = 5238$$



**Table S5.3.3.  $A_0$  fixed at 0.0016 M,  $S_0$  varied from 0.047 to 0.078 M**

| $S_0/M$  | $S_0A_0/M^2$ | I/au 1 | I/au 2 | I/au 3 | I/au avg. | $I_0/I$  | $I_0/I(1+k_{sv}' S_0)$ |
|----------|--------------|--------|--------|--------|-----------|----------|------------------------|
| 0        | 0            | 892    | 893    | 891    | 892       | 1        | 1                      |
| 0.046875 | 0.000075     | 647    | 648    | 648    | 647.6667  | 1.377252 | 1.288016               |
| 0.054688 | 8.75E-05     | 616    | 616    | 616    | 616       | 1.448052 | 1.339762               |
| 0.0625   | 0.0001       | 594    | 589    | 585    | 589.3333  | 1.513575 | 1.385582               |
| 0.070313 | 0.000113     | 562    | 561    | 562    | 561.6667  | 1.588131 | 1.438626               |
| 0.078125 | 0.000125     | 539    | 541    | 537    | 539       | 1.654917 | 1.483606               |

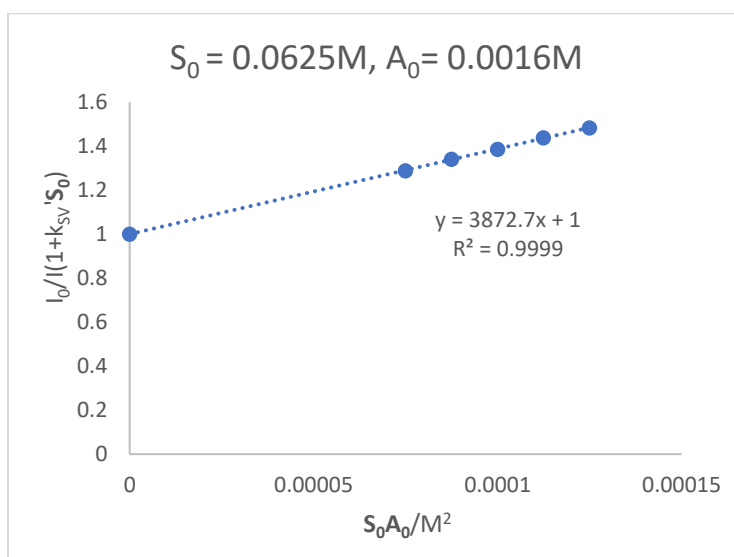

**Figure S5.3.3.** Stern-Volmer plot of luminescence data in **Table S5.3.3**

$$k_{obs}\tau_0 = 3873$$

**Table S5.3.4.  $S_0$  fixed at 0.156 M,  $A_0$  varied from 0.0015 to 0.0035 M**

| $A_0/M$ | $S_0A_0/ M^2$ | I/au 1 | I/au 2 | I/au 3 | I/au avg. | $I_0/I(1+k_{SV}' S_0)$ |
|---------|---------------|--------|--------|--------|-----------|------------------------|
| 0       | 0             |        |        |        |           | 1                      |
| 0.0015  | 0.0002344     | 368    | 368    | 368    | 368       | 1.513587               |
| 0.002   | 0.0003125     | 326    | 328    | 328    | 327.3333  | 1.701629               |
| 0.0025  | 0.0003906     | 293    | 291    | 291    | 291.6667  | 1.909714               |
| 0.003   | 0.0004688     | 266    | 264    | 264    | 264.6667  | 2.104534               |
| 0.0035  | 0.0005469     | 244    | 244    | 242    | 243.3333  | 2.289041               |

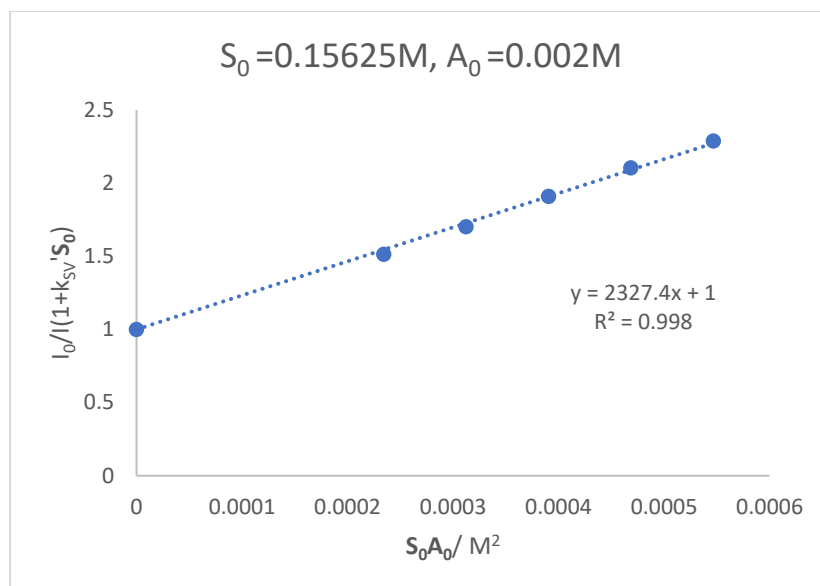

**Figure S5.3.4.** Stern-Volmer plot of luminescence data in **Table S5.3.4**

$\frac{I_0}{1+k_{SV}' S_0}$  was extrapolated from the five data points.

$$k_{obs} \tau_0 = 2327$$

$$S_0 + A_0 = \frac{S_0 A_0 k_{obs} \tau_0}{k_{PCET} \tau_0} + \frac{k_{PCET} \tau_0}{k_{obs} \tau_0} - \frac{1}{K_A} \quad (8)$$

**Table 5.3.5. Solutions to Key Equation 8 and Entry 3 in Table S5.**

|          | $S_0$ (M) | $A_0$ (M) | $S_0 A_0$ (M <sup>2</sup> ) | $S_0 + A_0$ (M) | $k_{obs} \tau_0$ |
|----------|-----------|-----------|-----------------------------|-----------------|------------------|
| <b>1</b> | 0.010     | 0.010     | 0.0001                      | 0.02            | 5740             |
| <b>2</b> | 0.025     | 0.004     | 0.0001                      | 0.029           | 5240             |
| <b>3</b> | 0.0625    | 0.0016    | 0.0001                      | 0.0641          | 3870             |
| <b>4</b> | 0.156     | 0.00064   | 0.0001                      | 0.157           | 2330             |

  

|                | $K_A/M^{-1}$ | $k_{PCET} \tau_0/M^{-1}$ |
|----------------|--------------|--------------------------|
| <b>1&amp;2</b> | 13.1         | 546                      |
| <b>1&amp;3</b> | 13.6         | 530                      |
| <b>1&amp;4</b> | 13.3         | 538                      |
| <b>2&amp;3</b> | 13.8         | 526                      |
| <b>2&amp;4</b> | 13.4         | 538                      |
| <b>3&amp;4</b> | 13.1         | 543                      |
| <b>average</b> | 13.4         | 536                      |

$$\Delta G^\circ_{H-bond} \text{ (kcal/mol)} = -RT \ln K_A = -1.54$$

$$\ln[k_{PCET}(M^{-1}s^{-1})] = \ln[k_{PCET} \tau_0 / \tau_0] = 19.46$$

$$\tau_0 = 1.9 \mu s$$

$$\text{error of } \Delta G^\circ_{H-bond} \text{ (kcal/mol)} = 0.02$$

$$\text{error of } \ln[k_{PCET}(M^{-1}s^{-1})] = 0.02$$

#### 5.4. Entry 4.

Non-PCET quenching of reductant by ketone alone (without acid) is given by **Figure S5.4**. The solution was irradiated at 370nm, and fluorescence was measured at 518nm.

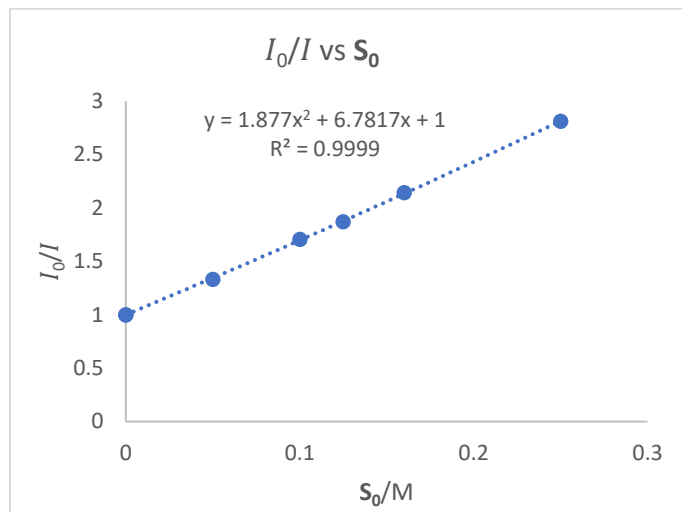

**Figure S5.4.** Stern-Volmer plot of luminescence data of non-PCET quenching by ketone alone

A quadratic relationship gives the best fitting, indicating two quenching mechanisms, one dynamic with rate constant  $k'_{dSV}$ , and one static with constant  $K'_{SSV}$ . Therefore,

$$\frac{I_0}{I} = (1 + k'_{dSV}S_0)(1 + K'_{SSV}S_0)$$

From the steady-state quenching data,  $k'_{dSV}$  and  $K'_{SSV}$  are indistinguishably 6.50 and 0.29. Time-resolved luminescence data (lifetime of reductant **6** \*Ir (III) reduces from 1.9us to 1.2us upon adding 0.05M of ketone) suggest that  $k'_{dSV} = 6.5$

Therefore, the following equation is used:

$$\frac{I_0}{I} = 1 + \frac{k_{obs}\tau_0 S_0 A_0}{1 + k'_{dSV} S_0}$$

The easiest way is to keep  $S_0$  fixed and vary  $A_0$  in each of the four Stern–Volmer analysis. In this way, the static  $K'_{SSV}$  is automatically taken into consideration, and only the dynamic  $k'_{dSV}$  requires treatment. Here the  $I_0$  is not directly measured but extrapolated by the data points. In each Stern–Volmer plot,  $S_0$  is fixed and  $A_0$  is varied, and  $I_0/I$  is plotted against  $S_0 A_0$ . The slope represents  $\frac{k_{obs}\tau_0}{1 + k'_{dSV} S_0}$ , and the corresponding  $k_{obs}\tau_0$  is obtained thereafter.

**Table S5.4.1.  $S_0$  fixed at 0.025M.  $A_0$  varied from 0.003 to 0.006M**

| $A_0/M$ | $S_0A_0/ M^2$ | I/au 1 | I/au 2 | I/au 3 | I/au avg. | $I_0/I$  |
|---------|---------------|--------|--------|--------|-----------|----------|
| 0       | 0             |        |        |        |           | 1        |
| 0.003   | 0.000075      | 473    | 467    | 471    | 470.3333  | 1.371368 |
| 0.004   | 0.0001        | 427    | 426    | 424    | 425.6667  | 1.51527  |
| 0.005   | 0.000125      | 405    | 398    | 399    | 400.6667  | 1.609817 |
| 0.006   | 0.00015       | 373    | 373    | 373    | 373       | 1.729223 |

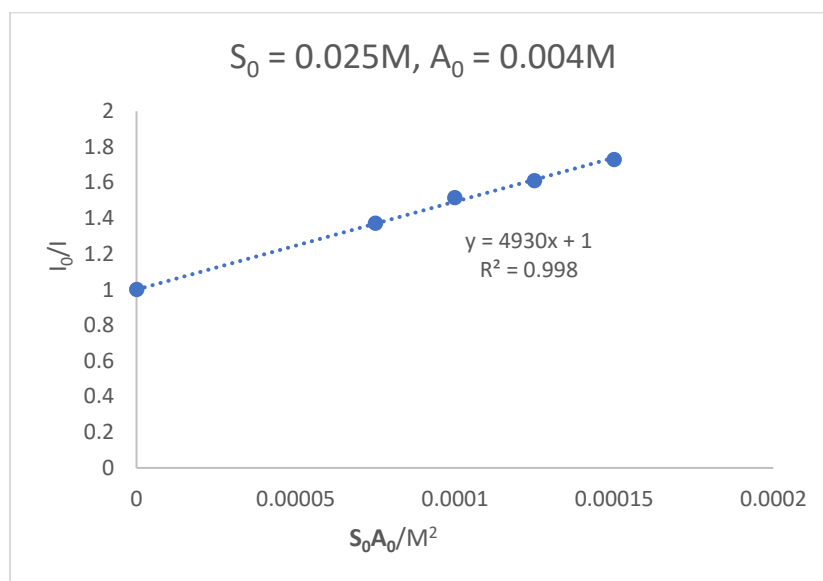

**Figure S5.4.1. Stern-Volmer plot of luminescence data in Table S5.4.1.**

$$k_{obs}\tau_0 = 4930 \times (1 + k'_{dSV}S_0)$$

$$= 4930 \times (1 + 6.5 \times 0.025)$$

$$= 5731$$

**Table S5.4.2.  $S_0$  fixed at 0.04M.  $A_0$  varied from 0.000625 to 0.0025M**

| $A_0/M$  | $S_0A_0/ M^2$ | I/au 1 | I/au 2 | I/au 3 | I/au avg. | $I_0/I$  |
|----------|---------------|--------|--------|--------|-----------|----------|
| 0        | 0             |        |        |        |           | 1        |
| 0.000625 | 0.000025      | 516    | 519    | 519    | 518       | 1.11583  |
| 0.00125  | 0.00005       | 475    | 476    | 477    | 476       | 1.214286 |
| 0.001875 | 0.000075      | 450    | 450    | 451    | 450.3333  | 1.327905 |
| 0.0025   | 0.0001        | 410    | 413    | 416    | 413       | 1.447942 |

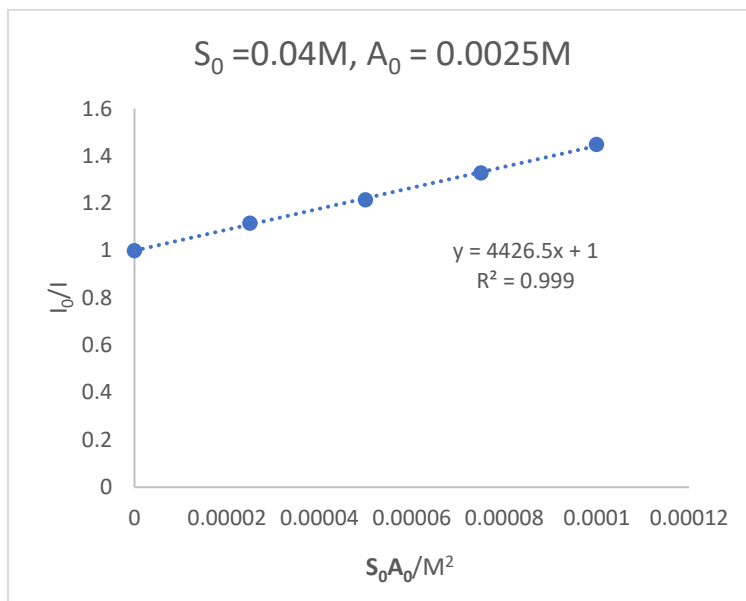

**Figure S5.4.2.** Stern-Volmer plot of luminescence data in **Table S5.4.2.**

$$k_{obs}\tau_0 = 4426 \times (1 + k'_{dSV}S_0)$$

$$= 4426 \times (1 + 6.5 \times 0.04)$$

$$= 5577$$

**Table S5.4.3.  $S_0$  fixed at 0.0625M.  $A_0$  varied from 0.0004 to 0.002M**

| $A_0/M$ | $S_0A_0/ M^2$ | $I/au\ 1$ | $I/au\ 2$ | $I/au\ 3$ | $I/au\ avg.$ | $I_0/I$  |
|---------|---------------|-----------|-----------|-----------|--------------|----------|
| 0       | 0             |           |           |           |              | 1        |
| 0.0004  | 0.000025      | 460       | 459       | 459       | 459.3333     | 1.092888 |
| 0.0008  | 0.00005       | 420       | 421       | 422       | 421          | 1.192399 |
| 0.0012  | 0.000075      | 391       | 392       | 390       | 391          | 1.283887 |
| 0.002   | 0.000125      | 340       | 337       | 341       | 339.3333     | 1.479371 |

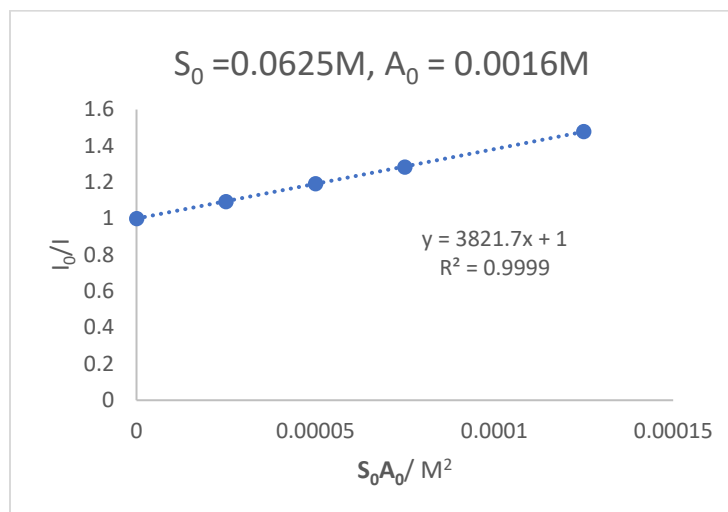

**Figure S5.4.3.** Stern-Volmer plot of luminescence data in **Table S5.4.3.**

$$\begin{aligned}
 k_{obs}\tau_0 &= 3822 \times (1 + k'_{dSV}S_0) \\
 &= 3822 \times (1 + 6.5 \times 0.0625) \\
 &= 5375
 \end{aligned}$$

**Table S5.4.4.  $S_0$  fixed at 0.156M.  $A_0$  varied from 0.00016 to 0.0016M**

| $A_0/M$ | $S_0A_0/ M^2$ | I/au 1 | I/au 2 | I/au 3 | I/au avg. | $I_0/I$  |
|---------|---------------|--------|--------|--------|-----------|----------|
| 0       | 0             |        |        |        |           | 1        |
| 0.00016 | 0.000025      | 312    | 310    | 310    | 310.6667  | 1.049356 |
| 0.00032 | 0.00005       | 295    | 293    | 294    | 294       | 1.108844 |
| 0.00048 | 0.000075      | 280    | 276    | 278    | 278       | 1.172662 |
| 0.00064 | 0.0001        | 263    | 265    | 265    | 264.3333  | 1.233291 |
| 0.0016  | 0.00025       | 207    | 208    | 209    | 208       | 1.567308 |

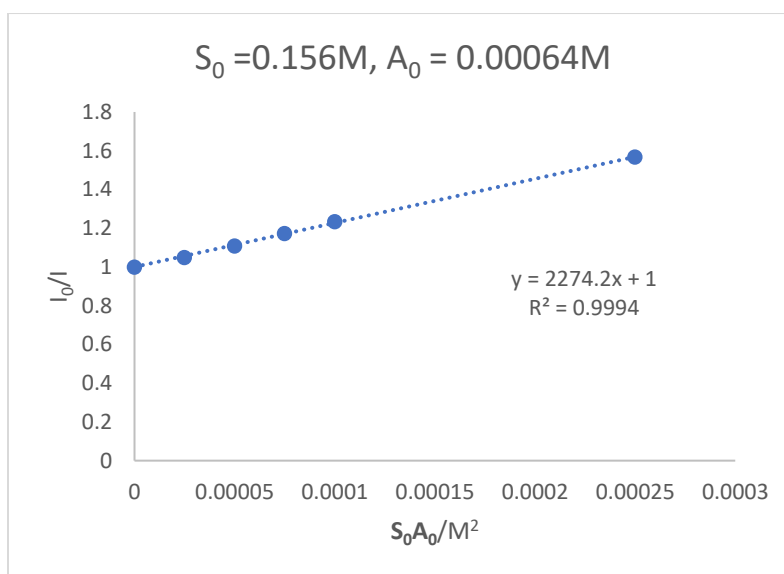

**Figure S5.4.4.** Stern-Volmer plot of luminescence data in **Table S5.4.4.**

$$k_{obs}\tau_0 = 2274 \times (1 + k'_{dSV}S_0)$$

$$= 2274 \times (1 + 6.5 \times 0.156)$$

$$= 4583$$



$$S_0 + A_0 = \frac{S_0 A_0 k_{obs} \tau_0}{k_{PCET} \tau_0} + \frac{k_{PCET} \tau_0}{k_{obs} \tau_0} - \frac{1}{K_A} \quad (8)$$

**Table 5.4.5. Solutions to Key Equation 8 and Entry 4 in Table S5.**

|   | <b>S<sub>0</sub> (M)</b> | <b>A<sub>0</sub> (M)</b>            | <b>S<sub>0</sub>A<sub>0</sub> (M<sup>2</sup>)</b>   | <b>S<sub>0</sub>+A<sub>0</sub> (M)</b> | <b>k<sub>obs</sub>τ<sub>0</sub></b> |
|---|--------------------------|-------------------------------------|-----------------------------------------------------|----------------------------------------|-------------------------------------|
| 1 | 0.025                    | 0.004                               | 0.0001                                              | 0.029                                  | 5730                                |
| 2 | 0.040                    | 0.0025                              | 0.0001                                              | 0.0425                                 | 5580                                |
| 3 | 0.0625                   | 0.0016                              | 0.0001                                              | 0.0641                                 | 5370                                |
| 4 | 0.156                    | 0.00064                             | 0.0001                                              | 0.157                                  | 4580                                |
|   |                          | <b>K<sub>A</sub>/M<sup>-1</sup></b> | <b>k<sub>PCET</sub>τ<sub>0</sub>/M<sup>-1</sup></b> |                                        |                                     |
|   | <b>1&amp;2</b>           | 2.17                                | 2803                                                |                                        |                                     |
|   | <b>1&amp;3</b>           | 1.99                                | 3038                                                |                                        |                                     |
|   | <b>1&amp;4</b>           | 2.08                                | 2927                                                |                                        |                                     |
|   | <b>2&amp;3</b>           | 1.95                                | 3085                                                |                                        |                                     |
|   | <b>2&amp;4</b>           | 2.06                                | 2942                                                |                                        |                                     |
|   | <b>3&amp;4</b>           | 2.11                                | 2887                                                |                                        |                                     |
|   | <b>average</b>           | 2.06                                | 2947                                                |                                        |                                     |

$$\Delta G^{\circ}_{\text{H-bond}} \text{ (kcal/mol)} = -RT \ln K_A = -0.43$$

$$\ln[k_{\text{PCET}}(\text{M}^{-1}\text{s}^{-1})] = \ln[k_{\text{PCET}}\tau_0/\tau_0] = 21.16$$

$$\tau_0 = 1.9 \mu\text{s}$$

$$\text{error of } \Delta G^{\circ}_{\text{H-bond}} \text{ (kcal/mol)} = 0.03 \quad \text{error of } \ln[k_{\text{PCET}}(\text{M}^{-1}\text{s}^{-1})] = 0.03$$

### 5.5. Entry 5.

In all experiments, the solution was irradiated at wavelength 375nm that gives highest emission intensity at 518nm. Steady-state fluorescence quenching data of reductant **6** \*Ir (III) by ketone is plotted in **Figure. S5.5**

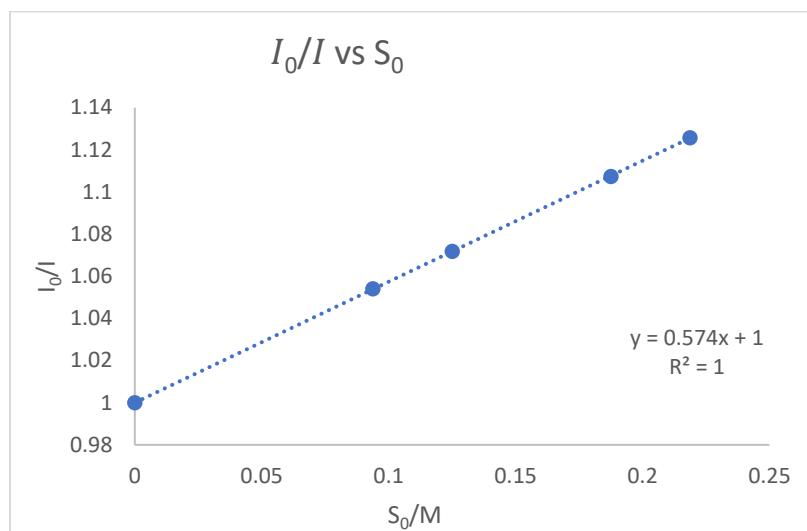

**Figure S5.5.** Stern-Volmer plot of luminescence data of non-PCET quenching by ketone alone

$$k'_{sv} = 0.574$$

Time-resolved fluorometry suggest that the quenching of \*Ir (III) by ketone is dynamic. Therefore, the following equation is used:

$$\frac{I_0}{I} = 1 + \frac{k_{obs}\tau_0 S_0 A_0}{1 + k'_{dsv} S_0}$$

**Table S5.5.1.  $S_0$  fixed at 0.025M.  $A_0$  varied from 0.002 to 0.007M**

| $A_0/M$ | $S_0A_0/ M^2$ | $I/au\ 1$ | $I/au\ 2$ | $I/au\ 3$ | $I/au\ avg.$ | $I_0/I$  |
|---------|---------------|-----------|-----------|-----------|--------------|----------|
| 0       | 0             |           |           |           |              | 1        |
| 0.002   | 0.00005       | 576       | 577       | 574       | 575.6667     | 1.398379 |
| 0.003   | 0.000075      | 510       | 509       | 511       | 510          | 1.578431 |
| 0.004   | 0.0001        | 452       | 452       | 453       | 452.3333     | 1.779661 |
| 0.006   | 0.00015       | 362       | 361       | 360       | 361          | 2.229917 |
| 0.007   | 0.000175      | 334       | 331       | 329       | 331.3333     | 2.429577 |

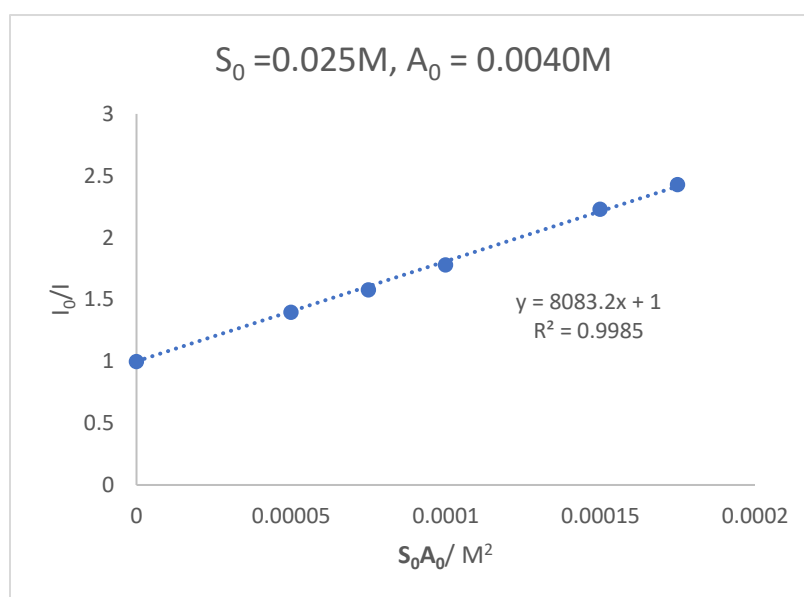

**Figure S5.5.1.** Stern-Volmer plot of luminescence data in **Table S5.5.1.**

$I_0$  was extrapolated from the five data points.

$$k_{obs}\tau_0 = 8083 \times (1 + k'_{d,SV}S_0)$$

$$= 8083 \times (1 + 0.574 \times 0.025)$$

$$= 8198$$

**Table S5.5.2.  $S_0$  fixed at 0.0625M.  $A_0$  varied from 0.0008 to 0.0024M**

| $A_0/M$ | $S_0A_0/ M^2$ | $I/au\ 1$ | $I/au\ 2$ | $I/au\ 3$ | $I/au\ avg.$ | $I_0/I$  |
|---------|---------------|-----------|-----------|-----------|--------------|----------|
| 0       | 0             |           |           |           |              | 1        |
| 0.0008  | 0.00005       | 559       | 559       | 560       | 559.3333     | 1.346246 |
| 0.0012  | 0.000075      | 503       | 502       | 503       | 502.6667     | 1.498011 |
| 0.0016  | 0.0001        | 449       | 448       | 446       | 447.6667     | 1.682055 |
| 0.002   | 0.000125      | 411       | 411       | 411       | 411          | 1.832117 |
| 0.0024  | 0.00015       | 380       | 379       | 379       | 379.3333     | 1.985062 |

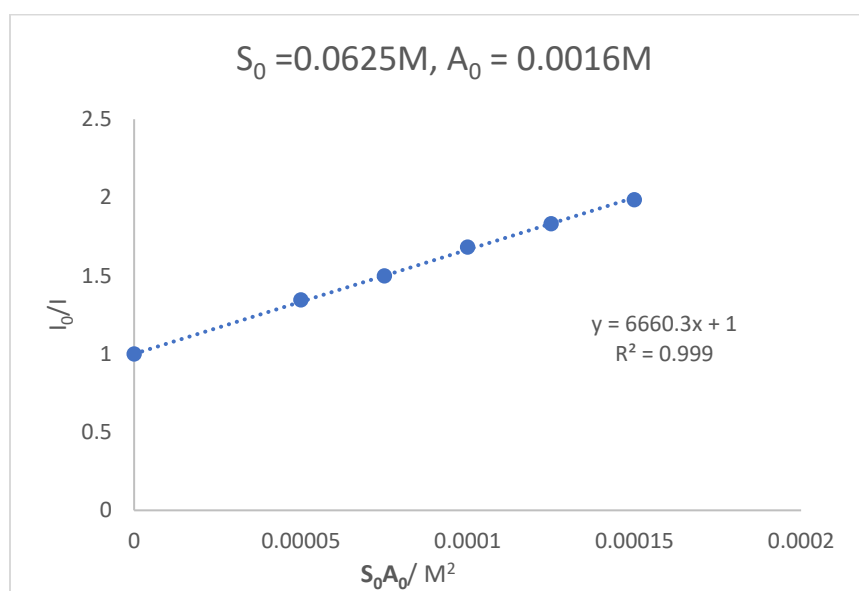

**Figure S5.5.2.** Stern-Volmer plot of luminescence data in **Table S5.5.2.**

$I_0$  was extrapolated from the five data points.

$$k_{obs}\tau_0 = 6660 \times (1 + k'_{dSV}S_0)$$

$$= 6660 \times (1 + 0.574 \times 0.0625)$$

$$= 6899$$

**Table S5.5.3.  $S_0$  fixed at 0.100M.  $A_0$  varied from 0.0008 to 0.0027M**

| $A_0/M$  | $S_0A_0/ M^2$ | $I/au$ 1 | $I/au$ 2 | $I/au$ 3 | $I/au$ avg. | $I_0/I$  |
|----------|---------------|----------|----------|----------|-------------|----------|
| 0        | 0             |          |          |          |             | 1        |
| 0.0008   | 0.00008       | 450      | 451      | 450      | 450.3333    | 1.414508 |
| 0.0012   | 0.00012       | 387      | 388      | 389      | 388         | 1.641753 |
| 0.0016   | 0.00016       | 337      | 335      | 335      | 335.6667    | 1.897716 |
| 0.0024   | 0.00024       | 271      | 270      | 270      | 270.3333    | 2.35635  |
| 0.002732 | 0.000273      | 249      | 250      | 249      | 249.3333    | 2.554813 |

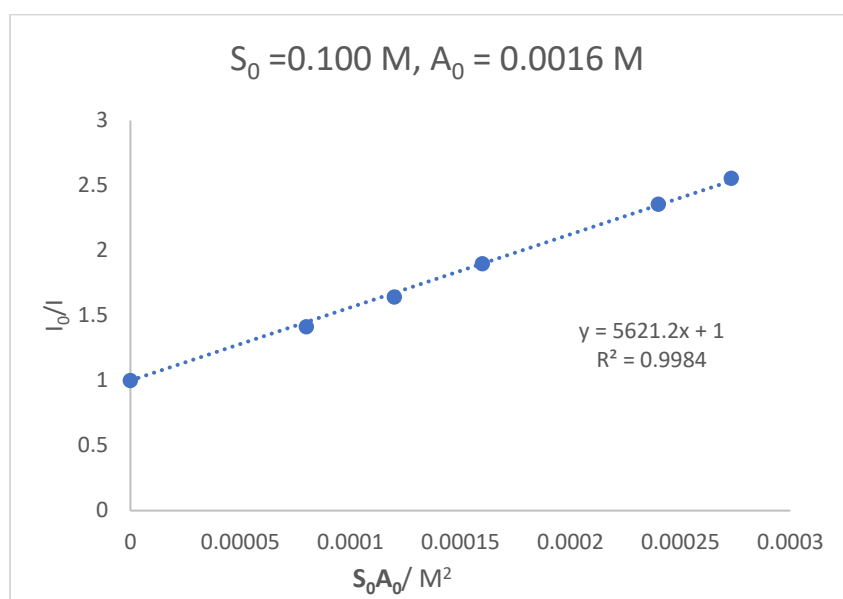

**Figure S5.5.3. Stern-Volmer plot of luminescence data in Table S5.5.3.**

$I_0$  was extrapolated from the five data points.

$$k_{obs}\tau_0 = 5621 \times (1 + k'_{dsv}S_0)$$

$$= 5621 \times (1 + 0.574 \times 0.1)$$

$$= 5944$$

**Table S5.5.4.  $S_0$  fixed at 0.156M.  $A_0$  varied from 0.0008 to 0.0024M**

| $A_0/M$ | $S_0A_0/ M^2$ | $I/au\ 1$ | $I/au\ 2$ | $I/au\ 3$ | $I/au\ avg.$ | $I_0/I$  |
|---------|---------------|-----------|-----------|-----------|--------------|----------|
| 0       | 0             |           |           |           |              | 1        |
| 0.0008  | 0.000125      | 352       | 352       | 350       | 351.3333     | 1.593928 |
| 0.0012  | 0.000188      | 305       | 304       | 304       | 304.3333     | 1.840088 |
| 0.0016  | 0.00025       | 271       | 268       | 269       | 269.3333     | 2.079208 |
| 0.002   | 0.000313      | 236       | 234       | 236       | 235.3333     | 2.379603 |
| 0.0024  | 0.000375      | 211       | 208       | 208       | 209          | 2.679426 |

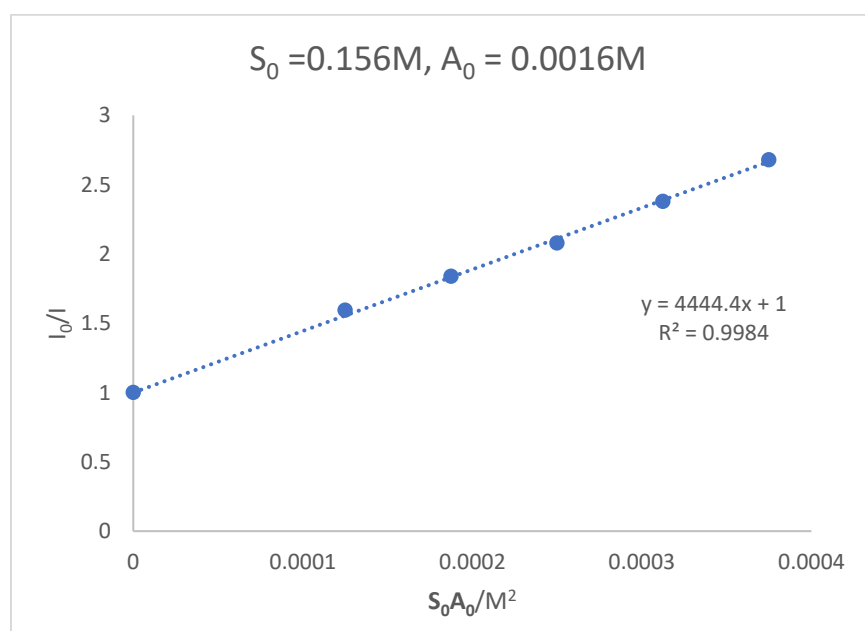

**Figure S5.5.4.** Stern-Volmer plot of luminescence data in **Table S5.5.4.**

$I_0$  was extrapolated from the five data points.

$$\begin{aligned}
 k_{obs}\tau_0 &= 4444 \times (1 + k'_{d\,SV}S_0) \\
 &= 4444 \times (1 + 0.574 \times 0.15625) \\
 &= 484
 \end{aligned}$$

$$S_0 + A_0 = \frac{S_0 A_0 k_{obs} \tau_0}{k_{PCET} \tau_0} + \frac{k_{PCET} \tau_0}{k_{obs} \tau_0} - \frac{1}{K_A} \quad (5)$$

**Table 5.5.5. Solutions to Key Equation 8 and Entry 5 in Table S5.**

|   | $S_0$ (M) | $A_0$ (M) | $S_0 A_0$ (M <sup>2</sup> ) | $S_0 + A_0$ (M) | $k_{obs} \tau_0$ |
|---|-----------|-----------|-----------------------------|-----------------|------------------|
| 1 | 0.025     | 0.004     | 0.0001                      | 0.029           | 8200             |
| 2 | 0.0625    | 0.0016    | 0.0001                      | 0.0641          | 6900             |
| 3 | 0.100     | 0.0016    | 0.00016                     | 0.102           | 5940             |
| 4 | 0.156     | 0.0016    | 0.00025                     | 0.158           | 4840             |

|                | $K_A/M^{-1}$ | $k_{PCET} \tau_0/M^{-1}$ |
|----------------|--------------|--------------------------|
| <b>1&amp;2</b> | 6.3          | 1532                     |
| <b>1&amp;3</b> | 6.2          | 1568                     |
| <b>1&amp;4</b> | 6.4          | 1522                     |
| <b>2&amp;3</b> | 5.9          | 1613                     |
| <b>2&amp;4</b> | 5.8          | 1595                     |
| <b>3&amp;4</b> | 6.4          | 1526                     |
| <b>average</b> | 6.2          | 1559                     |

$$\Delta G^\circ_{H-bond} \text{ (kcal/mol)} = -RT \ln K_A = -1.08$$

$$\ln[k_{PCET} (M^{-1} s^{-1})] = \ln[k_{PCET} \tau_0 / \tau_0] = 20.53$$

$$\tau_0 = 1.9 \mu s$$

$$\text{error of } \Delta G^\circ_{H-bond} \text{ (kcal/mol)} = 0.03$$

$$\text{error of } \ln[k_{PCET} (M^{-1} s^{-1})] = 0.02$$

## 5.6. Entry 6.

Reductant **9** \*Ir (III) was measured to display maximum emission at 500nm, with lifetime  $\tau_0 = 1.82\mu\text{s}$ .

$$E_{1/2}(\text{Ir(IV)/*Ir(III)}) = -2.21\text{V (vs Fc+/Fc)}.$$

In all experiments, the solution was irradiated at 370nm and fluorescence was measured at 500nm.

Non-PCET quenching of reductant by ketone alone (without acid) is given by the following equation:

$$I_0/I = 1 + k'_{sv}S_0$$

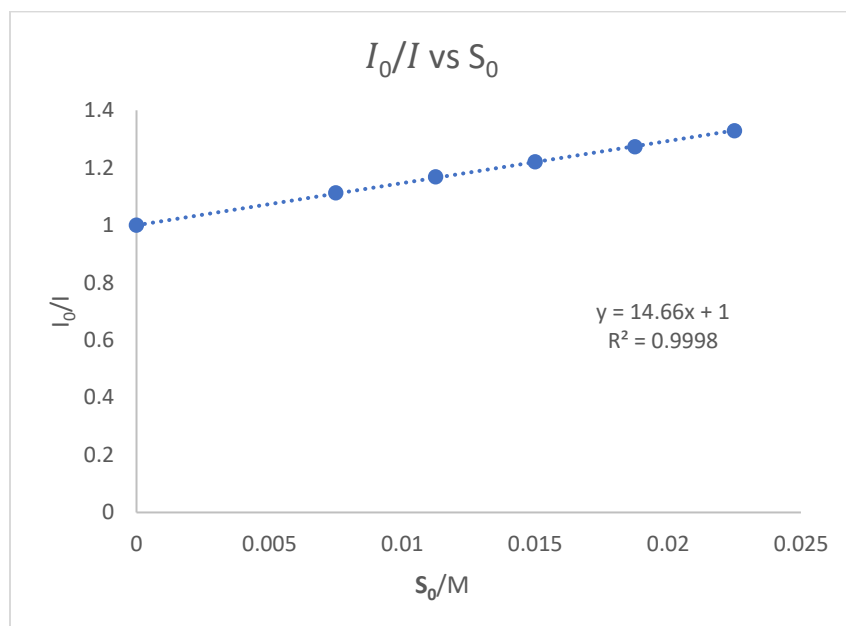

**Figure S5.6.** Stern-Volmer plot of luminescence data of non-PCET quenching by ketone alone

$$k'_{dsv} = 14.66$$

The luminescence of \*Ir (III) is not affected by (PhO)<sub>2</sub>P(O)OH and is dynamically quenched by ketone. Therefore, the following equation is used

$$\frac{I_0}{I} = 1 + \frac{k_{obs}\tau_0 S_0 A_0}{1 + k'_{dsv} S_0}$$



**Table S5.6.1. Luminescence quenching data with  $S_0 = 0.0168M$ ,  $A_0 = 0.003M$ .  $S_0$  fixed at  $0.0168M$ .  $A_0$  varied from  $0.0015$  to  $0.0045M$ .**

| $A_0/M$ | $S_0A_0/ M^2$ | I/au 1 | I/au 2 | I/au 3 | I/au avg. | $I_0/I$  |
|---------|---------------|--------|--------|--------|-----------|----------|
| 0       | 0             |        |        |        |           | 1        |
| 0.0015  | 0.0000252     | 407    | 407    | 407    | 407       | 1.174447 |
| 0.00225 | 0.0000378     | 382    | 382    | 383    | 382.3333  | 1.250218 |
| 0.003   | 0.0000504     | 361    | 362    | 362    | 361.6667  | 1.321659 |
| 0.00375 | 0.000063      | 342    | 342    | 342    | 342       | 1.397661 |
| 0.0045  | 0.0000756     | 320    | 321    | 320    | 320.3333  | 1.492196 |

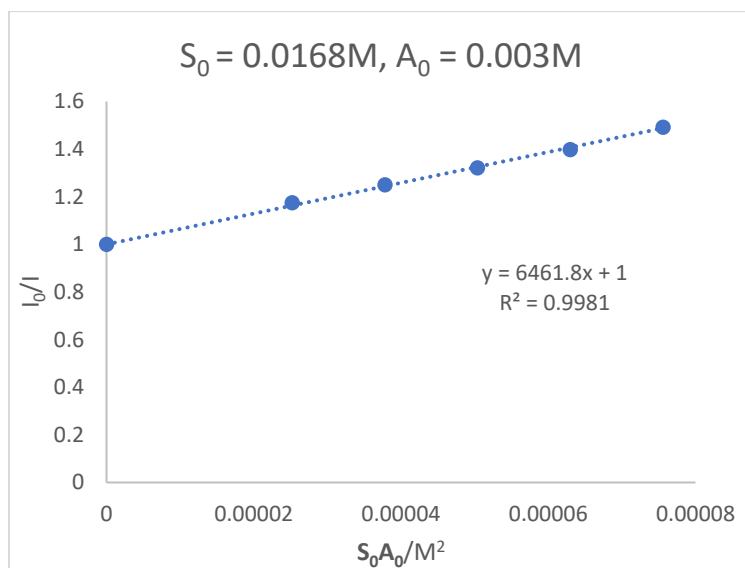

**Figure S5.6.1. Stern-Volmer plot of luminescence data in Table S5.6.1.**

$I_0$  was extrapolated from the five data points.

$$\begin{aligned}
 k_{obs}\tau_0 &= 6461.8 \times (1 + k'_{dsv}S_0) \\
 &= 6461.8 \times (1 + 14.66 \times 0.0168) \\
 &= 8053
 \end{aligned}$$

Substitute  $K_A = 6.3$  (from entry 1),  $k_{obs}\tau_0 = 8053$  into the equation

$$\begin{aligned}
 S_0 + A_0 &= \frac{S_0A_0 k_{obs}\tau_0}{k_{PCET}\tau_0} + \frac{k_{PCET}\tau_0}{k_{obs}\tau_0} - \frac{1}{K_A} \\
 0.0168 + 0.003 &= \frac{0.0168 \times 0.003 \times 8053}{k_{PCET}\tau_0} + \frac{k_{PCET}\tau_0}{8053} - \frac{1}{6.3}
 \end{aligned}$$

$$k_{PCET}\tau_0 = 145$$

**Table S5.6.2. Luminescence quenching data with  $S_0 = 0.028M$ ,  $A_0=0.003M$ .  $S_0$  fixed at 0.028M.  $A_0$  varied from 0.0015 to 0.0045M.**

| $A_0/M$ | $S_0A_0/ M^2$ | I/au 1 | I/au 2 | I/au 3 | I/au avg. | $I_0/I$  |
|---------|---------------|--------|--------|--------|-----------|----------|
| 0       | 0             |        |        |        |           | 1        |
| 0.0015  | 0.0000417     | 248    | 248    | 249    | 248.3333  | 1.26443  |
| 0.00225 | 0.00006255    | 228    | 228    | 228    | 228       | 1.377193 |
| 0.003   | 0.0000834     | 209    | 209    | 208    | 208.6667  | 1.504792 |
| 0.00375 | 0.00010425    | 191    | 191    | 193    | 191.6667  | 1.638261 |
| 0.0045  | 0.0001251     | 177    | 177    | 177    | 177       | 1.774011 |

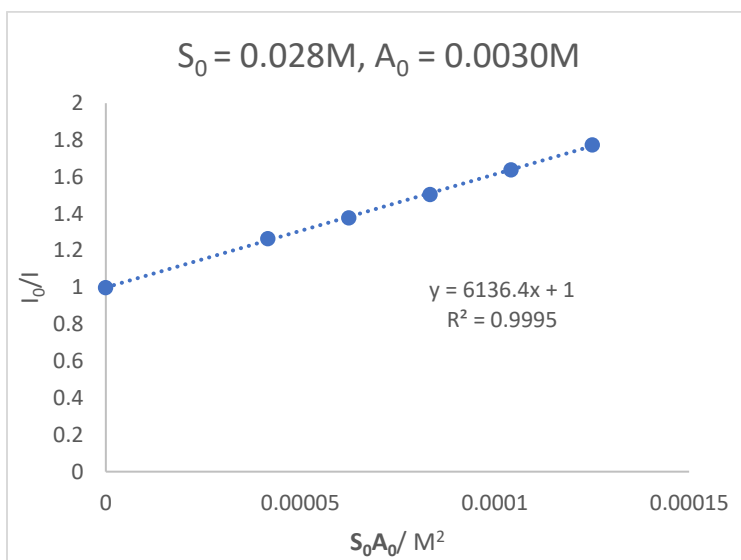

**Figure S5.6.2. Stern-Volmer plot of luminescence data in Table S5.6.2.**

$I_0$  was extrapolated from the five data points.

$$\begin{aligned}
 k_{obs}\tau_0 &= 6136.4 \times (1 + k'_{dSV}S_0) \\
 &= 6136.4 \times (1 + 14.66 \times 0.028) \\
 &= 8637
 \end{aligned}$$

Substitute  $K_A = 6.3$  (from **entry 1**),  $k_{obsSV} = 8053$  into the equation

$$\begin{aligned}
 S_0 + A_0 &= \frac{S_0A_0 k_{obs}\tau_0}{k_{PCET}\tau_0} + \frac{k_{PCET}\tau_0}{k_{obs}\tau_0} - \frac{1}{K_A} \\
 0.0278 + 0.003 &= \frac{0.0278 \times 0.003 \times 8637}{k_{PCET}\tau_0} + \frac{k_{PCET}\tau_0}{8637} - \frac{1}{6.3}
 \end{aligned}$$

$$k_{\text{PCET}}\tau_0 = 1656$$

$$k_{\text{PCET}}\tau_0 \text{ average} = (1656 + 1456)/2 = 1560$$

$$\Delta G^\circ_{\text{H-bond}} (\text{kcal/mol}) = -RT \ln K_A = -1.09 \text{ (same as in entry 1)}$$

$$\ln[k_{\text{PCET}}(\text{M}^{-1}\text{s}^{-1})] = \ln[k_{\text{PCET}}\tau_0/\tau_0] = 20.58$$

$$\tau_0 = 1.82 \mu\text{s}$$

$$\text{error of } \Delta G^\circ_{\text{H-bond}} (\text{kcal/mol}) = 0.05$$

$$\text{error of } \ln[k_{\text{PCET}} (\text{M}^{-1}\text{s}^{-1})] = 0.10$$

### 5.7. Entry 7.

Reductant **8** \*Ir (III) was measured to display maximum emission at 491nm, with lifetime  $\tau_0 = 1.61\mu\text{s}$ .

$$E_{1/2}(\text{Ir(IV)/*Ir(III)}) = -2.28\text{V (vs Fc+/Fc)}.$$

Ketone does not quench the luminescence of reductant **8** \*Ir (III). Non-PCET quenching of reductant by acid alone (without ketone) is given by the following equation:

$$\frac{I_0}{I} = 1 + k''_{dSV} A_0$$

In all experiments, the solution was irradiated at wavelength (370nm) that gives highest emission intensity at 491nm.

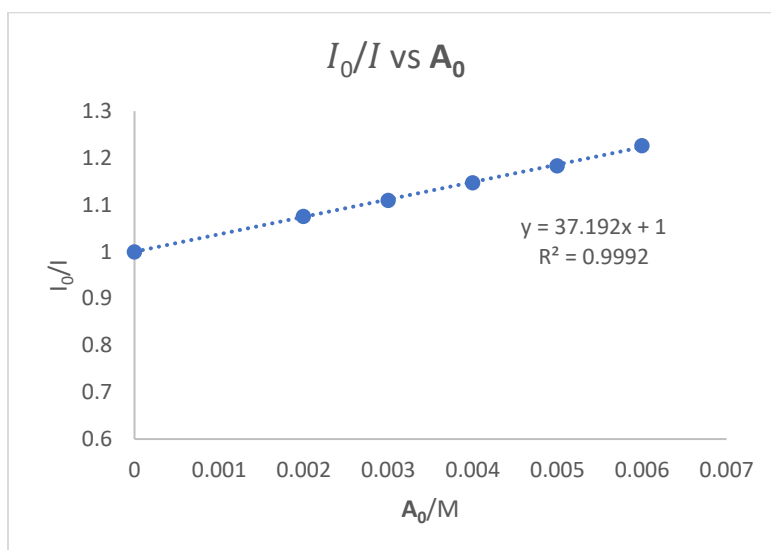

**Figure S5.7.** Stern-Volmer plot of luminescence data of non-PCET quenching by acid alone

$$k''_{dSV} = 37.2$$

Time-resolved luminescence suggests that the non-PCET quenching by acid is dynamic, therefore, the following equation is used:

$$\frac{I_0}{I} = 1 + (k''_{SV} + k_{obs} \tau_0 S_0) A_0$$

**Table S5.7.1.** Luminescence quenching data with  $S_0 = 0.025\text{M}$ ,  $A_0 = 0.0023\text{M}$ .  $S_0$  fixed at  $0.025\text{M}$ .  $A_0$  varied from  $0.0015$  to  $0.003\text{M}$

| $A_0/\text{M}$ | $S_0A_0/\text{M}^2$ | I/au 1 | I/au 2 | I/au 3 | I/au avg. | $I_0/I$  |
|----------------|---------------------|--------|--------|--------|-----------|----------|
| 0              | 0                   |        |        |        |           | 1        |
| 0.0015         | 9.375E-05           | 500    | 501    | 493    | 498       | 1.449799 |
| 0.002          | 0.000125            | 454    | 454    | 455    | 454.3333  | 1.589142 |
| 0.0025         | 0.0001563           | 409    | 407    | 413    | 409.6667  | 1.762408 |
| 0.003          | 0.0001875           | 374    | 378    | 376    | 376       | 1.920213 |

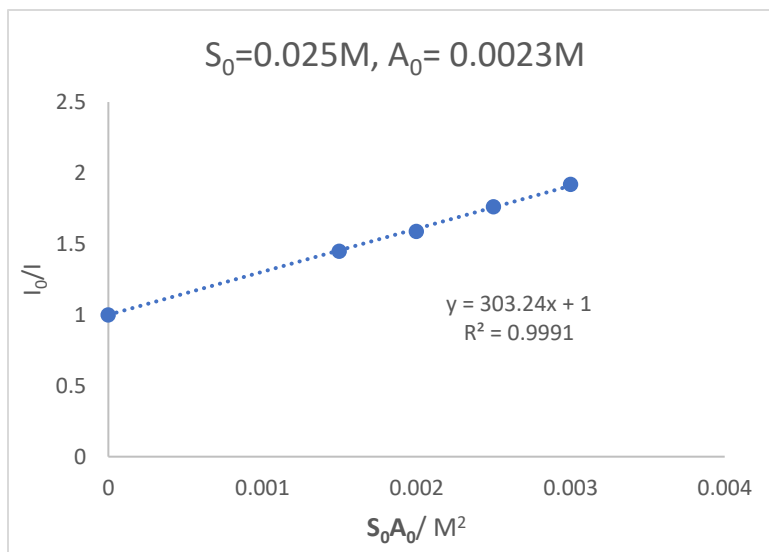

**Figure S5.7.1.** Stern-Volmer plot of luminescence data in **Table S5.7.1**.

$I_0$  was extrapolated from the four data points.

$\frac{I_0}{I}$  against  $A_0$  is plotted to fit  $\frac{I_0}{I} = 1 + (k''_{SV} + k_{obs}\tau_0 S_0)A_0$  in which  $k''_{d.SV} = 37.2$  refers to the dynamic quenching of reductant by acid alone

$$k''_{SV} + k_{obs}\tau_0 S_0 = 303.24$$

$$37.2 + k_{obs}\tau_0 \times 0.025 = 303.24, k_{obs}\tau_0 = 9200$$

Substitute  $S_0 = 0.025$ ,  $A_0 = 0.0023$ ,  $K_A = 92$  (from **entry 2**),  $k_{obs}\tau_0 = 9200$  into the equation

$$S_0 + A_0 = \frac{S_0 A_0 k_{obs}\tau_0}{k_{PCET}\tau_0} + \frac{k_{PCET}\tau_0}{k_{obs}\tau_0} - \frac{1}{K_A}$$

$$0.025 + 0.00225 = \frac{0.025 \times 0.00225 \times 9200}{k_{PCET}\tau_0} + \frac{k_{PCET}\tau_0}{9200} - \frac{1}{92}$$

$$k_{PCET}\tau_0 = 337$$

**Table S5.7.2.** Luminescence quenching data with  $S_0 = 0.050M$ ,  $A_0 = 0.0010M$ .  $S_0$  fixed at  $0.050M$ .  $A_0$  varied from  $0.00025$  to  $0.0015M$

| $A_0/M$ | $S_0A_0/M^2$ | I/au 1 | I/au 2 | I/au 3 | I/au avg. | $I_0/I$  |
|---------|--------------|--------|--------|--------|-----------|----------|
| 0       | 0            |        |        |        |           | 1        |
| 0.00025 | 0.0000125    | 542    | 543    | 540    | 541.6667  | 1.085538 |
| 0.0005  | 0.000025     | 505    | 500    | 507    | 504       | 1.166667 |
| 0.00075 | 0.0000375    | 470    | 468    | 466    | 468       | 1.25641  |
| 0.001   | 0.00005      | 441    | 438    | 440    | 439.6667  | 1.337377 |
| 0.0015  | 0.000075     | 400    | 402    | 398    | 400       | 1.47     |

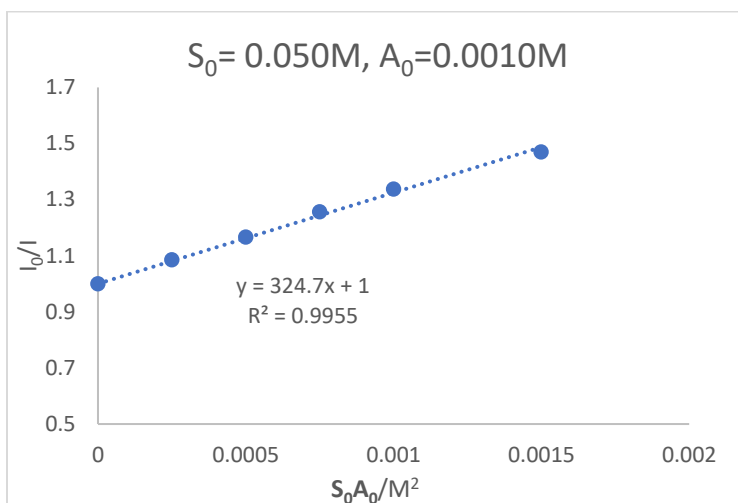

**Figure S5.7.2.** Stern-Volmer plot of luminescence data in **Table S5.7.2.**

$I_0$  was extrapolated from the five data points.

$\frac{I_0}{I}$  against  $A_0$  is plotted to fit  $\frac{I_0}{I} = 1 + (k''_{SV} + k_{obs}\tau_0 S_0)A_0$  in which  $k''_{dSV} = 37.2$  refers to the dynamic quenching of reductant **8** \*Ir (III) by  $(PhO)_2P(O)OH$

$$k''_{SV} + k_{obs}\tau_0 S_0 = 324.7$$

$$37.2 + k_{obs}\tau_0 \times 0.05 = 324.7, k_{obs}\tau_0 = 5745$$

Substitute  $S_0=0.050$ ,  $A_0=0.0010$ ,  $K_A= 92$ ,  $k_{obs}\tau_0 = 5745$  into the equation

$$S_0 + A_0 = \frac{S_0 A_0 k_{obs} \tau_0}{k_{PCET} \tau_0} + \frac{k_{PCET} \tau_0}{k_{obs} \tau_0} - \frac{1}{K_A}$$

$$0.05 + 0.001 = \frac{0.05 \times 0.001 \times 5745}{k_{PCET} \tau_0} + \frac{k_{PCET} \tau_0}{5745} - \frac{1}{92}$$

$$k_{PCET} \tau_0 = 351$$

Average the two values of  $k_{PCET} \tau_0 = (337+351)/2 = 344$

$$\Delta G^\circ_{\text{H-bond}} (\text{kcal/mol}) = -RT \ln K_A = -2.68 \text{ (same as in entry 2)}$$

$$\ln[k_{PCET} (\text{M}^{-1} \text{s}^{-1})] = \ln[k_{PCET} \tau_0 / \tau_0] = 19.03$$

$$\tau_0 = 1.61 \mu\text{s}$$

$$\text{error of } \Delta G^\circ_{\text{H-bond}} (\text{kcal/mol}) = 0.04 \text{ (same as in entry 2)}$$

$$\text{error of } \ln[k_{PCET} (\text{M}^{-1} \text{s}^{-1})] = 0.03$$

### 5.8. Entry 8.

Ketone does not quench luminescence of reductant **8** \*Ir (III). Time-resolved luminescence suggests that the non-PCET quenching by acid is dynamic, therefore, the following equation is used:

$$\frac{I_0}{I} = 1 + (k''_{SV} + k_{obs}\tau_0 S_0)A_0$$

$$k''_{dSV} = 37.2 \text{ (entry 7)}$$

In all experiments, the solution was irradiated at 365nm, and fluorescence was measured at 491nm.

**Table S5.8.1. Luminescence quenching data with  $S_0 = 0.0250M$ ,  $A_0 = 0.0016M$ .  $S_0$  fixed at  $0.025M$ .  $A_0$  varied from  $0.0004$  to  $0.0024M$**

| $A_0/M$ | $S_0A_0/M^2$ | I/au 1 | I/au 2 | I/au 3 | I/au avg. | $I_0/I$  |
|---------|--------------|--------|--------|--------|-----------|----------|
| 0       |              |        |        |        |           | 1        |
| 0.0004  | 0.00001      | 596    | 600    | 600    | 598.6667  | 1.150891 |
| 0.0012  | 0.00003      | 470    | 471    | 473    | 471.3333  | 1.46181  |
| 0.0016  | 0.00004      | 436    | 435    | 434    | 435       | 1.583908 |
| 0.0024  | 0.00006      | 362    | 363    | 365    | 363.3333  | 1.89633  |

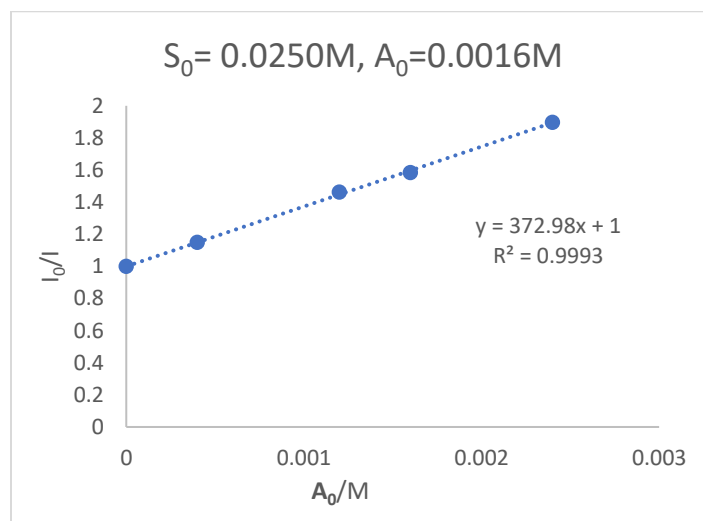

**Figure S5.8.1.** Stern-Volmer plot of luminescence data in **Table S5.8.1.**

$I_0$  was extrapolated from the five data points.

$$k''_{SV} + k_{obs}\tau_0 S_0 = 372.98$$



$$37.2 + k_{obs}\tau_0 \times 0.05 = 372.98, k_{obs}\tau_0 = 13422$$

Substitute  $S_0=0.025$ ,  $A_0=0.0016$ ,  $K_A=13.4$  (from **entry 3**),  $k_{obs}\tau_0 = 13422$  into the equation

$$S_0 + A_0 = \frac{S_0 A_0 k_{obs}\tau_0}{k_{PCET}\tau_0} + \frac{k_{PCET}\tau_0}{k_{obs}\tau_0} - \frac{1}{K_A}$$

$$0.025 + 0.0016 = \frac{0.025 \times 0.0016 \times 13422}{k_{PCET}\tau_0} + \frac{k_{PCET}\tau_0}{13422} - \frac{1}{13.4}$$

$$k_{PCET}\tau_0 = 1353$$

**Table S5.8.2. Luminescence quenching data with  $S_0=0.100M$ ,  $A_0=0.0016M$ .  $S_0$  fixed at  $0.025M$ .  $A_0$  varied from  $0.0004$  to  $0.0006M$**

| $A_0/M$ | $S_0A_0/M^2$ | I/au 1 | I/au 2 | I/au 3 | I/au avg. | $I_0/I$  |
|---------|--------------|--------|--------|--------|-----------|----------|
| 0       |              |        |        |        |           | 1        |
| 0.0004  | 0.00004      | 434    | 431    | 431    | 432       | 1.331019 |
| 0.0008  | 0.00008      | 348    | 350    | 351    | 349.6667  | 1.644423 |
| 0.0012  | 0.00012      | 291    | 291    | 290    | 290.6667  | 1.978211 |
| 0.0016  | 0.00016      | 249    | 250    | 250    | 249.6667  | 2.303071 |
| 0.002   | 0.0002       | 216    | 217    | 214    | 215.6667  | 2.666151 |
| 0.0006  | 0.00006      | 383    | 383    | 383    | 383       | 1.501305 |

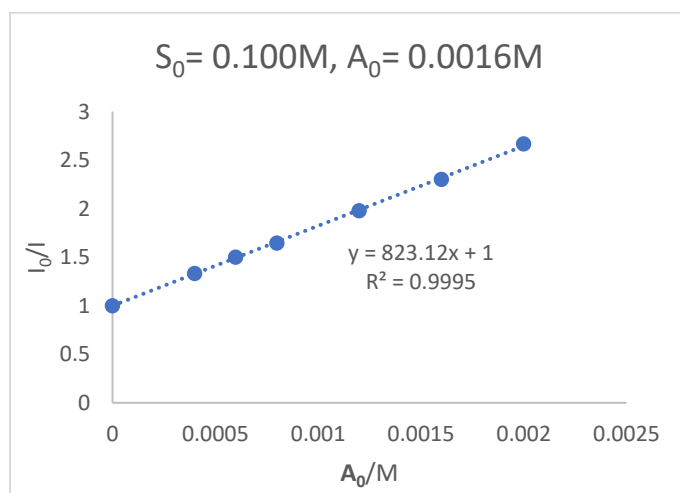

**Figure S5.8.2.** Stern-Volmer plot of luminescence data in **Table S5.8.2.**

$I_0$  was extrapolated from the five data points.

$$k''_{SV} + k_{obs}\tau_0 S_0 = 823.12$$

$$37.2 + k_{obs}\tau_0 \times 0.1 = 823.12, k_{obs}\tau_0 = 7856$$

Substitute  $S_0=0.100$ ,  $A_0=0.0016$ ,  $K_A= 13.4$  (from entry 3),  $k_{obs\,SV} = 7856$  into the equation

$$S_0 + A_0 = \frac{S_0 A_0 k_{obs}\tau_0}{k_{PCET}\tau_0} + \frac{k_{PCET}\tau_0}{k_{obs}\tau_0} - \frac{1}{K_A}$$

$$0.1 + 0.0016 = \frac{0.1 \times 0.0016 \times 7856}{k_{PCET}\tau_0} + \frac{k_{PCET}\tau_0}{7856} - \frac{1}{13.4}$$

$$k_{PCET}\tau_0 = 1377$$

Average the two values of  $k_{PCET}\tau_0 = (1353+1377)/2 = 1365$

$$\Delta G^\circ_{H\text{-bond}} \text{ (kcal/mol)} = -RT\ln K_A = -1.54 \text{ (same as in entry 3)}$$

$$\ln[k_{PCET}(\text{M}^{-1}\text{s}^{-1})] = \ln[k_{PCET}\tau_0/\tau_0] = 20.56$$

$$\tau_0 \text{ [Irppy3]} = 1.61\mu\text{s}$$

$$\text{error of } \Delta G^\circ_{H\text{-bond}} \text{ (kcal/mol)} = 0.01 \text{ (same as in entry 3)}$$

$$\text{error of } \ln[k_{PCET}(\text{M}^{-1}\text{s}^{-1})] = 0.01 \text{ (same as in entry 3)}$$

## 5.9. Entry 9.

Reductant **7** \*Ir (III) was measured to display maximum emission at 491nm, with lifetime  $\tau_0 = 2.02\mu\text{s}$ .

$$E_{1/2}(\text{Ir(IV)}/^*\text{Ir(III)}) = -1.92\text{V (vs Fc}^+/\text{Fc)}.$$

Acid does not quench the luminescence of reductant **7** \*Ir (III). Non-PCET quenching of reductant by ketone alone (without acid) is given by the following equation:

$$I_0/I = 1 + k'_{sv}S_0$$

In all experiments, the solution was irradiated at wavelength (370nm) that gives highest emission intensity at 491nm.

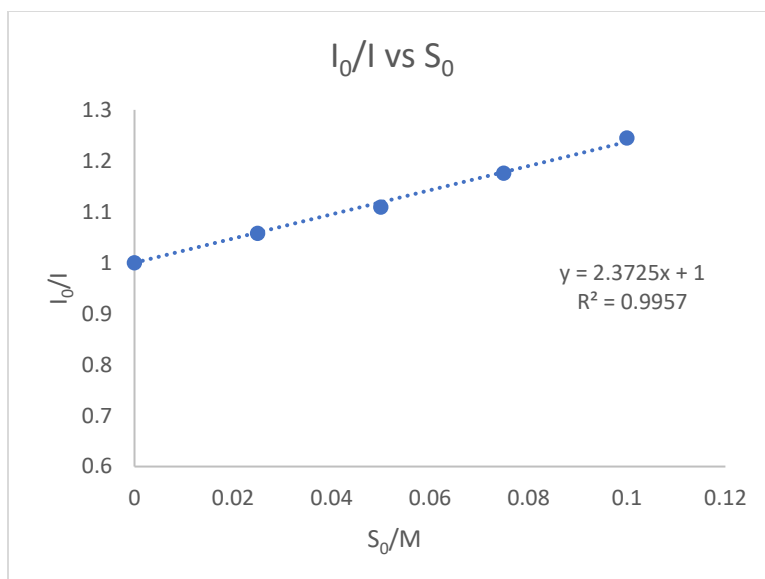

**Figure S5.9.** Stern-Volmer plot of luminescence data of non-PCET quenching by ketone alone

$A_0 = 0$ ,  $S_0$  is varied from 0 to 0.10M.

$$k'_{sv} = 2.37$$

Time-resolved luminescence suggests that the non-PCET quenching by ketone is static. Therefore, the following equation is used:

$$\frac{I_0/I}{1 + k'_{sv}S_0} = 1 + k_{obs}\tau_0S_0A_0$$

**Table S5.9.1. Luminescence quenching data with  $S_0= 0.0250\text{M}$ ,  $A_0= 0.004\text{M}$ .  $A_0$  fixed at  $0.004\text{M}$ .  $S_0$  varied from  $0.0218$  to  $0.0312\text{M}$**

| $S_0/\text{M}$ | $S_0A_0/\text{M}^2$ | I/au 1 | I/au 2 | I/au 3 | I/au avg. | $I_0/I$    | $I_0/I(1+k_{sv}' S_0)$ |
|----------------|---------------------|--------|--------|--------|-----------|------------|------------------------|
| 0              | 0                   |        |        |        |           | 1          | 1                      |
| 0.021875       | 8.75E-05            | 405    | 403    | 403    | 403.6667  | 1.21387283 | 1.153923               |
| 0.025          | 0.0001              | 401    | 392    | 393    | 395.3333  | 1.23946037 | 1.169992               |
| 0.028125       | 0.000113            | 387    | 387    | 382    | 385.3333  | 1.2716263  | 1.192004               |
| 0.03125        | 0.000125            | 376    | 372    | 377    | 375       | 1.30666667 | 1.216388               |

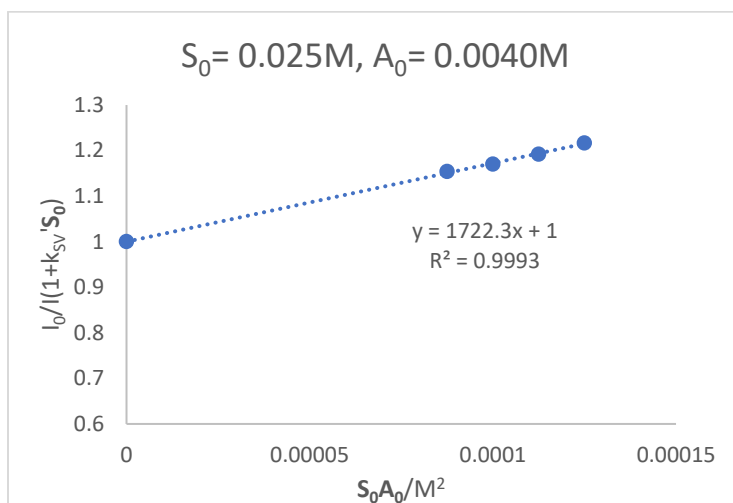

**Figure S5.9.1.** Stern-Volmer plot of luminescence data in **Table S5.9.1**.

$I_0$  was extrapolated from the four data points.

$$k_{obs}\tau_0 = 1722$$

Substitute  $S_0= 0.025$ ,  $A_0= 0.004$ ,  $K_A= 6.3$  (from **entry 1**),  $k_{obs\ SV} = 1722$  into the equation

$$S_0 + A_0 = \frac{S_0A_0 k_{obs}\tau_0}{k_{PCET}\tau_0} + \frac{k_{PCET}\tau_0}{k_{obs}\tau_0} - \frac{1}{K_A}$$

$$0.025 + 0.004 = \frac{0.025 \times 0.004 \times 1722}{k_{PCET}\tau_0} + \frac{k_{PCET}\tau_0}{1722} - \frac{1}{6.3}$$

$$k_{PCET}\tau_0 = 322$$

**Table S5.9.2. Luminescence quenching data with  $S_0=0.050M$ ,  $A_0=0.0015M$ .  $S_0$  fixed at  $0.050M$ .  $A_0$  varied from  $0.0005$  to  $0.0025M$**

| $A_0/M$ | $S_0A_0/M^2$ | I/au 1 | I/au 2 | I/au 3 | I/au avg. | $I_0/(1+k_{SV}' S_0)$ |
|---------|--------------|--------|--------|--------|-----------|-----------------------|
| 0       | 0            |        |        |        |           | 1                     |
| 0.0005  | 0.000025     | 175    | 175    | 174    | 174.6667  | 1.03625954            |
| 0.001   | 0.00005      | 167    | 167    | 168    | 167.3333  | 1.08167331            |
| 0.0015  | 0.000075     | 161    | 160    | 160    | 160.3333  | 1.12889813            |
| 0.002   | 0.0001       | 155    | 154    | 154    | 154.3333  | 1.17278618            |
| 0.0025  | 0.000125     | 150    | 150    | 149    | 149.6667  | 1.20935412            |

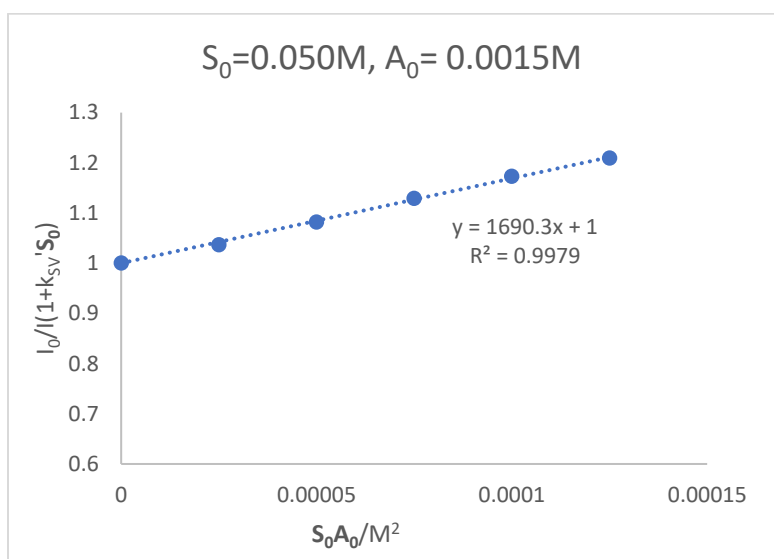

**Figure S5.9.2.** Stern-Volmer plot of luminescence data in **Table S5.9.2.**

$\frac{I_0}{1+k_{SV}' S_0}$  was extrapolated from the five data points.

$$k_{obs}\tau_0 = 1690$$

Substitute  $S=0.05$ ,  $A=0.0015$ ,  $K_A=6.3$  (from entry 1),  $k_{obs}\tau_0 = 1690$  into the equation

$$S_0 + A_0 = \frac{S_0 A_0 k_{obs}\tau_0}{k_{PCET}\tau_0} + \frac{k_{PCET}\tau_0}{k_{obs}\tau_0} - \frac{1}{K_A}$$

$$0.05 + 0.0015 = \frac{0.05 \times 0.0015 \times 1690}{k_{PCET}\tau_0} + \frac{k_{PCET}\tau_0}{1690} - \frac{1}{6.3}$$

$$k_{\text{PCET}}\tau_0 = 354$$

Average the two values of  $k_{\text{PCET}}\tau_0 = (322+354)/2 = 338$

$$\Delta G^\circ_{\text{H-bond}} (\text{kcal/mol}) = -RT\ln K_A = -1.09 \text{ (same as in entry1)}$$

$$\ln[k_{\text{PCET}}(\text{M}^{-1}\text{s}^{-1})] = \ln[k_{\text{pcet}}\tau_0/\tau_0] = 18.93$$

$$\tau_0 = 2.02\text{us}$$

$$\text{error of } \Delta G^\circ_{\text{H-bond}} (\text{kcal/mol}) = 0.05 \text{ (same as in entry1)}$$

$$\text{error of } \ln[k_{\text{PCET}}(\text{M}^{-1}\text{s}^{-1})] = 0.06$$

### 5.10. Entry 10.

Neither ketone nor acid quenches the luminescence of reductant **7** \*Ir (III). Therefore, the following equation is used:

$$I_0/I = 1 + k_{obsSV}S_0A_0$$

In all experiments, the solution was irradiated at 370nm, and fluorescence was measured at 491nm.

**Table S5.10.1. Luminescence quenching data with  $S_0=0.050M$ ,  $A_0=0.0020M$ .  $S_0$  fixed at  $0.050M$ .  $A_0$  varied from  $0.0005$  to  $0.003M$**

| $A_0/M$ | $S_0A_0/M^2$ | I/au 1 | I/au 2 | I/au 3 | I/au avg.  | $I_0/I$  |
|---------|--------------|--------|--------|--------|------------|----------|
| 0       | 0            |        |        |        |            | 1        |
| 0.0005  | 0.000025     | 611    | 608    | 611    | 610        | 1.014754 |
| 0.001   | 0.00005      | 604    | 598    | 602    | 601.333333 | 1.029379 |
| 0.0015  | 0.000075     | 592    | 592    | 592    | 592        | 1.045608 |
| 0.002   | 0.0001       | 586    | 584    | 582    | 584        | 1.059932 |
| 0.0025  | 0.000125     | 576    | 576    | 574    | 575.333333 | 1.075898 |
| 0.003   | 0.00015      | 568    | 567    | 569    | 568        | 1.089789 |

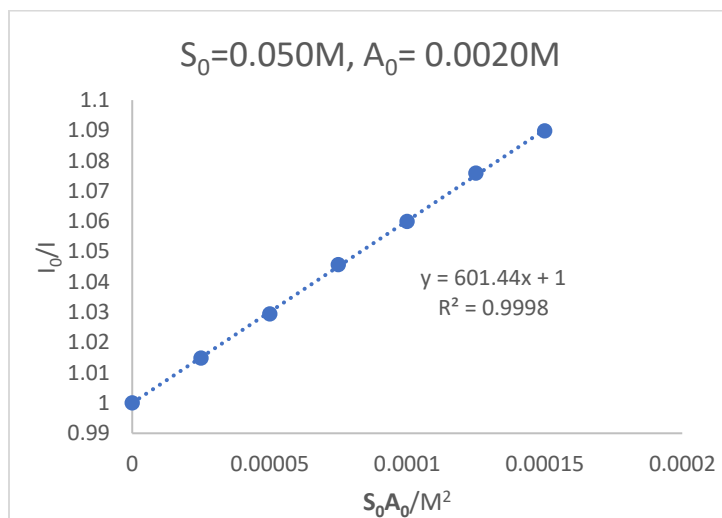

**Figure S5.10.1.** Stern-Volmer plot of luminescence data in **Table S5.10.1.**

$I_0$  was extrapolated from the six data points.

$$k_{obs}\tau_0 = 601$$

Substitute  $S_0 = 0.05$ ,  $A_0 = 0.002$ ,  $K_A = 92$  (from **entry 2**),  $k_{obs}\tau_0 = 601$  into the equation

$$S_0 + A_0 = \frac{S_0 A_0 k_{obs}\tau_0}{k_{PCET}\tau_0} + \frac{k_{PCET}\tau_0}{k_{obs}\tau_0} - \frac{1}{K_A}$$

$$0.05 + 0.002 = \frac{0.05 \times 0.002 \times 601}{k_{PCET}\tau_0} + \frac{k_{PCET}\tau_0}{601} - \frac{1}{92}$$

$$k_{PCET}\tau_0 = 37$$

**Table S5.10.2.** Luminescence quenching data with  $S_0 = 0.0625M$ ,  $A_0 = 0.0030M$ .  $S_0$  fixed at  $0.0625M$ .  $A_0$  varied from  $0.001$  to  $0.005M$

| $A_0/M$ | $S_0A_0/M^2$ | I/au 1 | I/au 2 | I/au 3 | I/au avg. | $I_0/I$    |
|---------|--------------|--------|--------|--------|-----------|------------|
| 0       | 0            |        |        |        |           | 1          |
| 0.001   | 0.0000625    | 430    | 440    | 433    | 434.3333  | 1.03607061 |
| 0.002   | 0.000125     | 419    | 422    | 421    | 420.6667  | 1.06973059 |
| 0.003   | 0.0001875    | 405    | 406    | 405    | 405.3333  | 1.11019737 |
| 0.004   | 0.00025      | 388    | 389    | 387    | 388       | 1.15979381 |
| 0.005   | 0.0003125    | 376    | 377    | 377    | 376.6667  | 1.19469027 |

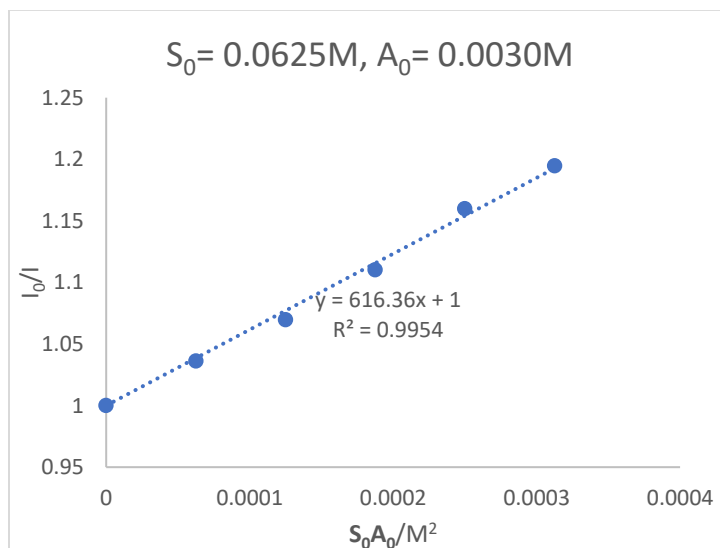

**Figure S5.10.2.** Stern-Volmer plot of luminescence data in **Table S5.10.2.**



$I_0$  was extrapolated from the five data points.

$$k_{obs}\tau_0 = 616$$

Substitute  $S_0=0.0625$ ,  $A_0=0.003$ ,  $K_A=92$  (from **entry 2**),  $k_{obs}\tau_0 = 616$  into the equation

$$S_0 + A_0 = \frac{S_0 A_0 k_{obs}\tau_0}{k_{PCET}\tau_0} + \frac{k_{PCET}\tau_0}{k_{obs}\tau_0} - \frac{1}{K_A}$$

$$0.0625 + 0.003 = \frac{0.0625 \times 0.003 \times 616}{k_{PCET}\tau_0} + \frac{k_{PCET}\tau_0}{616} - \frac{1}{92}$$

$$k_{PCET}\tau_0 = 45$$

Average the two values of  $k_{PCET}\tau_0 = (37+45)/2 = 41$

$$\Delta G^\circ_{\text{H-bond}} (\text{kcal/mol}) = -RT \ln K_A = -2.68 \text{ (same as in entry 2)}$$

$$\ln[k_{PCET}(\text{M}^{-1}\text{s}^{-1})] = \ln[k_{PCET}\tau_0/\tau_0] = 16.83$$

$$\tau_0 = 2.02\text{us}$$

error of  $\Delta G^\circ_{\text{H-bond}} (\text{kcal/mol}) = 0.04$  (same as in entry 2)

$$\text{error of } \ln[k_{PCET}(\text{M}^{-1}\text{s}^{-1})] = 0.08$$

### 5.11. Entry 11.

Non-PCET quenching of reductant by ketone alone (without acid) is given by the following equation:

$$I_0/I = 1 + k'_{sv}S_0$$

In all experiments, The solution was irradiated at 365nm, and fluorescence was measured at 491nm.

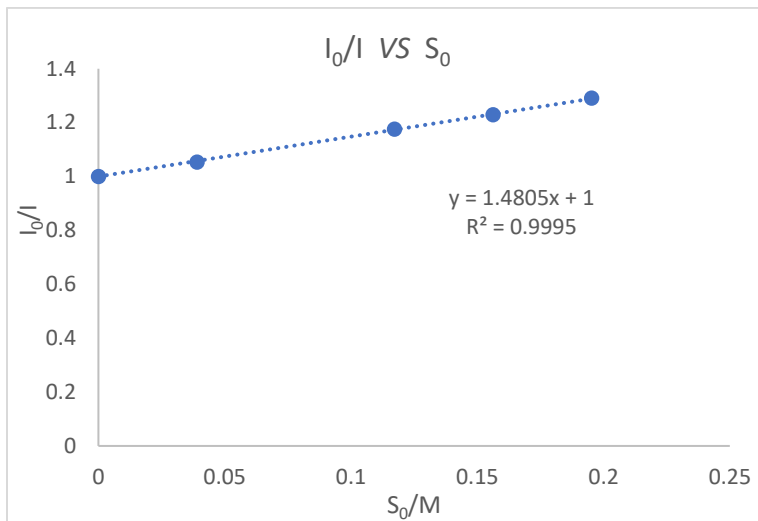

**Figure S5.11.** Stern-Volmer plot of luminescence data of non-PCET quenching by ketone alone

$$k'_{sv} = 1.48$$

Time-resolved luminescence suggests that the non-PCET quenching by ketone is static, while (PhO)<sub>2</sub>P(O)OH does not quench the luminescence intensity. Therefore, the following equation is used:

$$\frac{I_0/I}{1 + k'_{sv}S_0} = 1 + k_{obs}\tau_0S_0A_0$$

**Table S5.11.1.** Luminescence quenching data with  $S_0 = 0.0390M$ ,  $A_0 = 0.006M$ .  $S_0$  fixed at  $0.0390M$ .  $A_0$  varied from  $0.0040$  to  $0.0125M$

| $A_0/M$ | $S_0A_0/M^2$ | I/au 1 | I/au 2 | I/au 3 | I/au avg. | $I_0/(1+k_{SV}' S_0)$ |
|---------|--------------|--------|--------|--------|-----------|-----------------------|
| 0       | 0            |        |        |        |           | 1                     |
| 0.004   | 0.00025      | 324    | 323    | 323    | 323.3333  | 1.280412371           |
| 0.005   | 0.000313     | 304    | 304    | 304    | 304       | 1.361842105           |
| 0.0075  | 0.000469     | 265    | 264    | 262    | 263.6667  | 1.570164349           |
| 0.01    | 0.000625     | 237    | 234    | 235    | 235.3333  | 1.759206799           |
| 0.0125  | 0.000781     | 214    | 214    | 213    | 213.6667  | 1.937597504           |

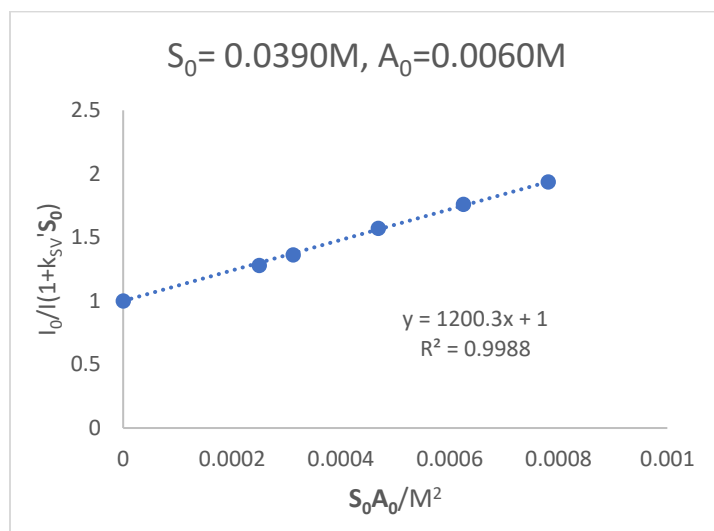

**Figure S5.11.1.** Stern-Volmer plot of luminescence data in **Table S5.11.1**.

$\frac{I_0}{1+k_{SV}' S_0}$  was extrapolated from the five data points.

$$k_{obs}\tau_0 = 1200$$

Substitute  $S_0 = 0.039$ ,  $A_0 = 0.006$ ,  $K_A = 13.4$  (from **entry 3**),  $k_{obs\ SV} = 1200$  into the equation

$$S_0 + A_0 = \frac{S_0 A_0 k_{obs}\tau_0}{k_{PCET}\tau_0} + \frac{k_{PCET}\tau_0}{k_{obs}\tau_0} - \frac{1}{K_A}$$

$$0.039 + 0.006 = \frac{0.039 \times 0.006 \times 1200}{k_{PCET}\tau_0} + \frac{k_{PCET}\tau_0}{1200} - \frac{1}{13.4}$$

$$k_{PCET}\tau_0 = 142$$

**Table S5.11.2. Luminescence quenching data with  $S_0 = 0.0156$ ,  $A_0 = 0.010$ .  $A_0$  fixed at 0.0100M.  $S_0$  varied from 0 to 0.0219M**

| $S_0/M$  | $S_0A_0/M^2$ | I/au 1 | I/au 2 | I/au 3 | I/au avg. | $I_0/I$  | $\frac{I_0/I}{1 + k_{SV}'S_0}$ |
|----------|--------------|--------|--------|--------|-----------|----------|--------------------------------|
| 0        | 0            | 517    | 516    | 515    | 516       | 1        | 1                              |
| 0.009375 | 9.38E-05     | 436    | 436    | 436    | 436       | 1.183486 | 1.166858505                    |
| 0.0125   | 0.000125     | 408    | 410    | 410    | 409.3333  | 1.260586 | 1.237081766                    |
| 0.015625 | 0.000156     | 390    | 387    | 387    | 388       | 1.329897 | 1.299044598                    |
| 0.01875  | 0.000188     | 368    | 369    | 369    | 368.6667  | 1.399638 | 1.360853997                    |
| 0.021875 | 0.000219     | 351    | 351    | 351    | 351       | 1.470085 | 1.422778098                    |

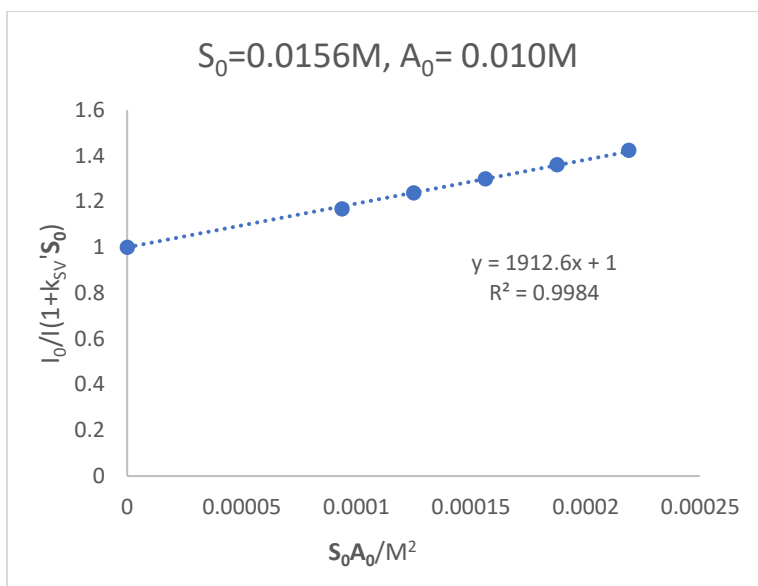

**Figure S5.11.2.** Stern-Volmer plot of luminescence data in **Table S5.11.2.**

$$k_{obs}\tau_0 = 1913$$

Substitute  $S_0 = 0.015625$ ,  $A_0 = 0.01$ ,  $K_A = 13.4$  (from **entry 3**),  $k_{obs}\tau_0 = 1913$  into the equation

$$S_0 + A_0 = \frac{S_0A_0 k_{obs}\tau_0}{k_{PCET}\tau_0} + \frac{k_{PCET}\tau_0}{k_{obs}\tau_0} - \frac{1}{K_A}$$

$$0.015625 + 0.01 = \frac{0.015625 \times 0.01 \times 1913}{k_{PCET}\tau_0} + \frac{k_{PCET}\tau_0}{1913} - \frac{1}{13.4}$$

$$k_{PCET}\tau_0 = 188$$

Average the two values of  $k_{PCET}\tau_0 = (142+188)/2 = 165$

$$\Delta G^\circ_{\text{H-bond}} \text{ (kcal/mol)} = -RT \ln K_A = -1.54 \text{ (same as in entry 3)}$$

$$\ln[k_{PCET}(\text{M}^{-1}\text{s}^{-1})] = \ln[k_{PCET}\tau_0/\tau_0] = 18.28$$

$$\tau_0 = 2.02 \mu\text{s}$$

$$\text{error of } \Delta G^\circ_{\text{H-bond}} \text{ (kcal/mol)} = 0.01 \text{ (same as in entry 3)}$$

$$\text{error of } \ln[k_{PCET}(\text{M}^{-1}\text{s}^{-1})] = 0.09$$

### 5.12. Entry 12.

Neither ketone nor acid quenches the luminescence of reductant **7** \*Ir (III). Therefore, the following equation is used:

$$I_0/I = 1 + k_{obs}\tau_0 S_0 A_0$$

In all experiments, the solution was irradiated at 370nm, and fluorescence was measured at 491nm.

**Table S5.12.1. Luminescence quenching data with  $S_0 = 0.0625M$ ,  $A_0 = 0.0060M$ .  $S_0$  fixed at  $0.0625M$ .  $A_0$  varied from  $0.003$  to  $0.0125M$**

| $A_0/M$ | $S_0 A_0/M^2$ | I/au 1 | I/au 2 | I/au 3 | I/au avg. | $I_0/I$  |
|---------|---------------|--------|--------|--------|-----------|----------|
| 0       | 0             |        |        |        |           | 1        |
| 0.003   | 0.000188      | 274    | 271    | 269    | 271.3333  | 1.253071 |
| 0.004   | 0.00025       | 249    | 248    | 247    | 248       | 1.370968 |
| 0.005   | 0.000313      | 234    | 234    | 232    | 233.3333  | 1.457143 |
| 0.0075  | 0.000469      | 200    | 199    | 198    | 199       | 1.708543 |
| 0.01    | 0.000625      | 180    | 178    | 179    | 179       | 1.899441 |
| 0.0125  | 0.000781      | 161    | 160    | 160    | 160.3333  | 2.120582 |

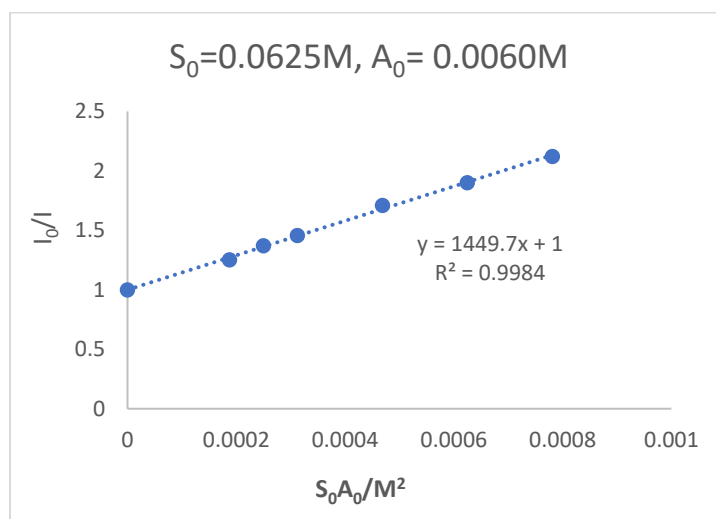

**Figure S5.12.1.** Stern-Volmer plot of luminescence data in **Table S5.12.1.**

$I_0$  was extrapolated from the six data points.

$$k_{obs}\tau_0 = 1450$$

Substitute  $S_0 = 0.0625$ ,  $A_0 = 0.006$ ,  $K_A = 2.06$  (from **entry 4**),  $k_{obs}\tau_0 = 1450$  into the equation

$$S_0 + A_0 = \frac{S_0 A_0 k_{obs}\tau_0}{k_{PCET}\tau_0} + \frac{k_{PCET}\tau_0}{k_{obs}\tau_0} - \frac{1}{K_A}$$

$$0.0625 + 0.006 = \frac{0.0625 \times 0.006 \times 1450}{k_{PCET}\tau_0} + \frac{k_{PCET}\tau_0}{1450} - \frac{1}{2.06}$$

$$k_{PCET}\tau_0 = 803$$

**Table S5.12.1.** Luminescence quenching data with  $S_0 = 0.025\text{M}$ ,  $A_0 = 0.0060\text{M}$ .  $S_0$  fixed at  $0.025\text{M}$ .  $A_0$  varied from  $0.004$  to  $0.010\text{M}$

| $A_0/\text{M}$ | $S_0 A_0/\text{M}^2$ | $I/\text{au 1}$ | $I/\text{au 2}$ | $I/\text{au 3}$ | $I/\text{au avg.}$ | $I_0/I$  |
|----------------|----------------------|-----------------|-----------------|-----------------|--------------------|----------|
| 0              | 0                    |                 |                 |                 |                    | 1        |
| 0.004          | 0.0001               | 853             | 853             | 855             | 853.6667           | 1.156189 |
| 0.005          | 0.000125             | 815             | 812             | 802             | 809.6667           | 1.21902  |
| 0.006          | 0.00015              | 784             | 789             | 785             | 786                | 1.255725 |
| 0.008          | 0.0002               | 731             | 734             | 730             | 731.6667           | 1.348975 |
| 0.01           | 0.00025              | 685             | 686             | 691             | 687.3333           | 1.435984 |

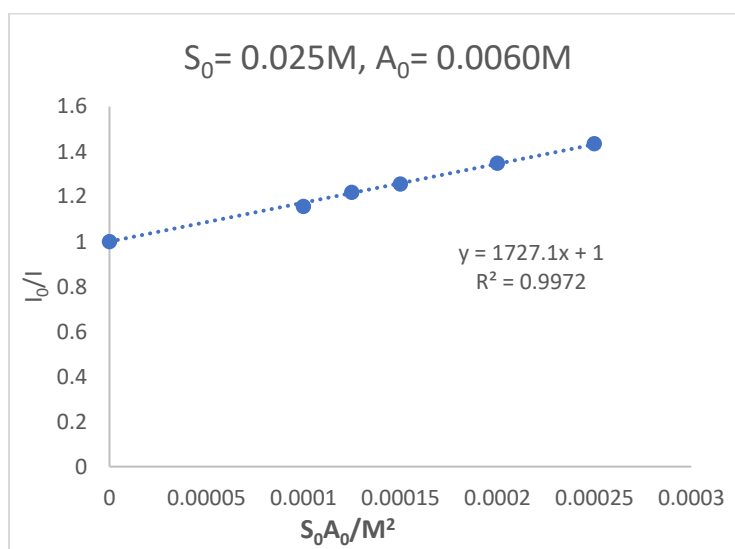

**Figure S5.12.2.** Stern-Volmer plot of luminescence data in **Table S5.12.2.**

$I_0$  was extrapolated from the five data points.

$$k_{obs}\tau_0 = 1727$$

Substitute  $S_0 = 0.025$ ,  $A_0 = 0.006$ ,  $K_A = 2.06$  (from **entry 4**),  $k_{obs}\tau_0 = 1727$  into the equation

$$S_0 + A_0 = \frac{S_0 A_0 k_{obs}\tau_0}{k_{PCET}\tau_0} + \frac{k_{PCET}\tau_0}{k_{obs}\tau_0} - \frac{1}{K_A}$$

$$0.025 + 0.006 = \frac{0.025 \times 0.006 \times 1727}{k_{PCET\,SV}} + \frac{k_{PCET\,SV}}{1727} - \frac{1}{2.06}$$

$$k_{PCET}\tau_0 = 793$$

Average the two values of  $k_{PCET}\tau_0 = (803+793)/2 = 798$

$$\Delta G^\circ_{\text{H-bond}} \text{ (kcal/mol)} = -RT \ln K_A = -0.43 \text{ (same as in entry 4)}$$

$$\ln[k_{PCET}(\text{M}^{-1}\text{s}^{-1})] = \ln[k_{PCET}\tau_0/\tau_0] = 19.79$$

$$\tau_0 = 2.02\text{us}$$

$$\text{error of } \Delta G^\circ_{\text{H-bond}} \text{ (kcal/mol)} = 0.03 \text{ (same as in entry 4)}$$

$$\text{error of } \ln[k_{PCET}(\text{M}^{-1}\text{s}^{-1})] = 0.03 \text{ (same as in entry 4)}$$



### 5.13. Entry 13.

Neither ketone nor acid quenches the luminescence of reductant **7** \*Ir (III). Therefore, the following equation is used:

$$I_0/I = 1 + k_{obs}\tau_0 S_0 A_0$$

In all experiments, the solution was irradiated at 370nm, and fluorescence was measured at 491nm.

**Table S5.13.1. Luminescence quenching data with  $S_0=0.050M$ ,  $A_0=0.0040M$ .  $S_0$  fixed at  $0.050M$ .  $A_0$  varied from  $0.002$  to  $0.006M$**

| $A_0/M$ | $S_0A_0/M^2$ | I/au 1 | I/au 2 | I/au 3 | I/au avg. | $I_0/I$  |
|---------|--------------|--------|--------|--------|-----------|----------|
| 0       | 0            |        |        |        |           | 1        |
| 0.002   | 0.0001       | 590    | 590    | 590    | 590       | 1.211864 |
| 0.003   | 0.00015      | 545    | 542    | 540    | 542.3333  | 1.318377 |
| 0.004   | 0.0002       | 501    | 499    | 500    | 500       | 1.43     |
| 0.005   | 0.00025      | 464    | 464    | 467    | 465       | 1.537634 |
| 0.006   | 0.0003       | 432    | 431    | 431    | 431.3333  | 1.657651 |

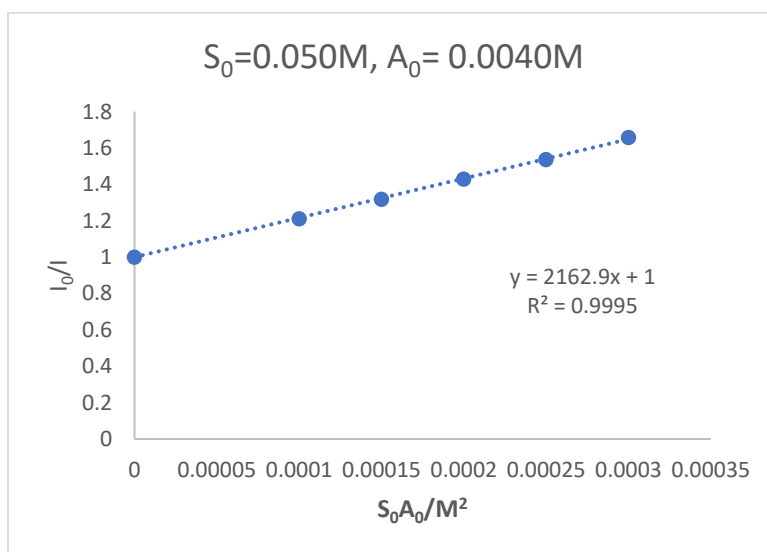

**Figure S5.13.1.** Stern-Volmer plot of luminescence data in **Table S5.13.1.**

$I_0$  was extrapolated from the five data points.

$$k_{obs}\tau_0 = 2163$$

Substitute  $S_0 = 0.05$ ,  $A_0 = 0.00$ ,  $K_A = 6.2$  (from **entry 5**),  $k_{obs\ SV} = 2163$  into the equation

$$S_0 + A_0 = \frac{S_0 A_0 k_{obs} \tau_0}{k_{PCET} \tau_0} + \frac{k_{PCET} \tau_0}{k_{obs} \tau_0} - \frac{1}{K_A}$$

$$0.05 + 0.004 = \frac{0.05 \times 0.004 \times 2163}{k_{PCET} \tau_0} + \frac{k_{PCET} \tau_0}{2163} - \frac{1}{6.2}$$

$$k_{PCET} \tau_0 = 463$$

**Table S5.13.2.** Luminescence quenching data with  $S_0 = 0.100M$ ,  $A_0 = 0.0040M$ .  $S_0$  fixed at  $0.100M$ .  $A_0$  is varied from  $0.002$  to  $0.006M$

| $A_0/M$  | $S_0 A_0/ M^2$ | I/au 1 | I/au 2 | I/au 3 | I/au avg. | $I_0/I$  |
|----------|----------------|--------|--------|--------|-----------|----------|
| 0        | 0              |        |        |        |           | 1        |
| 0.002    | 0.0002         | 500    | 500    | 501    | 500.3333  | 1.295137 |
| 0.003    | 0.0003         | 438    | 438    | 439    | 438.3333  | 1.478327 |
| 0.004    | 0.0004         | 394    | 394    | 392    | 393.3333  | 1.647458 |
| 0.005    | 0.0005         | 359    | 358    | 358    | 358.3333  | 1.808372 |
| 0.005825 | 0.000583       | 333    | 333    | 332    | 332.6667  | 1.947896 |

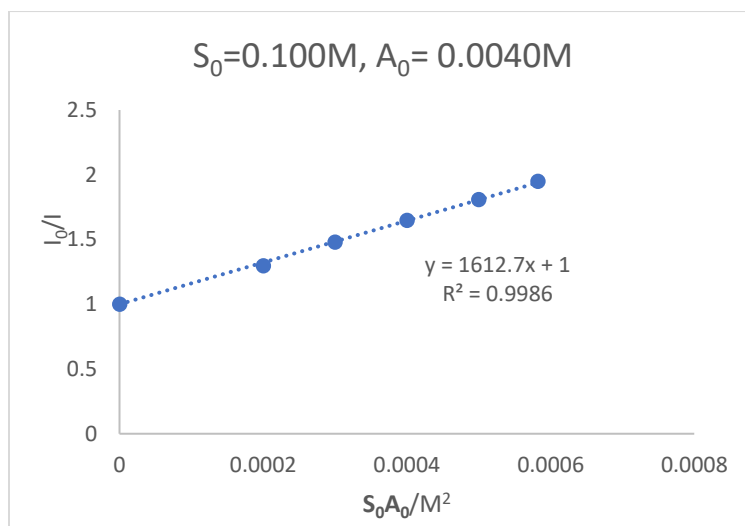

**Figure S5.13.2.** Stern-Volmer plot of luminescence data in **Table S5.13.2.**

$I_0$  was extrapolated from the five data points.

$$k_{obs} \tau_0 = 1613$$

Substitute  $S_0 = 0.100$ ,  $A_0 = 0.00$ ,  $K_A = 6.2$  (from **entry 5**),  $k_{obs}\tau_0 = 1613$  into the equation

$$S_0 + A_0 = \frac{S_0 A_0 k_{obs}\tau_0}{k_{PCET}\tau_0} + \frac{k_{PCET}\tau_0}{k_{obs}\tau_0} - \frac{1}{K_A}$$

$$0.10 + 0.004 = \frac{0.10 \times 0.004 \times 1613}{k_{PCET}\tau_0} + \frac{k_{PCET}\tau_0}{1613} - \frac{1}{6.2}$$

$$k_{PCET}\tau_0 = 425$$

Average the two values of  $k_{PCET}\tau_0 = (463+425)/2 = 444$

$$\Delta G^\circ_{\text{H-bond}} (\text{kcal/mol}) = -RT \ln K_A = -1.08 \text{ (same as in entry 5)}$$

$$\ln[k_{PCET}(\text{M}^{-1}\text{s}^{-1})] = \ln[k_{PCET}\tau_0/\tau_0] = 19.209$$

$$\tau_0 = 2.02 \mu\text{s}$$

$$\text{error of } \Delta G^\circ_{\text{H-bond}} (\text{kcal/mol}) = 0.02 \text{ (same as in entry 5)}$$

$$\text{error of } \ln[k_{PCET}(\text{M}^{-1}\text{s}^{-1})] = 0.04$$

### 5.14. Entry 14.

Neither ketone nor acid quenches the luminescence of reductant **8** \*Ir (III). Therefore, the following equation is used:

$$I_0/I = 1 + k_{obs}\tau_0 S_0 A_0$$

In all experiments, the solution was irradiated at 365nm, and fluorescence was measured at 491nm.

**Table S5.14.1.**  $S_0$  fixed at 0.100 M,  $A_0$  varied from 0.002 to 0.005M

| $A_0/M$  | $S_0 A_0/M^2$ | I/au 1 | I/au 2 | I/au 3 | I/au avg. | $I_0/I$  |
|----------|---------------|--------|--------|--------|-----------|----------|
|          | 0             |        |        |        |           | 1        |
| 0.002132 | 0.000213247   | 566    | 570    | 568    | 568       | 1.223592 |
| 0.002666 | 0.000266559   | 545    | 544    | 545    | 544.6667  | 1.27601  |
| 0.003732 | 0.000373182   | 505    | 502    | 502    | 503       | 1.38171  |
| 0.004265 | 0.000426494   | 481    | 478    | 483    | 480.6667  | 1.445908 |
| 0.004798 | 0.000479806   | 459    | 459    | 459    | 459       | 1.514161 |

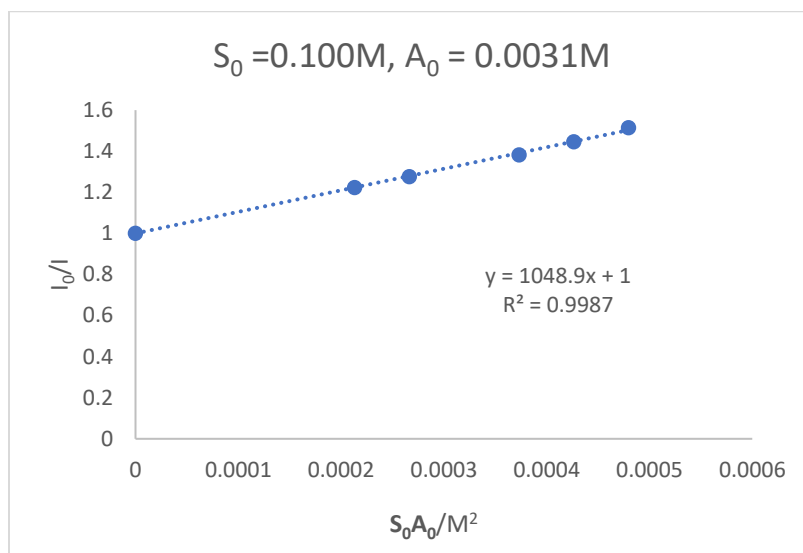

**Figure S5.14.1.** Stern-Volmer plot of luminescence data in Table S5.14.1.

$I_0$  was extrapolated from the five data points.

$$k_{obs}\tau_0 = 1049$$

**Table S5.14.2.  $S_0$  fixed at 0.040M.  $A_0$  varied from 0.004 to 0.011M**

| $A_0/M$  | $S_0A_0/M^2$ | I/au 1 | I/au 2 | I/au 3 | I/au avg. | $I_0/I$  |
|----------|--------------|--------|--------|--------|-----------|----------|
| 0        | 0            |        |        |        |           | 1        |
| 0.004372 | 0.000174863  | 916    | 917    | 917    | 916.6667  | 1.293818 |
| 0.005464 | 0.000218578  | 863    | 865    | 862    | 863.3333  | 1.373745 |
| 0.006557 | 0.000262294  | 828    | 830    | 829    | 829       | 1.430639 |
| 0.00765  | 0.000306009  | 798    | 783    | 790    | 790.3333  | 1.500633 |
| 0.009836 | 0.000393441  | 722    | 726    | 722    | 723.3333  | 1.639631 |
| 0.010929 | 0.000437156  | 698    | 698    | 697    | 697.6667  | 1.699952 |

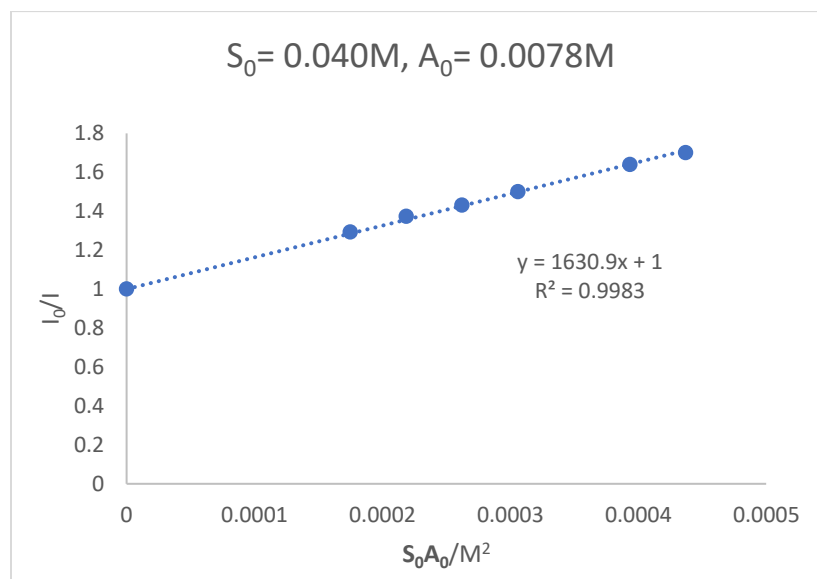

**Figure S5.14.2.** Stern-Volmer plot of luminescence data in **Table S5.14.2.**

$I_0$  was extrapolated from the six data points.

$$k_{obs}\tau_0 = 1631$$

**Table S5.14.3.  $S_0$  is fixed at 0.0625M.  $A_0$  is varied from 0.002 to 0.014M**

| $A_0/M$  | $S_0A_0/M^2$ | I/au 1 | I/au 2 | I/au 3 | I/au avg. | $I_0/I$  |
|----------|--------------|--------|--------|--------|-----------|----------|
| 0        | 0            |        |        |        |           | 1        |
| 0.002798 | 0.000174863  | 745    | 745    | 739    | 743       | 1.238223 |
| 0.004197 | 0.000262294  | 686    | 674    | 671    | 677       | 1.358936 |
| 0.005596 | 0.000349725  | 622    | 616    | 620    | 619.3333  | 1.485468 |
| 0.008393 | 0.000524588  | 530    | 534    | 534    | 532.6667  | 1.727159 |
| 0.011191 | 0.00069945   | 470    | 470    | 473    | 471       | 1.953291 |
| 0.013989 | 0.000874313  | 416    | 416    | 422    | 418       | 2.200957 |

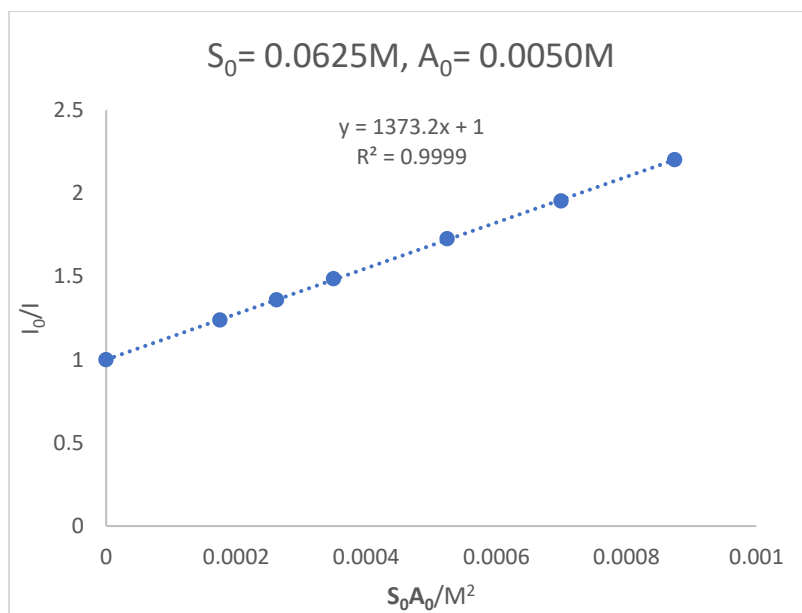

**Figure S5.14.3.** Stern-Volmer plot of luminescence data in **Table S5.14.3.**

$I_0$  was extrapolated from the six data points.

$$k_{obs}\tau_0 = 1373$$

Table S5.14.4.  $S_0$  fixed at 0.156M.  $A_0$  varied from 0.002 to 0.009M

| $A_0/M$  | $S_0A_0/M^2$ | I/au 1 | I/au 2 | I/au 3 | I/au avg. | $I_0/I$  |
|----------|--------------|--------|--------|--------|-----------|----------|
| 0        | 0            |        |        |        |           | 1        |
| 0.001791 | 0.00027978   | 431    | 429    | 422    | 427.3333  | 1.214509 |
| 0.002686 | 0.00041967   | 397    | 387    | 390    | 391.3333  | 1.326235 |
| 0.003581 | 0.00055956   | 351    | 351    | 353    | 351.6667  | 1.475829 |
| 0.007162 | 0.00111912   | 276    | 276    | 277    | 276.3333  | 1.878166 |
| 0.008953 | 0.0013989    | 248    | 248    | 244    | 246.6667  | 2.104054 |

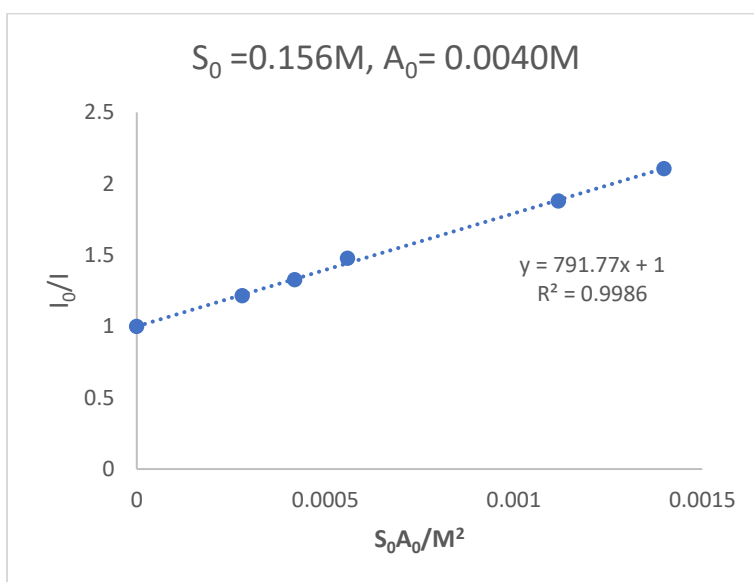

Figure S5.14.4. Stern-Volmer plot of luminescence data in Table S5.14.4.

$I_0$  was extrapolated from the five data points.

$$k_{obs}\tau_0 = 792$$

$$S_0 + A_0 = \frac{S_0 A_0 k_{obs} \tau_0}{k_{PCET} \tau_0} + \frac{k_{PCET} \tau_0}{k_{obs} \tau_0} - \frac{1}{K_A} \quad (8)$$

**Table 5.14.5. Solutions to Key Equation 8 and Entry 14 in Table S5.**

|   | $S_0$ (M) | $A_0$ (M) | $S_0 A_0$ (M <sup>2</sup> ) | $S_0 + A_0$ (M) | $k_{obs} \tau_0$ |
|---|-----------|-----------|-----------------------------|-----------------|------------------|
| 1 | 0.100     | 0.0031    | 0.00031                     | 0.103           | 1050             |
| 2 | 0.040     | 0.0078    | 0.00031                     | 0.0478          | 1630             |
| 3 | 0.0625    | 0.0050    | 0.00031                     | 0.0675          | 1370             |
| 4 | 0.156     | 0.0040    | 0.00062                     | 0.160           | 790              |

  

|                | $K_A/M^{-1}$ | $k_{PCET} \tau_0/M^{-1}$ |
|----------------|--------------|--------------------------|
| <b>1&amp;2</b> | 17.5         | 166.0                    |
| <b>1&amp;3</b> | 18.9         | 161.5                    |
| <b>1&amp;4</b> | 14.0         | 181.0                    |
| <b>2&amp;3</b> | 16.2         | 174.0                    |
| <b>2&amp;4</b> | 16.3         | 173.0                    |
| <b>3&amp;4</b> | 16.1         | 175.0                    |
| <b>average</b> | 16.5         | 172                      |

$$\Delta G^\circ_{H-bond} \text{ (kcal/mol)} = -RT \ln K_A = -1.66$$

$$\ln[k_{PCET} (M^{-1} s^{-1})] = \ln[k_{PCET} \tau_0 / \tau_0] = 18.47$$

$$\tau_0 = 1.61 \mu s$$

$$\text{error of } \Delta G^\circ_{H-bond} \text{ (kcal/mol)} = 0.05$$

$$\text{error of } \ln[k_{PCET} (M^{-1} s^{-1})] = 0.04$$



### 5.15. Entry 15.

Neither ketone nor acid quenches the luminescence of reductant **8** \*Ir (III). Therefore, the following equation is used:

$$I_0/I = 1 + k_{obs}\tau_0 S_0 A_0$$

In all experiments, the solution was irradiated at 365nm, and fluorescence was measured at 491nm.

**Table S5.15.1.  $S_0$  fixed at 0.100M.  $A_0$  varied from 0.0015 to 0.003M**

| $A_0/M$  | $S_0 A_0/M^2$ | I/au 1 | I/au 2 | I/au 3 | I/au avg. | $I_0/I$  |
|----------|---------------|--------|--------|--------|-----------|----------|
| 0        | 0             |        |        |        |           | 1        |
| 0.001563 | 0.000156      | 690    | 689    | 690    | 689.6667  | 1.20783  |
| 0.001875 | 0.000188      | 666    | 668    | 668    | 667.3333  | 1.248252 |
| 0.002188 | 0.000219      | 648    | 645    | 650    | 647.6667  | 1.286155 |
| 0.002813 | 0.000281      | 614    | 614    | 614    | 614       | 1.356678 |
| 0.003125 | 0.000313      | 593    | 593    | 600    | 595.3333  | 1.399216 |

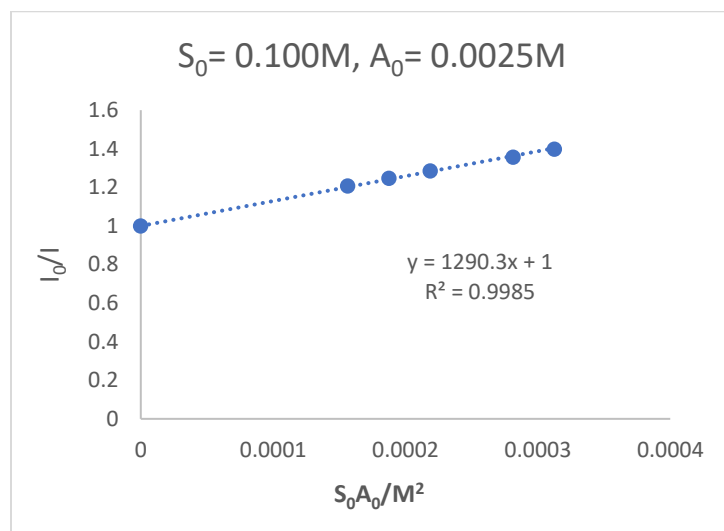

**Figure S5.15.1.** Stern-Volmer plot of luminescence data in **Table S5.15.1.**

$I_0$  was extrapolated from the five data points.

$$k_{obs}\tau_0 = 1290$$

**Table S5.15.2.  $S_0$  fixed at 0.0312M.  $A_0$  varied from 0.005 to 0.009M**

| $A_0/M$ | $S_0A_0/M^2$ | I/au 1 | I/au 2 | I/au 3 | I/au avg. | $I_0/I$  |
|---------|--------------|--------|--------|--------|-----------|----------|
| 0       | 0            |        |        |        |           | 1        |
| 0.005   | 0.000156     | 989    | 964    | 952    | 968.3333  | 1.331153 |
| 0.006   | 0.000188     | 935    | 913    | 912    | 920       | 1.401087 |
| 0.007   | 0.000219     | 884    | 884    | 875    | 881       | 1.46311  |
| 0.008   | 0.00025      | 837    | 837    | 838    | 837.3333  | 1.539411 |
| 0.009   | 0.000281     | 808    | 805    | 803    | 805.3333  | 1.600579 |

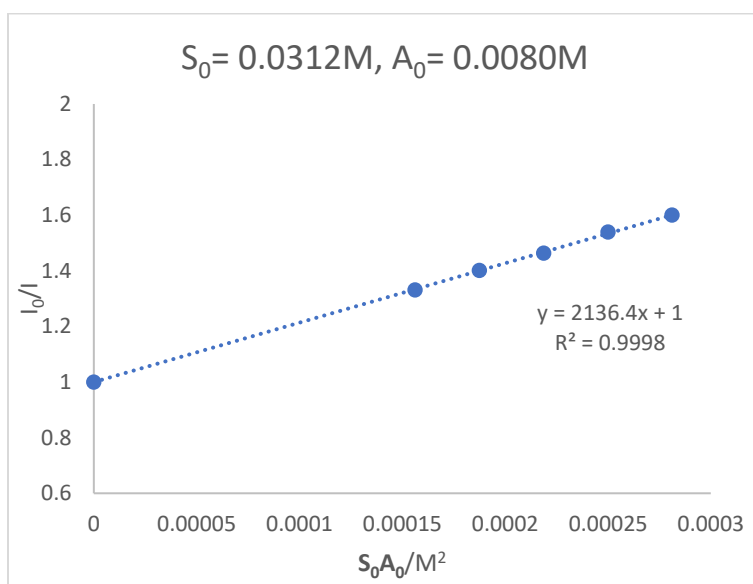

**Figure S5.15.2.** Stern-Volmer plot of luminescence data in **Table S5.15.2.**

$I_0$  was extrapolated from the five data points.

$$k_{obs}\tau_0 = 2136$$

**Table S5.15.3.  $S_0$  fixed at 0.0625M.  $A_0$  varied from 0.003 to 0.005M**

| $A_0/M$ | $S_0A_0/M^2$ | I/au 1 | I/au 2 | I/au 3 | I/au avg. | $I_0/I$  |
|---------|--------------|--------|--------|--------|-----------|----------|
| 0       | 0            |        |        |        |           | 1        |
| 0.003   | 0.000188     | 792    | 777    | 780    | 783       | 1.319285 |
| 0.0035  | 0.000219     | 750    | 751    | 748    | 749.6667  | 1.377946 |
| 0.004   | 0.00025      | 722    | 727    | 726    | 725       | 1.424828 |
| 0.0045  | 0.000281     | 697    | 700    | 700    | 699       | 1.477825 |
| 0.005   | 0.000313     | 680    | 682    | 680    | 680.6667  | 1.51763  |

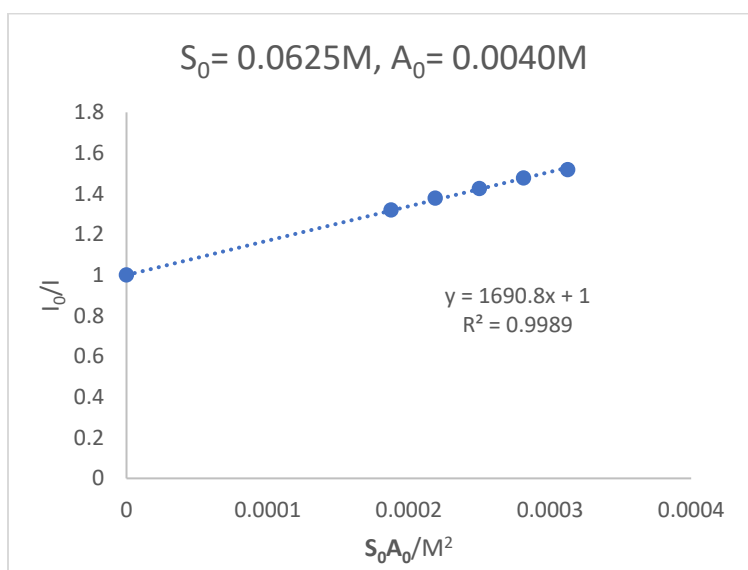

**Figure S5.15.3.** Stern-Volmer plot of luminescence data in **Table S5.15.3.**

$I_0$  was extrapolated from the five data points.

$$k_{obs}\tau_0 = 1691$$

**Table S5.15.4.**  $S_0$  is fixed at 0.156M.  $A_0$  is varied from 0.001 to 0.002M

| $A_0/M$ | $S_0A_0/M^2$ | I/au 1 | I/au 2 | I/au 3 | I/au avg. | $I_0/I$  |
|---------|--------------|--------|--------|--------|-----------|----------|
| 0       | 0            |        |        |        |           | 1        |
| 0.001   | 0.000156     | 573    | 573    | 573    | 573       | 1.144852 |
| 0.0012  | 0.000188     | 554    | 553    | 558    | 555       | 1.181982 |
| 0.0014  | 0.000219     | 543    | 541    | 541    | 541.6667  | 1.211077 |
| 0.0018  | 0.000281     | 516    | 516    | 516    | 516       | 1.271318 |
| 0.002   | 0.000313     | 502    | 502    | 504    | 502.6667  | 1.30504  |

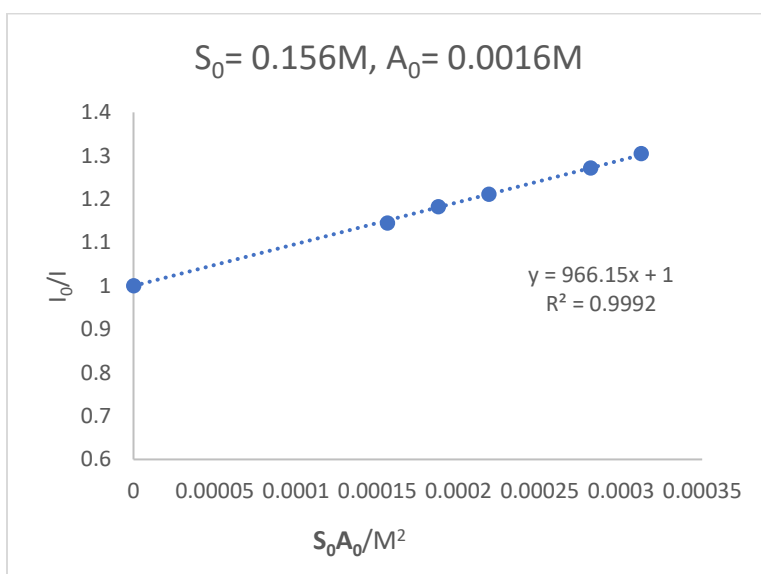

**Figure S5.15.4.** Stern-Volmer plot of luminescence data in Table S5.15.4.

$I_0$  was extrapolated from the five data points.

$$k_{obs}\tau_0 = 966$$

$$S_0 + A_0 = \frac{S_0 A_0 k_{obs} \tau_0}{k_{PCET} \tau_0} + \frac{k_{PCET} \tau_0}{k_{obs} \tau_0} - \frac{1}{K_A} \quad (8)$$

**Table 5.15.5. Solutions to Key Equation 8 and Entry 15 in Table S5.**

|   | $S_0$ (M) | $A_0$ (M) | $S_0 A_0$ (M <sup>2</sup> ) | $S_0 + A_0$ (M) | $k_{obs} \tau_0$ |
|---|-----------|-----------|-----------------------------|-----------------|------------------|
| 1 | 0.100     | 0.0025    | 0.00025                     | 0.103           | 1290             |
| 2 | 0.0312    | 0.0080    | 0.00025                     | 0.0393          | 2140             |
| 3 | 0.0625    | 0.0040    | 0.00025                     | 0.0665          | 1690             |
| 4 | 0.156     | 0.0016    | 0.00025                     | 0.158           | 970              |

|                | $K_A/M^{-1}$ | $k_{PCET} \tau_0/M^{-1}$ |
|----------------|--------------|--------------------------|
| <b>1&amp;2</b> | 16.0         | 211.7                    |
| <b>1&amp;3</b> | 18.0         | 202.8                    |
| <b>1&amp;4</b> | 16.1         | 211.5                    |
| <b>2&amp;3</b> | 14.7         | 224.6                    |
| <b>2&amp;4</b> | 16.0         | 211.6                    |
| <b>3&amp;4</b> | 17.1         | 207.9                    |
| <b>average</b> | 16.3         | 212                      |

$$\Delta G^\circ_{H\text{-bond}} \text{ (kcal/mol)} = -RT \ln K_A = -1.65$$

$$\ln[k_{PCET} (M^{-1}S^{-1})] = \ln[k_{PCET} \tau_0 / \tau_0] = 18.68$$

$$\tau_0 = 1.61 \mu\text{s}$$

$$\text{error of } \Delta G^\circ_{H\text{-bond}} \text{ (kcal/mol)} = 0.04$$

$$\text{error of } \ln[k_{PCET} (M^{-1}S^{-1})] = 0.05$$

### 5.16. Entry 16.

Ketone does not quench the luminescence of reductant **7** \*Ir (III). Non-PCET quenching of reductant by acid alone (without ketone) is given by the following equation:

$$\frac{I_0}{I} = 1 + k''_{dSV} A_0$$

In all experiments, the solution was irradiated at wavelength (365nm) that gives highest emission intensity at 491nm.

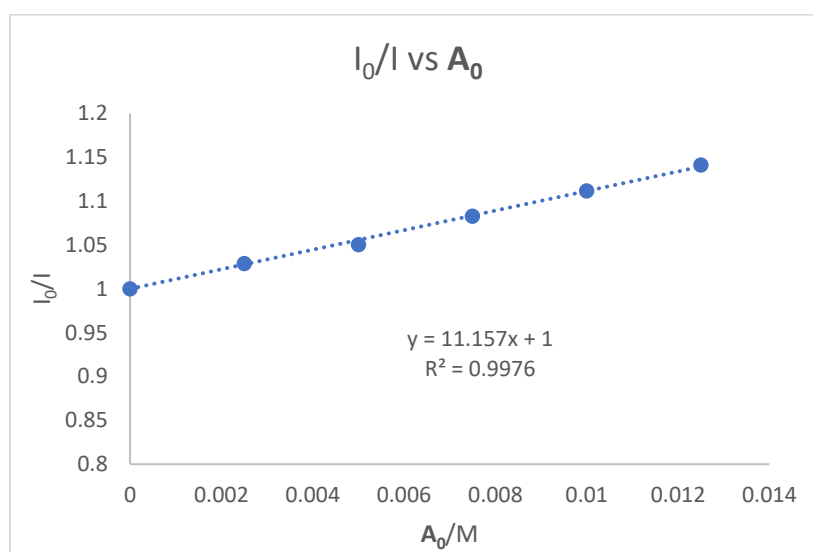

Figure S5.16. Stern-Volmer plot of luminescence data of non-PCET quenching by acid alone

$$k''_{dSV} = 11.2$$

Time-resolved luminescence suggests that the non-PCET quenching by acid is dynamic, therefore, the following equation is used:

$$\frac{I_0}{I} = 1 + (k''_{SV} + k_{obs}\tau_0 S_0)A_0$$

**Table S5.16.1.**  $S_0$  fixed at 0.040M.  $A_0$  varied from 0.000625 to 0.00313M

| $A_0/M$  | $S_0A_0/M^2$ | $I/au\ 1$ | $I/au\ 2$ | $I/au\ 3$ | $I/au\ avg.$ | $I_0/I$  |
|----------|--------------|-----------|-----------|-----------|--------------|----------|
| 0        | 0            |           |           |           |              | 1        |
| 0.000625 | 0.000025     | 362       | 363       | 363       | 362.6667     | 1.227022 |
| 0.00125  | 0.00005      | 304       | 301       | 303       | 302.6667     | 1.470264 |
| 0.001875 | 0.000075     | 263       | 264       | 262       | 263          | 1.692015 |
| 0.0025   | 0.0001       | 236       | 235       | 235       | 235.3333     | 1.890935 |
| 0.003125 | 0.000125     | 210       | 209       | 209       | 209.3333     | 2.125796 |

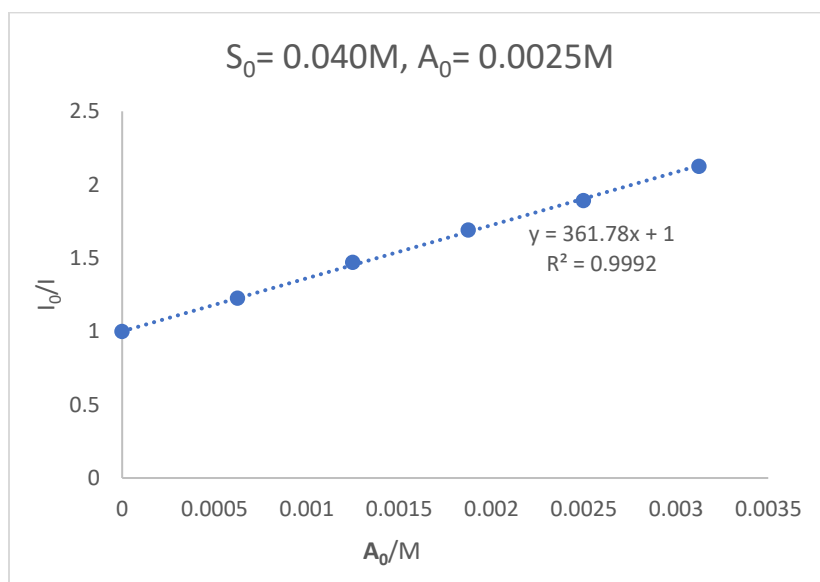

**Figure S5.16.1.** Stern-Volmer plot of luminescence data in **Table S5.16.1.**

$I_0$  was extrapolated from the five data points.

$$k''_{SV} + k_{obs}\tau_0 S_0 = 361.78$$

$$11.2 + k_{obs}\tau_0 \times 0.04 = 361.78, k_{obs}\tau_0 = 8765$$

**Table S5.16.2.  $S_0$  fixed at 0.0625M.  $A_0$  varied from 0.0008 to 0.0024M**

| $A_0/M$ | $S_0A_0/M^2$ | I/au 1 | I/au 2 | I/au 3 | I/au avg. | $I_0/I$  |
|---------|--------------|--------|--------|--------|-----------|----------|
| 0       | 0            |        |        |        |           | 1        |
| 0.0008  | 0.00005      | 290    | 292    | 295    | 292.3333  | 1.323831 |
| 0.0012  | 0.000075     | 257    | 257    | 257    | 257       | 1.505837 |
| 0.0016  | 0.0001       | 226    | 226    | 225    | 225.6667  | 1.714919 |
| 0.002   | 0.000125     | 203    | 204    | 203    | 203.3333  | 1.903279 |
| 0.0024  | 0.00015      | 184    | 186    | 185    | 185       | 2.091892 |

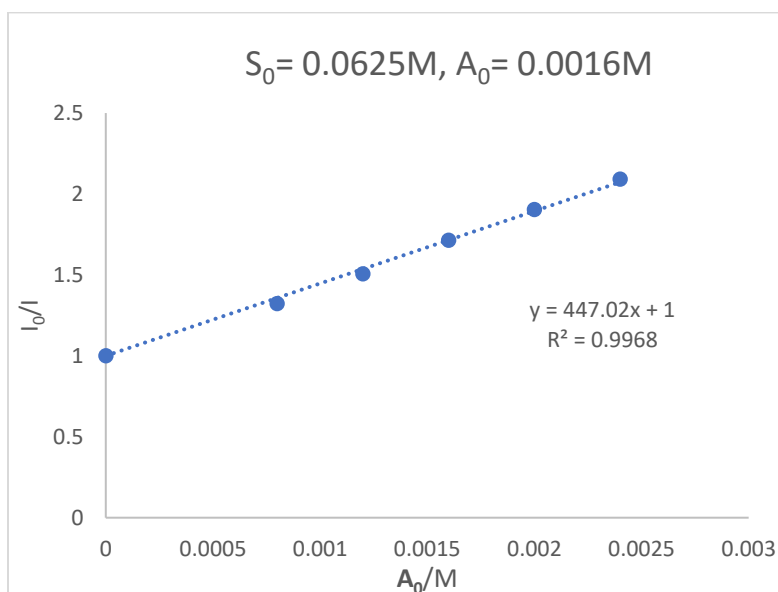

**Figure S5.16.2.** Stern-Volmer plot of luminescence data in **Table S5.16.2.**

$I_0$  was extrapolated from the five data points.

$$k''_{SV} + k_{obs}\tau_0 S_0 = 447.02$$

$$11.2 + k_{obs}\tau_0 \times 0.0625 = 447.02, k_{obs}\tau_0 = 6973$$



**Table S5.16.3.  $S_0$  fixed at 0.050M.  $A_0$  varied from 0.001 to 0.003M**

| $A_0/M$ | $S_0A_0/M^2$ | I/au 1 | I/au 2 | I/au 3 | I/au avg. | $I_0/I$  |
|---------|--------------|--------|--------|--------|-----------|----------|
| 0       | 0            |        |        |        |           | 1        |
| 0.001   | 0.00005      | 289    | 284    | 287    | 286.6667  | 1.39186  |
| 0.0015  | 0.000075     | 247    | 248    | 248    | 247.6667  | 1.611036 |
| 0.002   | 0.0001       | 223    | 223    | 222    | 222.6667  | 1.791916 |
| 0.0025  | 0.000125     | 198    | 198    | 199    | 198.3333  | 2.011765 |
| 0.003   | 0.00015      | 181    | 181    | 180    | 180.6667  | 2.208487 |

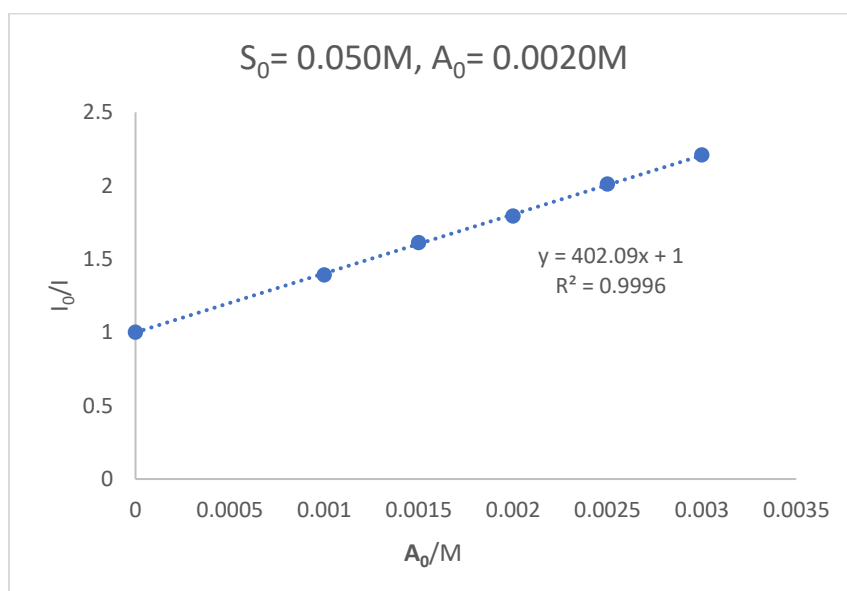

**Figure S5.16.3.** Stern-Volmer plot of luminescence data in **Table S5.16.3.**

$I_0$  was extrapolated from the five data points.

$$k''_{SV} + k_{obs}\tau_0 S_0 = 402.09$$

$$11.2 + k_{obs}\tau_0 \times 0.05 = 402.09, k_{obs}\tau_0 = 7820$$

**Table S5.16.4.  $S_0$  fixed at 0.025M.  $A_0$  varied from 0.001 to 0.006M**

| $A_0/M$ | $S_0A_0/M^2$ | $I/au$ 1 | $I/au$ 2 | $I/au$ 3 | $I/au$ avg. | $I_0/I$  |
|---------|--------------|----------|----------|----------|-------------|----------|
| 0       | 0            |          |          |          |             | 1        |
| 0.001   | 0.000025     | 364      | 362      | 364      | 363.3333    | 1.312844 |
| 0.002   | 0.00005      | 301      | 301      | 299      | 300.3333    | 1.588235 |
| 0.003   | 0.000075     | 268      | 263      | 265      | 265.3333    | 1.797739 |
| 0.004   | 0.0001       | 230      | 231      | 232      | 231         | 2.064935 |
| 0.006   | 0.00015      | 186      | 186      | 185      | 185.6667    | 2.56912  |

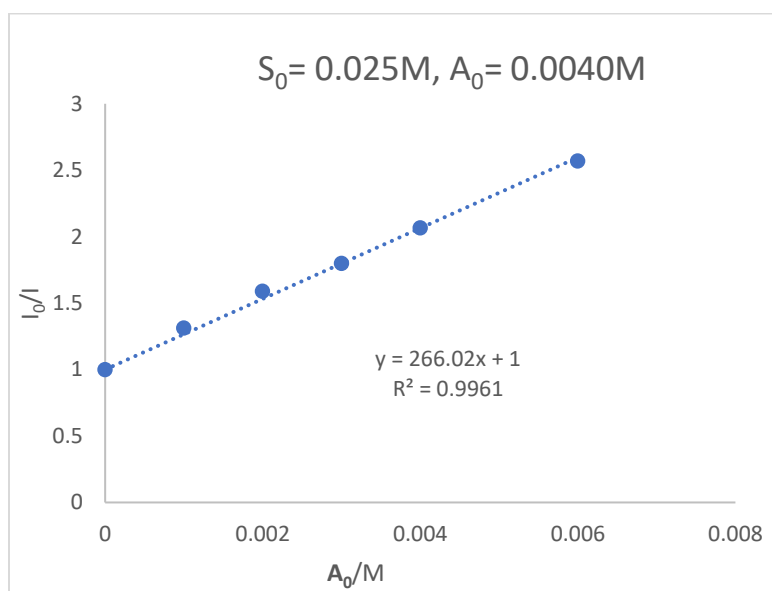

**Figure S5.16.4.** Stern-Volmer plot of luminescence data in **Table S5.16.4.**

$I_0$  was extrapolated from the five data points.

$$k''_{SV} + k_{obs}\tau_0 S_0 = 266.02$$

$$11.2 + k_{obs}\tau_0 \times 0.025 = 266.02, k_{obs}\tau_0 = 10193$$

$$S_0 + A_0 = \frac{S_0 A_0 k_{obs} \tau_0}{k_{PCET} \tau_0} + \frac{k_{PCET} \tau_0}{k_{obs} \tau_0} - \frac{1}{K_A} \quad (8)$$

**Table 5.16.5. Solutions to Key Equation 8 and Entry 16 in Table S5.**

|   | $S_0$ (M) | $A_0$ (M) | $S_0 A_0$ (M <sup>2</sup> ) | $S_0 + A_0$ (M) | $k_{obs} \tau_0$ |
|---|-----------|-----------|-----------------------------|-----------------|------------------|
| 1 | 0.040     | 0.0025    | 0.0001                      | 0.0425          | 8770             |
| 2 | 0.0625    | 0.0016    | 0.0001                      | 0.0641          | 6970             |
| 3 | 0.050     | 0.0020    | 0.0001                      | 0.052           | 7820             |
| 4 | 0.025     | 0.0040    | 0.0001                      | 0.029           | 10200            |

|                | $K_A/M^{-1}$ | $k_{PCET} \tau_0/M^{-1}$ |
|----------------|--------------|--------------------------|
| <b>1&amp;2</b> | 22.9         | 745.0                    |
| <b>1&amp;3</b> | 26.0         | 699.0                    |
| <b>1&amp;4</b> | 18.0         | 855.0                    |
| <b>2&amp;3</b> | 20.2         | 786.0                    |
| <b>2&amp;4</b> | 20.3         | 784.0                    |
| <b>3&amp;4</b> | 20.4         | 783.0                    |
| <b>average</b> | 21.3         | 775                      |

$$\Delta G^\circ_{H-bond} \text{ (kcal/mol)} = -RT \ln K_A = -1.81$$

$$\ln[k_{PCET} (M^{-1} s^{-1})] = \ln[k_{PCET} \tau_0 / \tau_0] = 19.77$$

$$\tau_0 = 2.02 \mu s$$

$$\text{error of } \Delta G^\circ_{H-bond} \text{ (kcal/mol)} = 0.16$$

$$\text{error of } \ln[k_{PCET} (M^{-1} s^{-1})] = 0.13$$

### 5.17. Entry 17.

Ketone does not quench the luminescence of reductant **7** \*Ir (III). Non-PCET quenching of reductant by acid alone (without ketone) is given by the following equation:

$$\frac{I_0}{I} = 1 + k''_{dSV}A_0$$

In all experiments, the solution was irradiated at wavelength (365nm) that gives highest emission intensity at 491nm. Time-resolved luminescence suggests that the non-PCET quenching by acid is dynamic,  $k''_{dSV} = 11.2$  (**entry 16**). Therefore, the following equation is used:

$$\frac{I_0}{I} = 1 + (k''_{SV} + k_{obs}\tau_0S_0)A_0$$

**Table S5.17.1.  $S_0$  is fixed at 0.0625M.  $A_0$  is varied from 0.001 to 0.002M**

| $A_0/M$ | $S_0A_0/M^2$ | I/au 1 | I/au 2 | I/au 3 | I/au avg. | $I_0/I$  |
|---------|--------------|--------|--------|--------|-----------|----------|
| 0       | 0            |        |        |        |           | 1        |
| 0.001   | 0.0000625    | 501    | 500    | 501    | 500.6667  | 1.963382 |
| 0.0012  | 0.000075     | 452    | 456    | 461    | 456.3333  | 2.154127 |
| 0.0014  | 0.0000875    | 413    | 421    | 420    | 418       | 2.351675 |
| 0.0016  | 0.0001       | 388    | 390    | 390    | 389.3333  | 2.524829 |
| 0.002   | 0.000125     | 338    | 338    | 338    | 338       | 2.908284 |

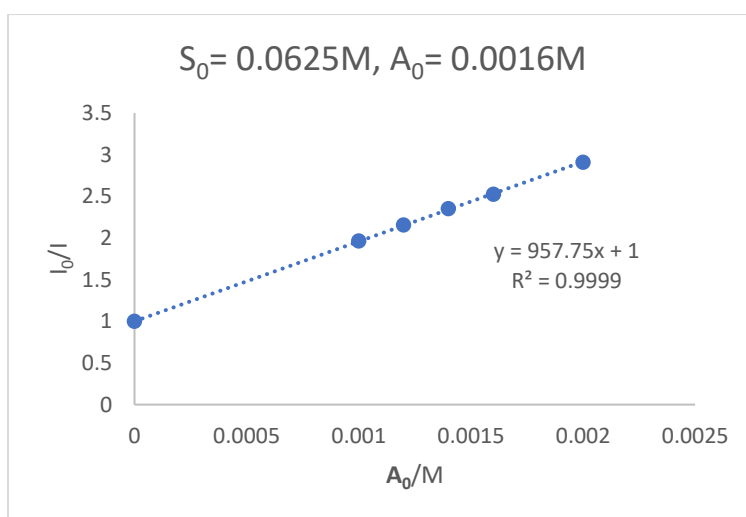

**Figure S5.17.1.** Stern-Volmer plot of luminescence data in **Table S5.17.1**.

$I_0$  was extrapolated from the five data points.

$$k''_{SV} + k_{obs}\tau_0 S_0 = 957.75$$

$$11.2 + k_{obs}\tau_0 \times 0.0625 = 957.75, k_{obs}\tau_0 = 15145$$

**Table S5.17.2.  $S_0$  is fixed at 0.100M.  $A_0$  is varied from 0.000625 to 0.00125M**

| $A_0/M$  | $S_0 A_0/M^2$ | I/au 1 | I/au 2 | I/au 3 | I/au avg. | $I_0/I$  |
|----------|---------------|--------|--------|--------|-----------|----------|
| 0        | 0             |        |        |        |           | 1        |
| 0.000625 | 0.0000625     | 540    | 538    | 538    | 538.6667  | 1.732054 |
| 0.00075  | 0.000075      | 493    | 492    | 496    | 493.6667  | 1.889939 |
| 0.000875 | 0.0000875     | 455    | 455    | 452    | 454       | 2.055066 |
| 0.001    | 0.0001        | 424    | 419    | 422    | 421.6667  | 2.212648 |
| 0.001125 | 0.0001125     | 394    | 392    | 396    | 394       | 2.36802  |
| 0.00125  | 0.000125      | 372    | 373    | 370    | 371.6667  | 2.510314 |

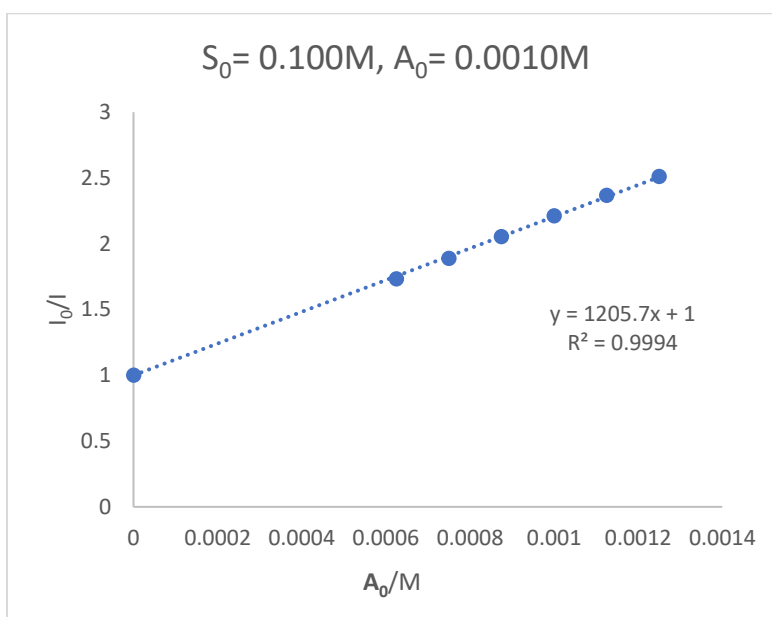

**Figure S5.17.2.** Stern-Volmer plot of luminescence data in **Table S5.17.2.**

$I_0$  was extrapolated from the six data points.

$$k''_{SV} + k_{obs}\tau_0 S_0 = 1205.7$$

$$11.2 + k_{obs}\tau_0 \times 0.1 = 1205.7, k_{obs}\tau_0 = 11950$$

**Table S5.17.3.**  $S_0$  is fixed at 0.125M.  $A_0$  is varied from 0.0004 to 0.0012M

| $A_0/M$ | $S_0A_0/M^2$ | I/au 1 | I/au 2 | I/au 3 | I/au avg. | $I_0/I$  |
|---------|--------------|--------|--------|--------|-----------|----------|
| 0       | 0            |        |        |        |           | 1        |
| 0.0004  | 0.00005      | 598    | 602    | 598    | 599.3333  | 1.510011 |
| 0.0006  | 0.000075     | 509    | 507    | 509    | 508.3333  | 1.780328 |
| 0.0008  | 0.0001       | 446    | 446    | 443    | 445       | 2.033708 |
| 0.001   | 0.000125     | 395    | 393    | 395    | 394.3333  | 2.295013 |
| 0.0012  | 0.00015      | 353    | 351    | 353    | 352.3333  | 2.56859  |

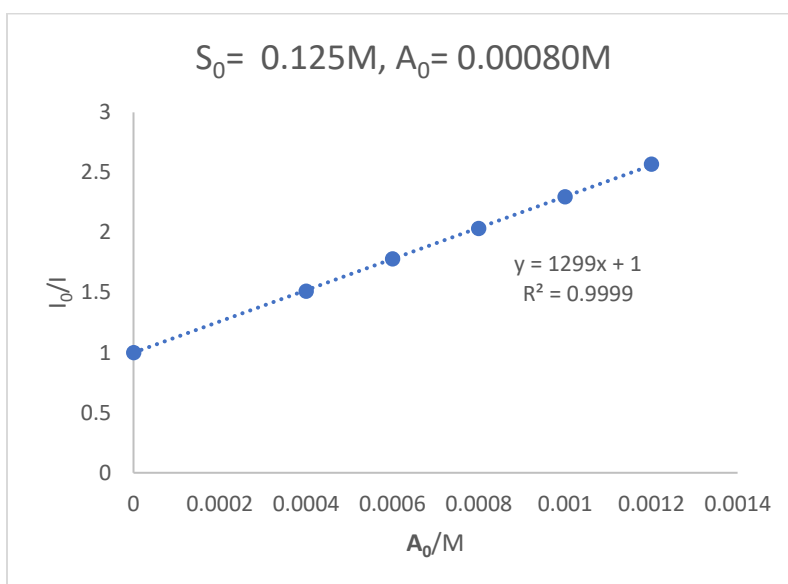

**Figure S5.17.3.** Stern-Volmer plot of luminescence data in Table S5.17.3.

$I_0$  was extrapolated from the five data points.

$$k''_{SV} + k_{obs}\tau_0 S_0 = 1299$$

$$11.2 + k_{obs}\tau_0 \times 0.125 = 1299, k_{obs}\tau_0 = 10300$$

**Table S5.17.4.  $S_0$  fixed at 0.156M.  $A_0$  varied from 0.00016 to 0.00096M**

| $A_0/M$ | $S_0A_0/M^2$ | I/au 1 | I/au 2 | I/au 3 | I/au avg. | $I_0/I$  |
|---------|--------------|--------|--------|--------|-----------|----------|
| 0       | 0            |        |        |        |           | 1        |
| 0.00016 | 0.000025     | 624    | 621    | 619    | 621.3333  | 1.252146 |
| 0.00048 | 0.000075     | 463    | 463    | 464    | 463.3333  | 1.679137 |
| 0.00064 | 0.0001       | 413    | 411    | 411    | 411.6667  | 1.889879 |
| 0.00096 | 0.00015      | 332    | 334    | 332    | 332.6667  | 2.338677 |

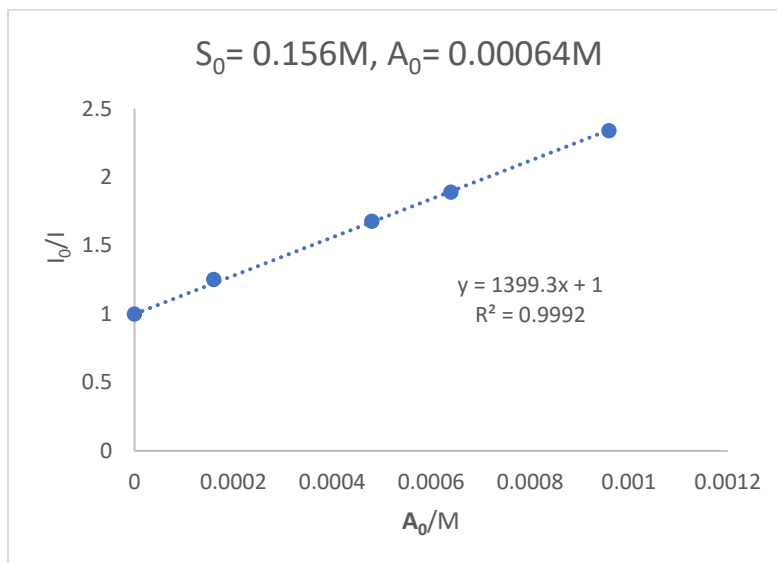

**Figure S5.17.4.** Stern-Volmer plot of luminescence data in **Table S5.17.4.**

$I_0$  was extrapolated from the four data points.

$$k''_{SV} + k_{obs}\tau_0 S_0 = 1399$$

$$11.2 + k_{obs}\tau_0 \times 0.15625 = 1399, k_{obs}\tau_0 = 8883$$

$$S_0 + A_0 = \frac{S_0 A_0 k_{obs} \tau_0}{k_{PCET} \tau_0} + \frac{k_{PCET} \tau_0}{k_{obs} \tau_0} - \frac{1}{K_A} \quad (8)$$

**Table 5.17.5. Solutions to Key Equation 8 and Entry 17 in Table S5.**

|   | $S_0$ (M) | $A_0$ (M) | $S_0 A_0$ (M <sup>2</sup> ) | $S_0 + A_0$ (M) | $k_{obs} \tau_0$ |
|---|-----------|-----------|-----------------------------|-----------------|------------------|
| 1 | 0.0625    | 0.0016    | 0.0001                      | 0.0641          | 15100            |
| 2 | 0.100     | 0.0010    | 0.0001                      | 0.101           | 11900            |
| 3 | 0.125     | 0.00080   | 0.0001                      | 0.126           | 10300            |
| 4 | 0.156     | 0.00064   | 0.0001                      | 0.157           | 8880             |

|                | $K_A/M^{-1}$ | $k_{PCET} \tau_0 / M^{-1}$ |
|----------------|--------------|----------------------------|
| <b>1&amp;2</b> | 14.0         | 2042                       |
| <b>1&amp;3</b> | 14.6         | 1994                       |
| <b>1&amp;4</b> | 14.5         | 2000                       |
| <b>2&amp;3</b> | 16.2         | 1927                       |
| <b>2&amp;4</b> | 15.2         | 1973                       |
| <b>3&amp;4</b> | 14.3         | 2012                       |
| <b>average</b> | 14.8         | 1991                       |

$$\Delta G^\circ_{H-bond} \text{ (kcal/mol)} = -RT \ln K_A = -1.60$$

$$\ln[k_{PCET} (M^{-1} s^{-1})] = \ln[k_{PCET} \tau_0 / \tau_0] = 20.71$$

$$\tau_0 = 2.02 \mu s$$

$$\text{error of } \Delta G^\circ_{H-bond} \text{ (kcal/mol)} = 0.06$$

$$\text{error of } \ln[k_{PCET} (M^{-1} s^{-1})] = 0.06$$



### 5.18. Entry 18.

Non-PCET quenching of reductant by acid alone (without ketone) is given by the following equation:

$$\frac{I_0}{I} = 1 + k''_{dSV}A_0$$

Non-PCET quenching of reductant by ketone alone (without acid) is given by the following equation:

$$I_0/I = 1 + k'_{sv}S_0$$

Time-resolved fluorometry suggest that both ketone and acid dynamically quench reductant **6** \*Ir (III). Therefore, the following equation is used:

$$\frac{I_0}{I} = 1 + \frac{(k''_{sv} + k_{obs}\tau_0S_0)A_0}{1 + k'_{dsv}S_0}$$

$$k'_{dsv} = 0.574 \text{ (see entry 5)}$$

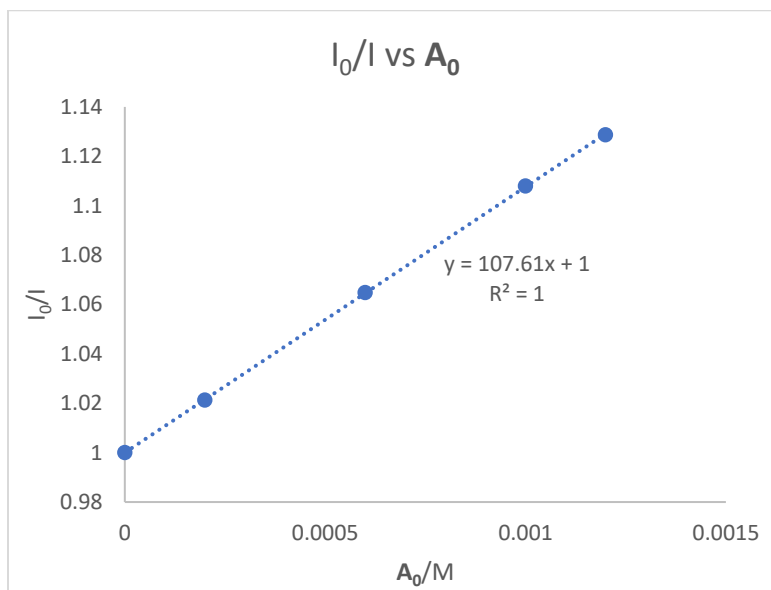

Figure S5.18. Stern-Volmer plot of luminescence data of non-PCET quenching by acid alone

$$k''_{dSV} = 107.6$$

**Table S5.18.1.  $S_0 = 0.0625M$ ,  $A_0 = 0.0008M$ .  $S_0$  fixed at  $0.0625M$ .  $A_0$  varied from  $0.0004$  to  $0.0012M$**

| $A_0/M$ | $S_0A_0/M^2$ | $I/au\ 1$ | $I/au\ 2$ | $I/au\ 3$ | $I/au\ avg.$ | $I_0/I$  |
|---------|--------------|-----------|-----------|-----------|--------------|----------|
| 0       | 0            |           |           |           |              | 1        |
| 0.0004  | 0.000025     | 377       | 377       | 377       | 377          | 2.466844 |
| 0.0006  | 0.0000375    | 300       | 301       | 297       | 299.3333     | 3.106904 |
| 0.0008  | 0.00005      | 246       | 246       | 245       | 245.6667     | 3.785617 |
| 0.001   | 0.0000625    | 208       | 208       | 209       | 208.3333     | 4.464    |
| 0.0012  | 0.000075     | 179       | 180       | 180       | 179.6667     | 5.176252 |

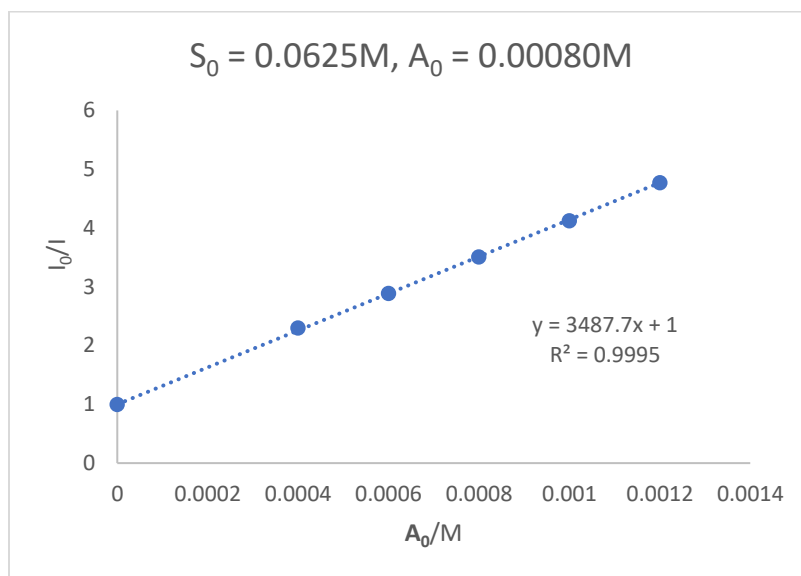

**Figure S5.18.1.** Stern-Volmer plot of luminescence data in **Table S5.18.1**.

$I_0$  was extrapolated from the five data points.

$$\frac{k''_{SV} + k_{obs}\tau_0 S_0}{1 + k'_{dSV} S_0} = 3488$$

$$k''_{SV} + k_{obs}\tau_0 S_0 = 3488 \times (1 + 0.574 \times 0.0625) = 3613$$

$$107.6 + 0.0625 k_{obs}\tau_0 = 3613$$

$$k_{obs}\tau_0 = 56086$$

Substitute  $S_0 = 0.0625$ ,  $A_0 = 0.0008$ ,  $K_A = 14.8$  (from **entry 16**),  $k_{obs}\tau_0 = 56086$  into the equation

$$S_0 + A_0 = \frac{S_0 A_0 k_{obs} \tau_0}{k_{PCET} \tau_0} + \frac{k_{PCET} \tau_0}{k_{obs} \tau_0} - \frac{1}{K_A}$$

$$0.0625 + 0.0008 = \frac{0.0625 \times 0.0008 \times 56086}{k_{PCET} \tau_0} + \frac{k_{PCET} \tau_0}{56086} - \frac{1}{14.8}$$

$$k_{PCET} \tau_0 = 7318$$

**Table S5.18.2.**  $S_0 = 0.100M$ ,  $A_0 = 0.0005M$ .  $S_0$  fixed at  $0.100M$ .  $A_0$  varied from  $0.0001$  to  $0.00075M$

| $A_0/M$    | $S_0 A_0/M^2$ | I/au 1 | I/au 2 | I/au 3 | I/au avg. | $I_0/I$  |
|------------|---------------|--------|--------|--------|-----------|----------|
| 0          | 0             |        |        |        |           | 1        |
| 0.00009375 | 9.375E-06     | 870    | 870    | 870    | 870       | 1.351724 |
| 0.0001875  | 1.875E-05     | 727    | 723    | 726    | 725.3333  | 1.621324 |
| 0.000375   | 0.0000375     | 540    | 542    | 542    | 541.3333  | 2.172414 |
| 0.0005625  | 5.625E-05     | 421    | 423    | 421    | 421.6667  | 2.788933 |
| 0.00075    | 0.000075      | 348    | 348    | 350    | 348.6667  | 3.372849 |

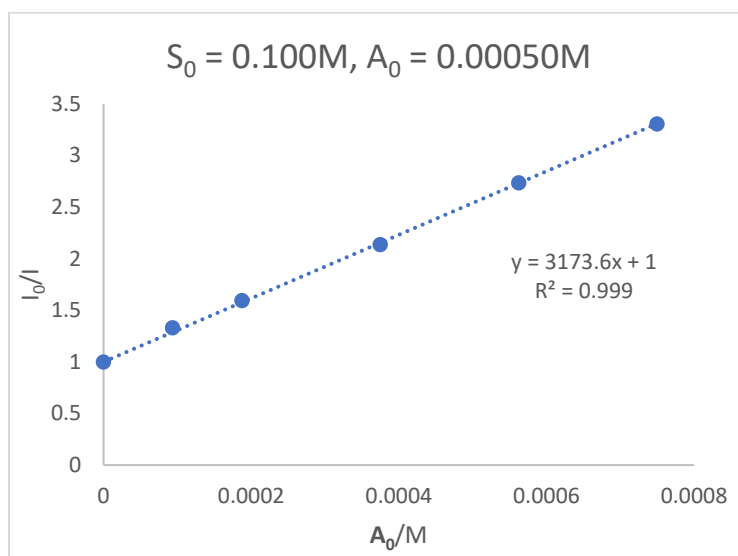

**Figure S5.18.2.** Stern-Volmer plot of luminescence data in **Table S5.18.2.**

$I_0$  was extrapolated from the five data points.

$$\frac{k''_{SV} + k_{obs}\tau_0 S_0}{1 + k'_{dSV} S_0} = 3174$$

$$k''_{SV} + k_{obs}\tau_0 S_0 = 3174 \times (1 + 0.574 \times 0.10) = 3356$$

$$107.6 + 0.1 k_{obs}\tau_0 = 3356$$

$$k_{obs}\tau_0 = 32486$$

Substitute  $S_0 = 0.1000$ ,  $A_0 = 0.0005$ ,  $K_A = 14.8$  (from entry 16),  $k_{obs}\tau_0 = 32486$  into the equation

$$S_0 + A_0 = \frac{S_0 A_0 k_{obs}\tau_0}{k_{PCET}\tau_0} + \frac{k_{PCET}\tau_0}{k_{obs}\tau_0} - \frac{1}{K_A}$$

$$0.10 + 0.0005 = \frac{0.10 \times 0.0005 \times 32486}{k_{PCET}\tau_0} + \frac{k_{PCET}\tau_0}{32486} - \frac{1}{14.8}$$

$$k_{PCET}\tau_0 = 5450$$

Average the two values of  $k_{PCET}\tau_0 = (7318 + 5450)/2 = 6384$

$$\Delta G^\circ_{H\text{-bond}} (\text{kcal/mol}) = -RT \ln K_A = -1.60 \text{ (same as in entry 17)}$$

$$\ln[k_{PCET}(\text{M}^{-1}\text{s}^{-1})] = \ln[k_{PCET}\tau_0/\tau_0] = 21.94$$

$$\tau_0 = 1.9 \mu\text{s}$$

error of  $\Delta G^\circ_{H\text{-bond}} (\text{kcal/mol}) = 0.06$  (same as in entry 17)

$$\text{error of } \ln[k_{PCET}(\text{M}^{-1}\text{s}^{-1})] = 0.16$$

### 5.19. Entry 19.

Time-resolved fluorometry suggests that acid, but not ketone, dynamically quenches reductant **7** \*Ir (III).

Therefore, the following equation is used:

$$\frac{I_0}{I} = 1 + (k''_{SV} + k_{obs}\tau_0 S_0)A_0$$

$$k''_{dSV} = 11.2 \text{ (see Entry 16)}$$

In all experiments, the solution was irradiated at 365nm, and fluorescence was measured at 491nm

**Table S5.19.1.  $S_0$  fixed at 0.040M.  $A_0$  varied from 0.002 to 0.006M**

| $A_0/M$ | $S_0 A_0/M^2$ | I/au 1 | I/au 2 | I/au 3 | I/au avg. | $I_0/I$  |
|---------|---------------|--------|--------|--------|-----------|----------|
| 0       | 0             |        |        |        |           | 1        |
| 0.002   | 0.00008       | 373    | 373    | 370    | 372       | 1.897849 |
| 0.003   | 0.00012       | 305    | 303    | 303    | 303.6667  | 2.324918 |
| 0.004   | 0.00016       | 256    | 256    | 257    | 256.3333  | 2.754226 |
| 0.005   | 0.0002        | 220    | 220    | 221    | 220.3333  | 3.204236 |
| 0.006   | 0.00024       | 192    | 191    | 191    | 191.3333  | 3.689895 |

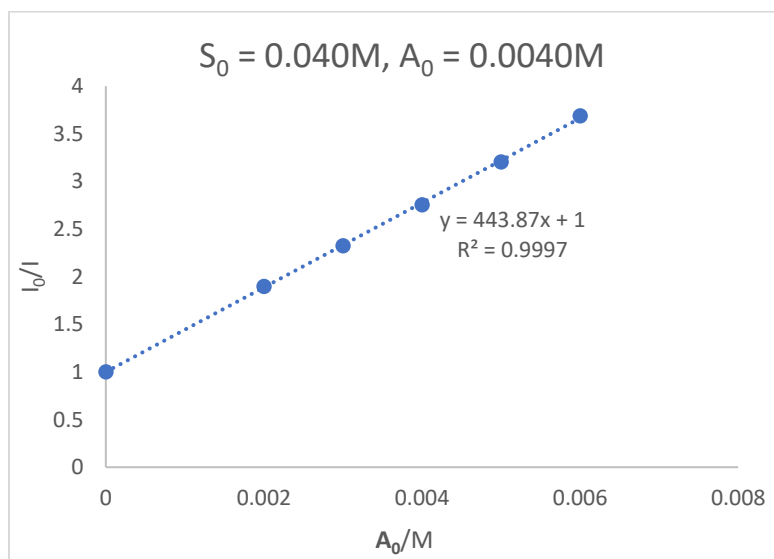

**Figure S5.19.1.** Stern-Volmer plot of luminescence data in **Table S5.19.1.**

$I_0$  was extrapolated from the five data points.

$$k''_{SV} + k_{obs}\tau_0 S_0 = 443.9$$

$$11.2 + k_{obs}\tau_0 \times 0.04 = 443.9, k_{obs}\tau_0 = 10814$$

**Table S5.19.2.  $S_0$  fixed at 0.061M.  $A_0$  varied from 0.003 to 0.006M**

| $A_0/M$ | $S_0 A_0/M^2$ | I/au 1 | I/au 2 | I/au 3 | I/au avg. | $I_0/I$  |
|---------|---------------|--------|--------|--------|-----------|----------|
| 0       | 0             |        |        |        |           | 1        |
| 0.003   | 0.000184      | 231    | 231    | 231    | 231       | 2.69697  |
| 0.004   | 0.000246      | 191    | 191    | 191    | 191       | 3.26178  |
| 0.005   | 0.000307      | 164    | 164    | 165    | 164.3333  | 3.791075 |
| 0.006   | 0.000368      | 140    | 140    | 142    | 140.6667  | 4.42891  |

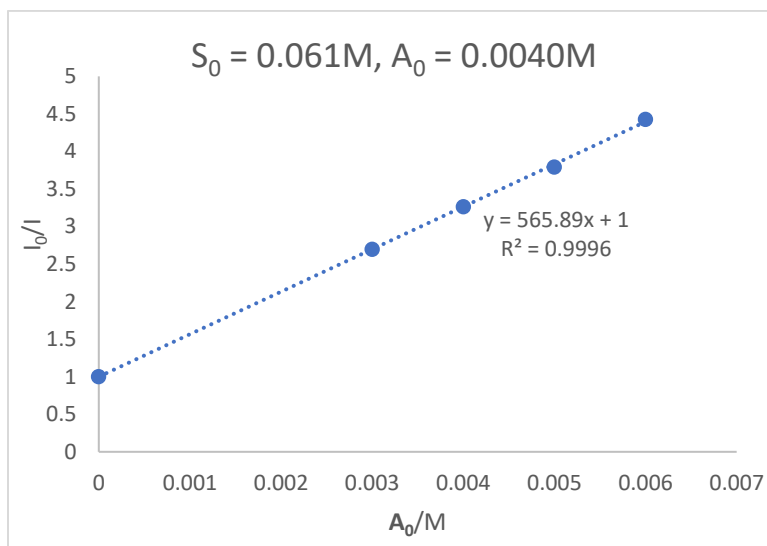

**Figure S5.19.2.** Stern-Volmer plot of luminescence data in **Table S5.19.2.**

$I_0$  was extrapolated from the four data points.

$$k''_{SV} + k_{obs}\tau_0 S_0 = 565.9$$

$$11.2 + k_{obs}\tau_0 \times 0.0614 = 565.9, k_{obs}\tau_0 = 9035$$

Table S5.19.3.  $S_0$  fixed at 0.083M.  $A_0$  varied from 0.003 to 0.006M

| $A_0/M$ | $S_0A_0/M^2$ | I/au 1 | I/au 2 | I/au 3 | I/au avg. | $I_0/I$  |
|---------|--------------|--------|--------|--------|-----------|----------|
| 0       | 0            |        |        |        |           | 1        |
| 0.003   | 0.000249     | 192    | 192    | 193    | 192.3333  | 2.984402 |
| 0.004   | 0.000331     | 157    | 158    | 160    | 158.3333  | 3.625263 |
| 0.005   | 0.000414     | 135    | 133    | 134    | 134       | 4.283582 |
| 0.006   | 0.000497     | 115    | 115    | 115    | 115       | 4.991304 |

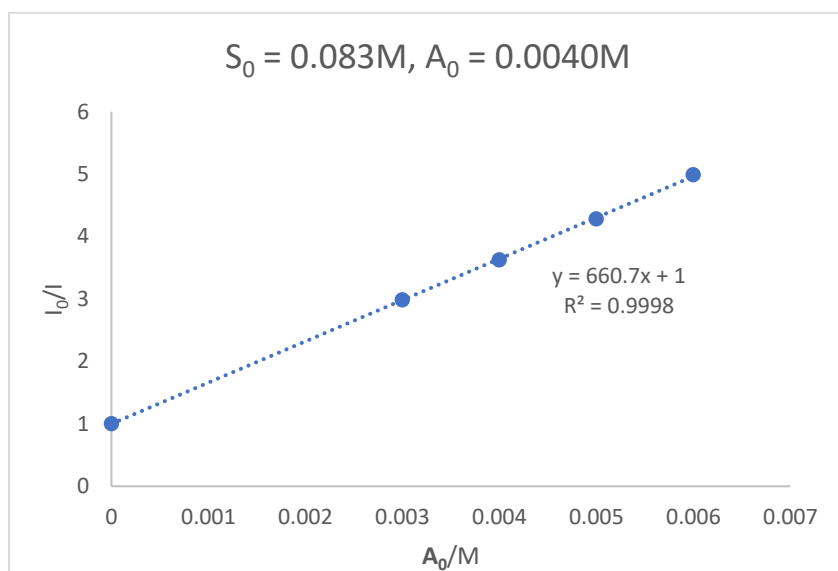

Figure S5.19.3. Stern-Volmer plot of luminescence data in Table S5.19.3.

$I_0$  was extrapolated from the four data points.

$$k''_{SV} + k_{obs}\tau_0 S_0 = 660.7$$

$$11.2 + k_{obs}\tau_0 \times 0.0614 = 660.7, k_{obs}\tau_0 = 7836$$

Table S5.19.4.  $S_0$  fixed at 0.104M.  $A_0$  varied from 0.003 to 0.006M

| $A_0/M$ | $S_0A_0/M^2$ | I/au 1 | I/au 2 | I/au 3 | I/au avg. | $I_0/I$  |
|---------|--------------|--------|--------|--------|-----------|----------|
| 0       | 0            |        |        |        |           | 1        |
| 0.003   | 0.000311     | 170    | 170    | 170    | 170       | 3.176471 |
| 0.004   | 0.000415     | 138    | 138    | 139    | 138.3333  | 3.903614 |
| 0.005   | 0.000519     | 117    | 116    | 117    | 116.6667  | 4.628571 |
| 0.006   | 0.000622     | 101    | 100    | 100    | 100.3333  | 5.38206  |

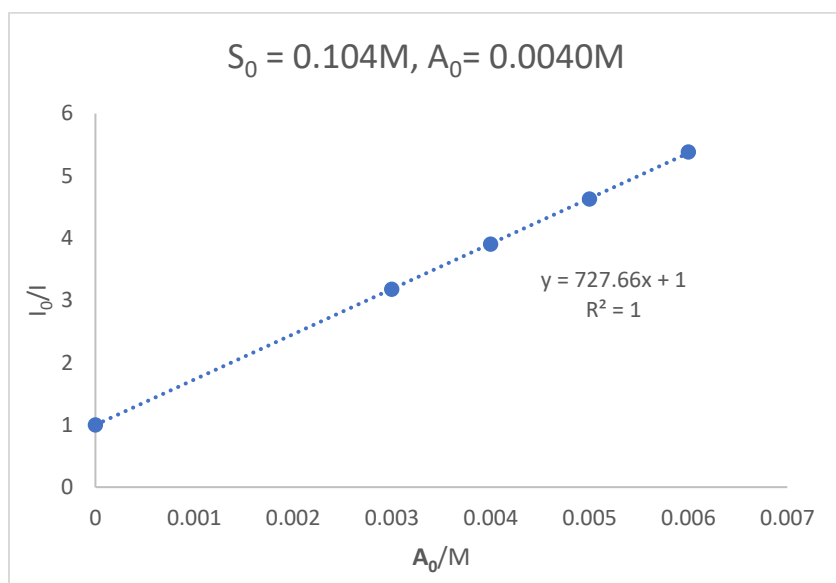

Figure S5.19.4. Stern-Volmer plot of luminescence data in Table S5.19.4.

$I_0$  was extrapolated from the four data points.

$$k''_{SV} + k_{obs}\tau_0 S_0 = 727.7$$

$$11.2 + k_{obs}\tau_0 \times 0.0614 = 727.7, k_{obs}\tau_0 = 6910$$



$$S_0 + A_0 = \frac{S_0 A_0 k_{obs} \tau_0}{k_{PCET} \tau_0} + \frac{k_{PCET} \tau_0}{k_{obs} \tau_0} - \frac{1}{K_A} \quad (8)$$

**Table 5.19.5. Solutions to Key Equation 8 and Entry 19 in Table S5.**

|   | <b>S<sub>0</sub> (M)</b> | <b>A<sub>0</sub> (M)</b> | <b>S<sub>0</sub>A<sub>0</sub> (M<sup>2</sup>)</b> | <b>S<sub>0</sub>+A<sub>0</sub> (M)</b> | <b>k<sub>obs</sub>τ<sub>0</sub></b> |
|---|--------------------------|--------------------------|---------------------------------------------------|----------------------------------------|-------------------------------------|
| 1 | 0.04                     | 0.004                    | 0.00016                                           | 0.044                                  | 10814                               |
| 2 | 0.061                    | 0.004                    | 0.000244                                          | 0.065                                  | 9035                                |
| 3 | 0.083                    | 0.004                    | 0.000332                                          | 0.087                                  | 7836                                |
| 4 | 0.104                    | 0.004                    | 0.000416                                          | 0.108                                  | 6910                                |

  

|                | <b>K<sub>A</sub>/M<sup>-1</sup></b> | <b>k<sub>PCET</sub>τ<sub>0</sub>/M<sup>-1</sup></b> |
|----------------|-------------------------------------|-----------------------------------------------------|
| <b>1&amp;2</b> | 15.6                                | 1152                                                |
| <b>1&amp;3</b> | 14.8                                | 1193                                                |
| <b>1&amp;4</b> | 14.6                                | 1201                                                |
| <b>2&amp;3</b> | 13.7                                | 1236                                                |
| <b>2&amp;4</b> | 13.8                                | 1227                                                |
| <b>3&amp;4</b> | 14.1                                | 1218                                                |
| <b>average</b> | 14.4                                | 1205                                                |

$$\Delta G^{\circ}_{\text{H-bond}} (\text{kcal/mol}) = -RT \ln K_A = -1.58$$

$$\ln[k_{\text{PCET}} (\text{M}^{-1} \text{s}^{-1})] = \ln[k_{\text{PCET}} \tau_0 / \tau_0] = 20.21$$

$$\tau_0 = 2.02 \mu\text{s}$$

$$\text{error of } \Delta G^{\circ}_{\text{H-bond}} (\text{kcal/mol}) = 0.03$$

$$\text{error of } \ln[k_{\text{PCET}} (\text{M}^{-1} \text{s}^{-1})] = 0.03$$

## 5.20. Entry 20.

Non-PCET quenching of reductant by acid alone (without ketone) is given by the following equation:

$$\frac{I_0}{I} = 1 + k''_{dSV}A_0$$

$$k''_{dSV} = 107.6 \text{ (entry 18)}$$

Therefore, the following equation is used:

$$\frac{I_0}{I} = 1 + (k''_{SV} + k_{obs}\tau_0S_0)A_0$$

The solution was irradiated at 375nm, and fluorescence was measured at 518nm.

**Table S5.20.1.  $S_0 = 0.0357\text{M}$ ,  $A_0 = 0.0006\text{M}$ .  $S_0$  fixed at  $0.0357\text{M}$ .  $A_0$  varied from  $0.0001$  to  $0.0009\text{M}$**

| $A_0/\text{M}$ | $S_0A_0/\text{M}^2$ | I/au 1 | I/au 2 | I/au 3 | I/au avg. | $I_0/I$  |
|----------------|---------------------|--------|--------|--------|-----------|----------|
| 0              | 0                   |        |        |        |           | 1        |
| 0.000145       | 5.16998E-06         | 411    | 412    | 410    | 411       | 1.175182 |
| 0.000435       | 1.55099E-05         | 320    | 321    | 321    | 320.6667  | 1.506237 |
| 0.00058        | 2.06799E-05         | 288    | 289    | 290    | 289       | 1.67128  |
| 0.000725       | 2.58499E-05         | 262    | 264    | 262    | 262.6667  | 1.838832 |
| 0.00087        | 3.10199E-05         | 240    | 240    | 241    | 240.3333  | 2.009709 |

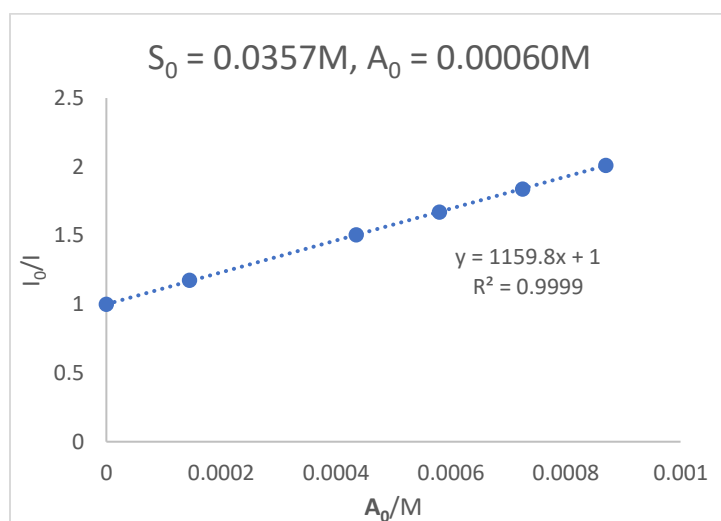

**Figure S5.20.1.** Stern-Volmer plot of luminescence data in **Table S5.20.1.**

$I_0$  was extrapolated from the five data points.

$$k''_{SV} + k_{obs}\tau_0 S_0 = 1160$$

$$107.6 + k_{obs}\tau_0 \times 0.0357 = 1160, k_{obs}\tau_0 = 29480$$

**Table S5.20.2. Repeat  $S_0 = 0.0357M$ ,  $A_0 = 0.0006M$ .  $S_0$  fixed at  $0.0357M$ .  $A_0$  varied from  $0.0001$  to  $0.0009M$**

| $A_0/M$  | $S_0 A_0/M^2$ | $I/au\ 1$ | $I/au\ 2$ | $I/au\ 3$ | $I/au\ avg.$ | $I_0/I$  |
|----------|---------------|-----------|-----------|-----------|--------------|----------|
| 0        | 0             |           |           |           |              | 1        |
| 0.00029  | 1.034E-05     | 325       | 324       | 324       | 324.3333     | 1.31038  |
| 0.000435 | 1.55099E-05   | 290       | 292       | 290       | 290.6667     | 1.462156 |
| 0.00058  | 2.06799E-05   | 263       | 265       | 263       | 263.6667     | 1.611884 |
| 0.000725 | 2.58499E-05   | 240       | 240       | 242       | 240.6667     | 1.765928 |
| 0.00087  | 3.10199E-05   | 221       | 220       | 220       | 220.3333     | 1.928896 |

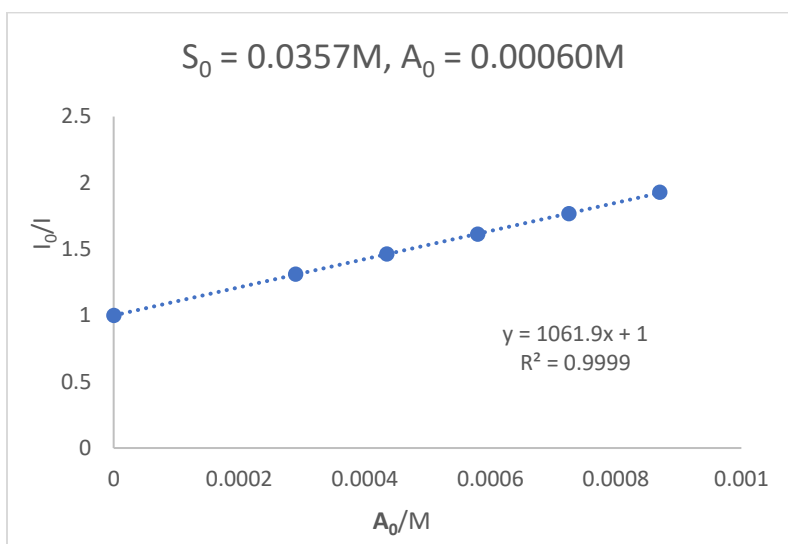

**Figure S5.20.2.** Stern-Volmer plot of luminescence data in **Table S5.20.2.**

$I_0$  was extrapolated from the five data points.

$$k''_{SV} + k_{obs}\tau_0 S_0 = 1062$$

$$107.6 + k_{obs}\tau_0 \times 0.0357 = 1062, k_{obs}\tau_0 = 26720$$

$$\text{Average } k_{obs}\tau_0 = (29480 + 26720)/2 = 28100$$

Substitute  $S_0=0.0357$ ,  $A_0=0.0006$ ,  $K_A=21.3$  (from **entry 16**),  $k_{obs}\tau_0=28100$  into the equation

$$S_0 + A_0 = \frac{S_0 A_0 k_{obs} \tau_0}{k_{PCET} \tau_0} + \frac{k_{PCET} \tau_0}{k_{obs} \tau_0} - \frac{1}{K_A}$$

$$0.0357 + 0.0006 = \frac{0.0357 \times 0.0006 \times 28100}{k_{PCET} \tau_0} + \frac{k_{PCET} \tau_0}{28100} - \frac{1}{21.3}$$

$$k_{PCET} \tau_0 = 2300$$

$$\Delta G^\circ_{\text{H-bond}} (\text{kcal/mol}) = -RT \ln K_A = -1.81 \text{ (same as entry 16)}$$

$$\ln[k_{PCET} (\text{M}^{-1}\text{s}^{-1})] = \ln[k_{PCET} \tau_0 / \tau_0] = 20.93$$

$$\tau_0 = 2.02 \mu\text{s}$$

$$\text{error of } \Delta G^\circ_{\text{H-bond}} (\text{kcal/mol}) = 0.16 \text{ (same as entry 16)}$$

$$\text{error of } \ln[k_{PCET} (\text{M}^{-1}\text{s}^{-1})] = 0.13 \text{ (same as entry 16)}$$

## 6. Brønsted Slopes of Bulkier Ketone-Acid Adduct

We used (PhO)<sub>2</sub>P(O)OH as the Brønsted acid in all experiments. In each series, i.e. same acid and ketone, driving force was varied by the reduction potential of the photo reductant only.

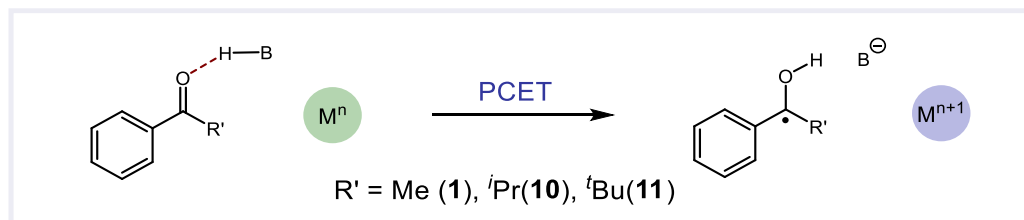

### 6.1. Series of iso-propyl phenyl ketone

In the four data points, same ketone and acid were used in all. Four photocatalyst are used as the reductant. Iso-propyl phenyl ketone does not affect the luminescence of reductant **6** \*Ir (III) or reductant **7** \*Ir (III), and dynamically quench reductant **8** \*Ir (III) and reductant **9** \*Ir (III).

#### 6.1.1.1a Reductant **6** Experiment 1a

Neither ketone nor acid quench the luminescence of reductant **6** \*Ir (III). Therefore, the following equation is used:

$$\frac{I_0}{I} = 1 + k_{obs}\tau_0 S_0 A_0$$

The solution was irradiated at 375nm and fluorescence was measured at 518nm.

**Table S6.1.1.1a. S<sub>0</sub> fixed at 0.025 M, A<sub>0</sub> varied from 0.001 to 0.006 M**

| A <sub>0</sub> /M | S <sub>0</sub> A <sub>0</sub> /M <sup>2</sup> | I/au 1 | I/au 2 | I/au 3 | I/au avg. | I <sub>0</sub> /I |
|-------------------|-----------------------------------------------|--------|--------|--------|-----------|-------------------|
| 0                 | 0                                             |        |        |        |           | 1                 |
| 0.001             | 0.000025                                      | 503    | 503    | 503    | 503       | 1.059642          |
| 0.002             | 0.00005                                       | 476    | 475    | 475    | 475.3333  | 1.121318          |
| 0.004             | 0.0001                                        | 431    | 431    | 430    | 430.6667  | 1.237616          |
| 0.005             | 0.000125                                      | 413    | 415    | 415    | 414.3333  | 1.286404          |
| 0.006             | 0.00015                                       | 400    | 400    | 400    | 400       | 1.3325            |

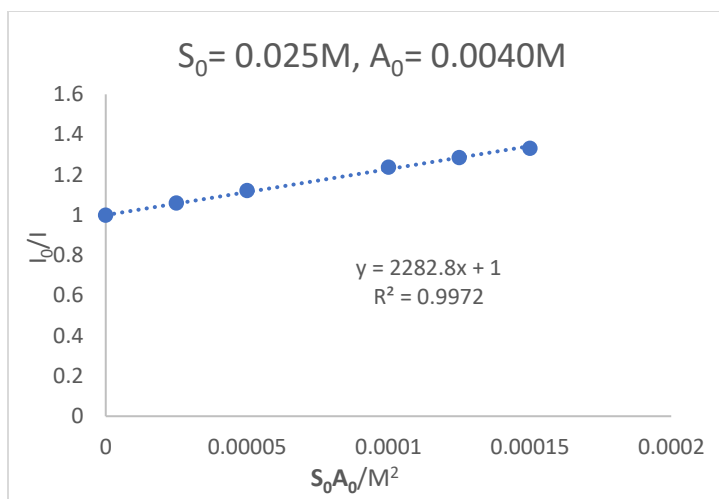

**Figure S6.1.1.1a.** Stern-Volmer plot of luminescence data in **Table S6.1.1.1a.**

$I_0$  was extrapolated from the five data points.

$$k_{obs}\tau_0 = 2283$$

**6.1.1.1b Reductant 6 Experiment 1b**

The solution was irradiated at 375nm and fluorescence was measured at 518nm.

**Table S6.1.1.1b. Repeat-  $S_0$  fixed at 0.0250 M,  $A_0$  varied from 0.001 to 0.006 M**

| $A_0/M$ | $S_0A_0/M^2$ | I/au 1 | I/au 2 | I/au 3 | I/au avg. | $I_0/I$  |
|---------|--------------|--------|--------|--------|-----------|----------|
| 0       | 0            |        |        |        |           | 1        |
| 0.001   | 0.000025     | 460    | 458    | 458    | 458.6667  | 1.059593 |
| 0.002   | 0.00005      | 433    | 434    | 434    | 433.6667  | 1.120676 |
| 0.003   | 0.000075     | 416    | 413    | 413    | 414       | 1.173913 |
| 0.004   | 0.0001       | 396    | 395    | 395    | 395.3333  | 1.229342 |
| 0.005   | 0.000125     | 376    | 376    | 375    | 375.6667  | 1.2937   |
| 0.006   | 0.00015      | 358    | 359    | 356    | 357.6667  | 1.358807 |

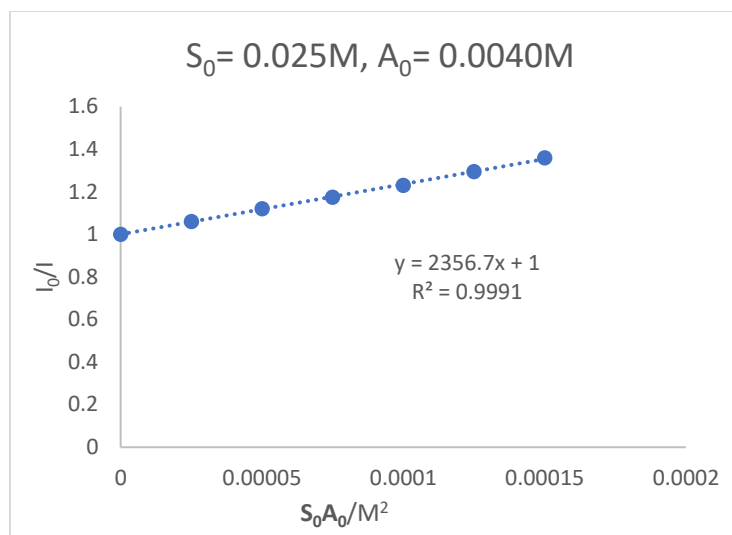

**Figure S6.1.1.1b.** Stern-Volmer plot of luminescence data in **Table S6.1.1.1b.**

$I_0$  was extrapolated from the six data points.

$$k_{obs}\tau_0 = 2357$$

$$k_{obs}\tau_0 \text{ average} = (2283+2357)/2 = 2320 \pm 37$$

### 6.1.1.2. Reductant 6 Experiment 2

The solution was irradiated at 375nm and fluorescence was measured at 518nm.

**Table S6.1.1.2.  $S_0$  fixed at 0.050 M,  $A_0$  varied from 0.003 to 0.006 M**

| $A_0/\text{M}$ | $S_0A_0/\text{M}^2$ | I/au 1 | I/au 2 | I/au 3 | I/au avg. | $I_0/I$  |
|----------------|---------------------|--------|--------|--------|-----------|----------|
| 0              | 0                   |        |        |        |           | 1        |
| 0.003          | 0.00015             | 184    | 185    | 184    | 184.3333  | 1.323689 |
| 0.004          | 0.0002              | 171    | 172    | 170    | 171       | 1.426901 |
| 0.005          | 0.00025             | 160    | 159    | 159    | 159.3333  | 1.531381 |
| 0.006          | 0.0003              | 150    | 148    | 148    | 148.6667  | 1.641256 |

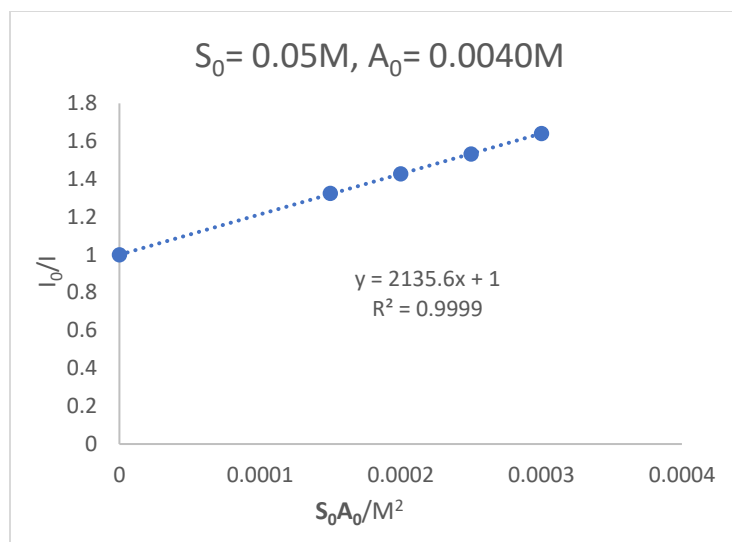

Figure S6.1.1.2. Stern-Volmer plot of luminescence data in Table S6.1.1.2.

$I_0$  was extrapolated from the four data points.

$$k_{obs}\tau_0 = 2136$$

### 6.1.1.3. Reductant 6 Experiment 3

The solution was irradiated at 375nm and fluorescence was measured at 518nm.

Table S6.1.1.3.  $S_0$  fixed at 0.100 M,  $A_0$  varied from 0.0005 to 0.0025M

| $A_0/M$ | $S_0A_0/M^2$ | I/au 1 | I/au 2 | I/au 3 | I/au avg. | $I_0/I$  |
|---------|--------------|--------|--------|--------|-----------|----------|
| 0       | 0            |        |        |        |           | 1        |
| 0.0005  | 0.00005      | 472    | 473    | 473    | 472.6667  | 1.100141 |
| 0.001   | 0.0001       | 441    | 442    | 443    | 442       | 1.176471 |
| 0.0015  | 0.00015      | 409    | 409    | 410    | 409.3333  | 1.270358 |
| 0.002   | 0.0002       | 383    | 383    | 378    | 381.3333  | 1.363636 |
| 0.0025  | 0.00025      | 352    | 352    | 356    | 353.3333  | 1.471698 |



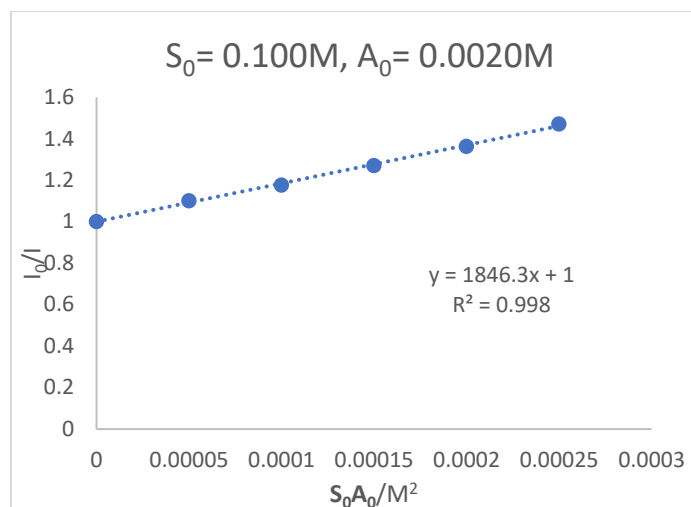

Figure S6.1.1.3. Stern-Volmer plot of luminescence data in Table S6.1.1.3.

$I_0$  was extrapolated from the five data points.

$$k_{obs}\tau_0 = 1846$$

Table S6.1.1.4. Solutions to Key Equation 8

|   | $S_0$ (M) | $A_0$ (M) | $S_0 A_0$ ( $\text{M}^2$ ) | $S_0 + A_0$ (M) | $k_{obs}\tau_0$ |
|---|-----------|-----------|----------------------------|-----------------|-----------------|
| 1 | 0.025     | 0.0040    | 0.0001                     | 0.029           | 2320            |
| 2 | 0.050     | 0.0040    | 0.0002                     | 0.054           | 2140            |
| 3 | 0.100     | 0.0020    | 0.0002                     | 0.10            | 1850            |

  

|                | $K_A / \text{M}^{-1}$ | $k_{PCET}\tau_0 / \text{M}^{-1}$ |
|----------------|-----------------------|----------------------------------|
| <b>1&amp;2</b> | 3.9                   | 665                              |
| <b>1&amp;3</b> | 3.9                   | 658                              |
| <b>2&amp;3</b> | 4.0                   | 654                              |
| <b>avg</b>     | 3.9                   | 659                              |

$$\Delta G^\circ_{\text{H-bond}} (\text{kcal/mol}) = -RT \ln K_A = -0.806$$

$$\ln[k_{PCET}(\text{M}^{-1}\text{s}^{-1})] = \ln[k_{PCET}\tau_0/\tau_0] = 19.664$$

$$\tau_0 = 1.9 \text{ us}$$

error of  $\Delta G^\circ_{\text{H-bond}}$  (kcal/mol) = 0.01

error of  $\ln[k_{\text{PCET}} (\text{M}^{-1}\text{s}^{-1})]$  = 0.01

### 6.1.2. Reductant 9

In all experiments, the solution was irradiated at 370nm and fluorescence was measured at 500nm.

The luminescence of \*Ir (III) is not affected by  $(\text{PhO})_2\text{P}(\text{O})\text{OH}$  and is dynamically quenched by iso-propyl phenyl ketone. Therefore, the following equation is used:

$$\frac{I_0}{I} = 1 + \frac{k_{\text{obs}}\tau_0 S_0 A_0}{1 + k'_{\text{dSV}} S_0}$$

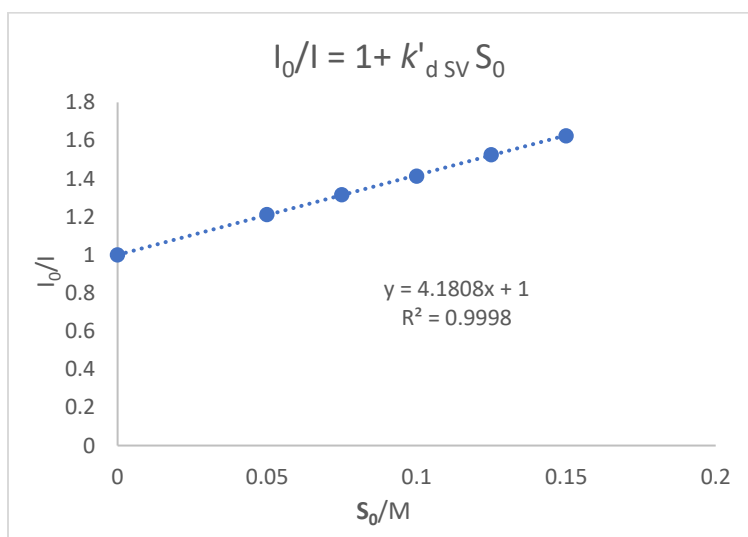

**Figure S6.1.2.** Stern-Volmer plot of luminescence data of non-PCET quenching by ketone alone

$$\frac{I_0}{I} = 1 + k'_{\text{dSV}} S_0$$

$$k'_{\text{dSV}} = 4.2$$

6.1.2.1 Reductant 9 Experiment 1

Table S6.1.2.1.  $S_0$  fixed at 0.025M,  $A_0$  varied from 0.001 to 0.006M

| $A_0/M$ | $S_0A_0/M^2$ | I/au 1 | I/au 2 | I/au 3 | I/au avg. | $I_0/I$  |
|---------|--------------|--------|--------|--------|-----------|----------|
| 0       | 0            |        |        |        |           | 1        |
| 0.001   | 0.000025     | 796    | 796    | 796    | 796       | 1.129397 |
| 0.003   | 0.000075     | 660    | 662    | 662    | 661.3333  | 1.359375 |
| 0.004   | 0.0001       | 613    | 613    | 613    | 613       | 1.466558 |
| 0.005   | 0.000125     | 566    | 568    | 566    | 566.6667  | 1.586471 |
| 0.006   | 0.00015      | 530    | 530    | 528    | 529.3333  | 1.698363 |

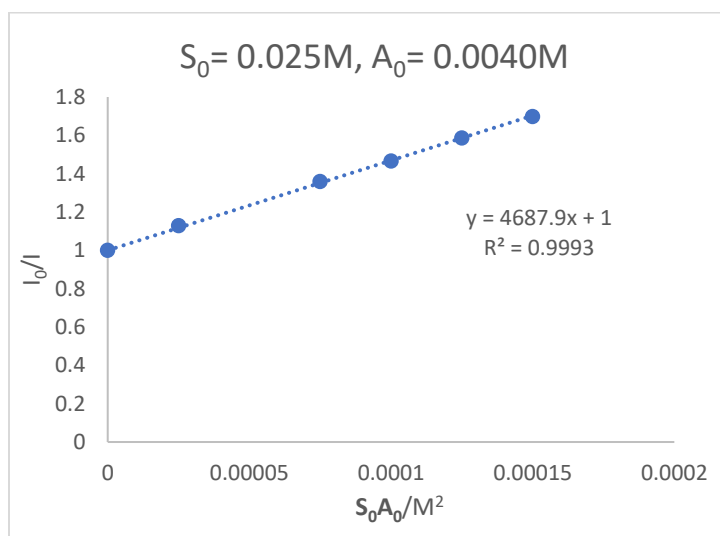

Figure S6.1.2.1. Stern-Volmer plot of luminescence data in Table S6.1.2.1.

$I_0$  was extrapolated from the five data points.

$$k_{obs}\tau_0 = 4688 \times (1 + k'_{dSV}S_0)$$

$$= 4688 \times (1 + 4.2 \times 0.025)$$

$$= 5180$$

6.1.2.2 Reductant 9 Experiment 2

Table S6.1.2.2. Repeat-  $S_0$  fixed at 0.025M,  $A_0$  varied from 0.001 to 0.006M

| $A_0/M$ | $S_0A_0/M^2$ | I/au 1 | I/au 2 | I/au 3 | I/au avg. | $I_0/I$  |
|---------|--------------|--------|--------|--------|-----------|----------|
| 0       | 0            |        |        |        |           | 1        |
| 0.001   | 0.000025     | 636    | 635    | 633    | 634.6667  | 1.136029 |
| 0.002   | 0.00005      | 571    | 570    | 568    | 569.6667  | 1.265652 |
| 0.004   | 0.0001       | 475    | 474    | 475    | 474.6667  | 1.518961 |
| 0.005   | 0.000125     | 438    | 434    | 437    | 436.3333  | 1.652406 |
| 0.006   | 0.00015      | 405    | 403    | 405    | 404.3333  | 1.783182 |

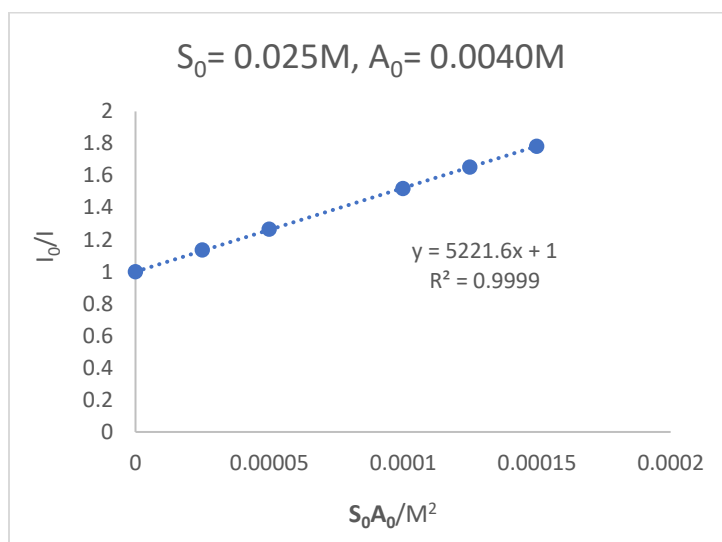

Figure S6.1.2.2. Stern-Volmer plot of luminescence data in Table S6.1.2.2.

$I_0$  was extrapolated from the five data points.

$$k_{obs}\tau_0 = 5222 \times (1 + k'_{d,SV}S_0)$$

$$= 5222 \times (1 + 4.2 \times 0.025)$$

$$= 5770$$

$$k_{obs}\tau_0 \text{ average} = (5180+5770)/2 = 5475 \pm 295$$

Substitute  $S_0= 0.025$ ,  $A_0= 0.004$ ,  $K_A= 3.9$ ,  $k_{obs}\tau_0 = 5475$  into the equation

$$S_0 + A_0 = \frac{S_0 A_0 k_{obs}\tau_0}{k_{PCET}\tau_0} + \frac{k_{PCET}\tau_0}{k_{obs}\tau_0} - \frac{1}{K_A}$$

$$0.025 + 0.004 = \frac{0.025 \times 0.004 \times 5475}{k_{PCET}\tau_0} + \frac{k_{PCET}\tau_0}{5475} - \frac{1}{3.9}$$

$$k_{PCET\ SV} = 1542 \pm 83$$

$$\ln[k_{PCET}(M^{-1}s^{-1})] = \ln[k_{PCET}\tau_0/\tau_0] = 20.56$$

$$\tau_0 = 1.82\mu s$$

$$\text{error of } \ln[k_{PCET} (M^{-1}s^{-1})] = 0.05$$

### 6.1.3. Reductant **8**

Non-PCET quenching of reductant by acid alone (without ketone) is given by the following equation:

$$\frac{I_0}{I} = 1 + k''_{dSV}A_0$$

$$k''_{dSV} = 37.2 \text{ (Entry 6 in Table S5)}$$

Non-PCET quenching of reductant by ketone alone (without acid) is given by the following equation:

$$I_0/I = 1 + k'_{dSV}S_0$$

Time-resolved fluorometry suggest that both ketone and acid dynamically quench reductant **8** \*Ir (III). Therefore, the following equation is used:

$$\frac{I_0}{I} = 1 + \frac{(k''_{SV} + k_{obs}\tau_0S_0)A_0}{1 + k'_{dSV}S_0}$$

In all experiments, the solution was irradiated at 370nm and fluorescence was measured at 491nm.

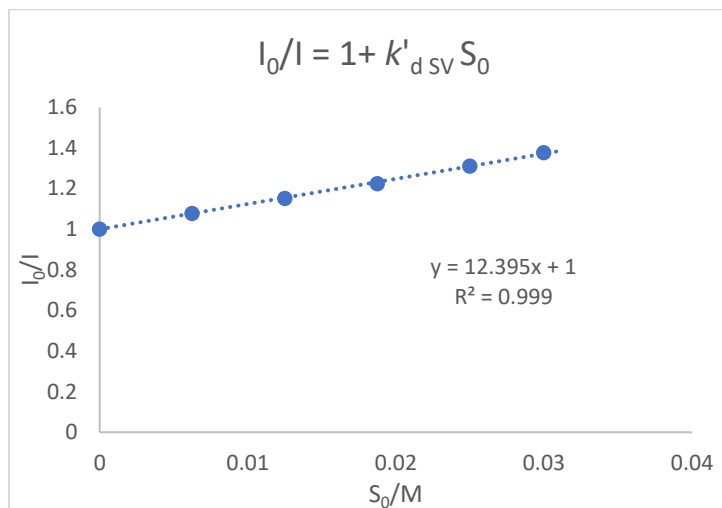

**Figure S6.1.3.** Stern-Volmer plot of luminescence data of non-PCET quenching by ketone alone

$$k'_{dSV} = 12.4$$

6.1.3.1. Reductant 8 Experiment 1

Table S6.1.3.1.  $S_0$  fixed at 0.025M,  $A_0$  varied from 0.001 to 0.006M

| $A_0/M$ | $S_0A_0/M^2$ | I/au 1 | I/au 2 | I/au 3 | I/au avg. | $I_0/I$  |
|---------|--------------|--------|--------|--------|-----------|----------|
| 0       | 0            |        |        |        |           | 1        |
| 0.001   | 0.000025     | 325    | 326    | 325    | 325.3333  | 1.3125   |
| 0.002   | 0.00005      | 267    | 269    | 268    | 268       | 1.593284 |
| 0.003   | 0.000075     | 233    | 233    | 234    | 233.3333  | 1.83     |
| 0.004   | 0.0001       | 205    | 205    | 207    | 205.6667  | 2.076175 |
| 0.005   | 0.000125     | 180    | 180    | 182    | 180.6667  | 2.363469 |
| 0.006   | 0.00015      | 161    | 161    | 160    | 160.6667  | 2.657676 |

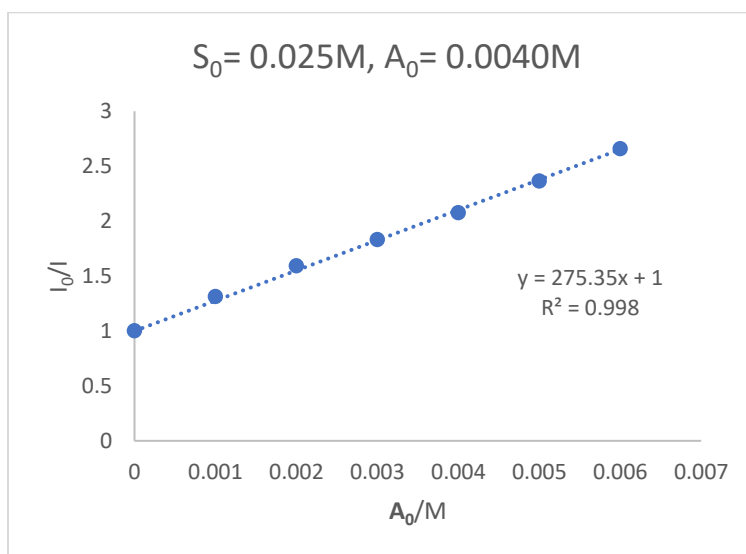

Figure S6.1.3.1. Stern-Volmer plot of luminescence data in Table S6.1.3.1.

$I_0$  was extrapolated from the six data points.

$$\frac{k''_{SV} + k_{obs}\tau_0 S_0}{1 + k'_{dSV} S_0} = 275.35$$

$$k''_{SV} + k_{obs}\tau_0 S_0 = 275 \times (1 + 12.4 \times 0.025) = 361$$

$$37.2 + 0.025 k_{obs}\tau_0 = 361$$

$$k_{obs}\tau_0 = 12952$$

6.1.3.2. Reductant 8 *Experiment 2*

Table S6.1.3.2. Repeat-  $S_0$  fixed at 0.025M,  $A_0$  varied from 0.001 to 0.006M

| $A_0/M$ | $S_0A_0/M^2$ | I/au 1 | I/au 2 | I/au 3 | I/au avg. | $I_0/I$  |
|---------|--------------|--------|--------|--------|-----------|----------|
| 0       | 0            |        |        |        |           | 1        |
| 0.001   | 0.000025     | 250    | 248    | 250    | 249.3333  | 1.287433 |
| 0.002   | 0.00005      | 199    | 199    | 200    | 199.3333  | 1.610368 |
| 0.003   | 0.000075     | 166    | 167    | 168    | 167       | 1.922156 |
| 0.005   | 0.000125     | 125    | 126    | 124    | 125       | 2.568    |
| 0.006   | 0.00015      | 111    | 111    | 111    | 111       | 2.891892 |

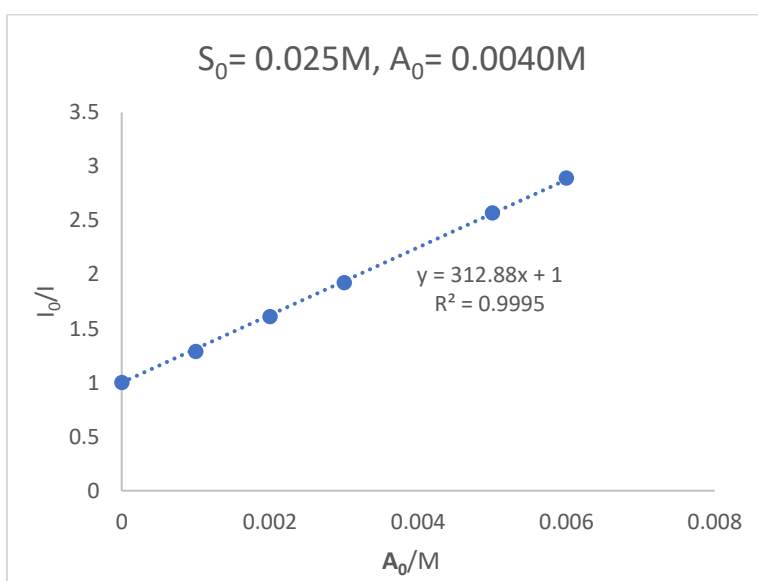

Figure S6.1.3.2. Stern-Volmer plot of luminescence data in Table S6.1.3.2.

$I_0$  was extrapolated from the five data points.

$$\frac{k''_{SV} + k_{obs}\tau_0 S_0}{1 + k'_{dSV} S_0} = 313$$

$$k''_{SV} + k_{obs}\tau_0 S_0 = 313 \times (1 + 12.4 \times 0.025) = 410$$

$$37.2 + 0.025 k_{obs}\tau_0 = 410$$

$$k_{obs} \tau_0 = 14913$$



$$k_{obs}\tau_0 \text{ average} = (12952+14913)/2 = 13933 \pm 980$$

Substitute  $S_0=0.025$ ,  $A_0=0.004$ ,  $K_A=3.9$ ,  $k_{obs}\tau_0 = 13933$  into the equation

$$S_0 + A_0 = \frac{S_0 A_0 k_{obs}\tau_0}{k_{PCET}\tau_0} + \frac{k_{PCET}\tau_0}{k_{obs}\tau_0} - \frac{1}{K_A}$$

$$0.025 + 0.004 = \frac{0.025 \times 0.004 \times 13933}{k_{PCET}\tau_0} + \frac{k_{PCET}\tau_0}{13933} - \frac{1}{3.9}$$

$$k_{PCET}\tau_0 = 3972 \pm 280$$

$$\ln[k_{PCET}(M^{-1}s^{-1})] = \ln[k_{PCET}\tau_0/\tau_0] = 21.63$$

$$\tau_0 = 1.61 \mu s$$

$$\text{error of } \ln[k_{PCET}(M^{-1}s^{-1})] = 0.07$$

### 6.1.4.1 Reductant 7 Experiment 1

Neither ketone nor acid quenches the luminescence of reductant 7 \*Ir (III). Therefore, the following equation is used:

$$\frac{I_0}{I} = 1 + k_{obs}\tau_0 S_0A_0$$

In all experiments, the solution was irradiated at 370nm and fluorescence was measured at 491nm.

**Table S6.1.4.1.  $S_0$  fixed at 0.100M,  $A_0$  varied from 0.005 to 0.015M**

| $A_0/M$ | $S_0A_0/M^2$ | I/au 1 | I/au 2 | I/au 3 | I/au avg. | $I_0/I$  |
|---------|--------------|--------|--------|--------|-----------|----------|
| 0       | 0            |        |        |        |           | 1        |
| 0.005   | 0.0005       | 335    | 335    | 337    | 335.6667  | 1.129096 |
| 0.0075  | 0.00075      | 316    | 318    | 318    | 317.3333  | 1.194328 |
| 0.01    | 0.001        | 301    | 301    | 302    | 301.3333  | 1.257743 |
| 0.0125  | 0.00125      | 288    | 286    | 287    | 287       | 1.320557 |
| 0.015   | 0.0015       | 272    | 272    | 273    | 272.3333  | 1.391677 |

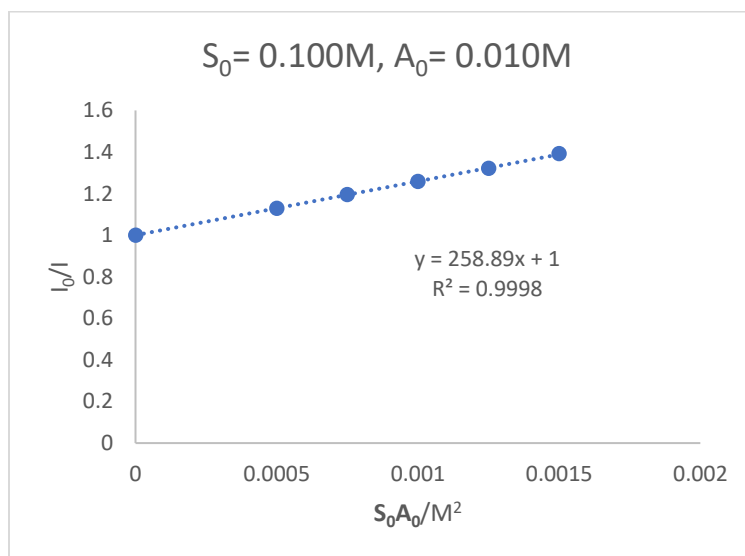

**Figure S6.1.4.1. Stern-Volmer plot of luminescence data in Table S6.1.4.1.**

$I_0$  was extrapolated from the five data points.

$$k_{obs}\tau_0 = 259$$

6.1.4.2. Reductant 7 Experiment 2

Table S6.1.4.2. Repeat-  $S_0$  fixed at 0.100M,  $A_0$  varied from 0.005 to 0.015M

| $A_0/M$ | $S_0A_0/M^2$ | I/au 1 | I/au 2 | I/au 3 | I/au avg. | $I_0/I$  |
|---------|--------------|--------|--------|--------|-----------|----------|
| 0       | 0            |        |        |        |           | 1        |
| 0.005   | 0.0005       | 448    | 448    | 446    | 447.3333  | 1.140089 |
| 0.0075  | 0.00075      | 421    | 422    | 422    | 421.6667  | 1.209486 |
| 0.01    | 0.001        | 398    | 398    | 396    | 397.3333  | 1.283557 |
| 0.0125  | 0.00125      | 375    | 376    | 377    | 376       | 1.356383 |
| 0.015   | 0.0015       | 354    | 356    | 354    | 354.6667  | 1.43797  |

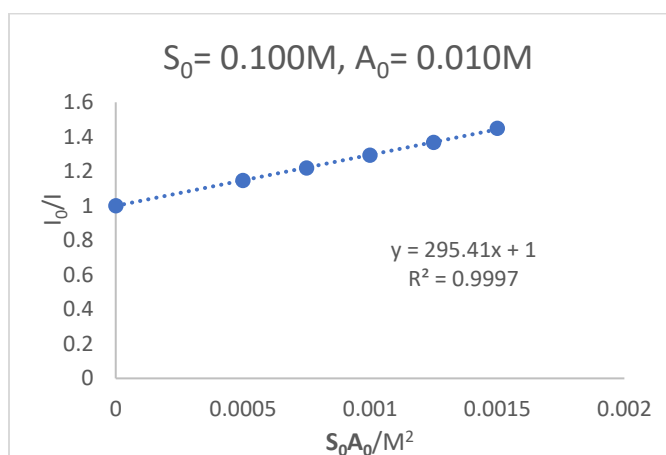

Figure S6.1.4.2. Stern-Volmer plot of luminescence data in Table S6.1.4.2.

$I_0$  was extrapolated from the five data points.

$$k_{obs}\tau_0 = 295$$

$$k_{obs}\tau_0 \text{ average} = (259+295)/2 = 277 \pm 18$$

Substitute  $S_0 = 0.1$ ,  $A_0 = 0.01$ ,  $K_A = 3.9$ ,  $k_{obs}\tau_0 = 273$  into the equation

$$S_0 + A_0 = \frac{S_0A_0 k_{obs}\tau_0}{k_{PCET}\tau_0} + \frac{k_{PCET}\tau_0}{k_{obs}\tau_0} - \frac{1}{K_A}$$

$$k_{PCET}\tau_0 = 99 \pm 5$$

$$\tau_0 = 2.02 \mu\text{s}$$

$$\text{error of } \ln[k_{PCET}(M^{-1}S^{-1})] = 0.09$$

## 6.2. Series of tert-butyl phenyl ketone

### 6.2.1.1. Reductant 6 Experiment 1

Neither ketone nor acid quenches the luminescence of reductant 6 \*Ir (III). Therefore, the following equation is used:

$$\frac{I_0}{I} = 1 + k_{obs}\tau_0 S_0A_0$$

In all experiments, the solution was irradiated at 375nm and fluorescence was measured at 518nm.

**Table S6.2.1.1.  $S_0$  fixed at 0.025M,  $A_0$  varied from 0.001 to 0.006M**

| $A_0/M$ | $S_0A_0/M^2$ | I/au 1 | I/au 2 | I/au 3 | I/au avg. | $I_0/I$  |
|---------|--------------|--------|--------|--------|-----------|----------|
| 0       | 0            |        |        |        |           | 1        |
| 0.001   | 0.000025     | 695    | 695    | 694    | 694.6667  | 1.068138 |
| 0.003   | 0.000075     | 616    | 615    | 614    | 615       | 1.206504 |
| 0.004   | 0.0001       | 582    | 582    | 580    | 581.3333  | 1.276376 |
| 0.005   | 0.000125     | 552    | 553    | 551    | 552       | 1.344203 |
| 0.006   | 0.00015      | 523    | 525    | 525    | 524.3333  | 1.41513  |

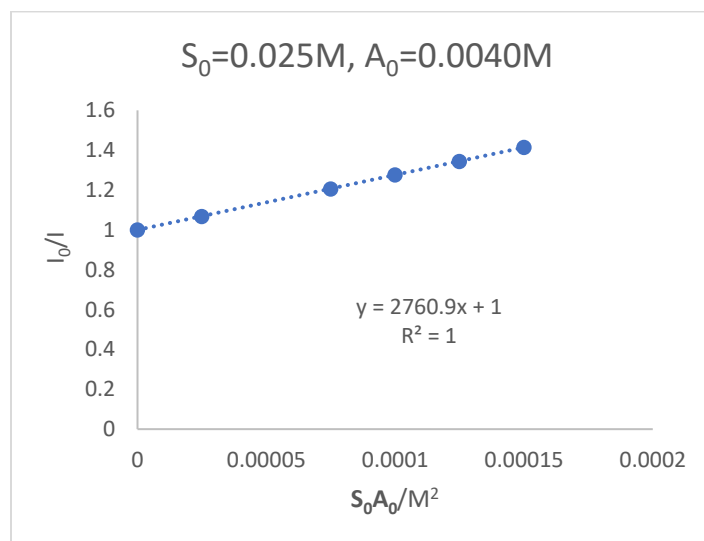

**Figure S6.2.1.1. Stern-Volmer plot of luminescence data in Table S6.2.1.1.**

$I_0$  was extrapolated from the five data points.

$$k_{obs}\tau_0 = 2761$$

### 6.2.1.2. Reductant 6 Experiment 2

Table S6.2.1.2.  $S_0$  fixed at 0.100M,  $A_0$  varied from 0.0005 to 0.00125M

| $A_0/M$ | $S_0A_0/M^2$ | I/au 1 | I/au 2 | I/au 3 | I/au avg. | $I_0/I$  |
|---------|--------------|--------|--------|--------|-----------|----------|
| 0       | 0            |        |        |        |           | 1        |
| 0.0005  | 0.00005      | 612    | 614    | 614    | 613.3333  | 1.115217 |
| 0.00075 | 0.000075     | 580    | 579    | 580    | 579.6667  | 1.179988 |
| 0.001   | 0.0001       | 555    | 554    | 556    | 555       | 1.232432 |
| 0.00125 | 0.000125     | 524    | 526    | 524    | 524.6667  | 1.303685 |

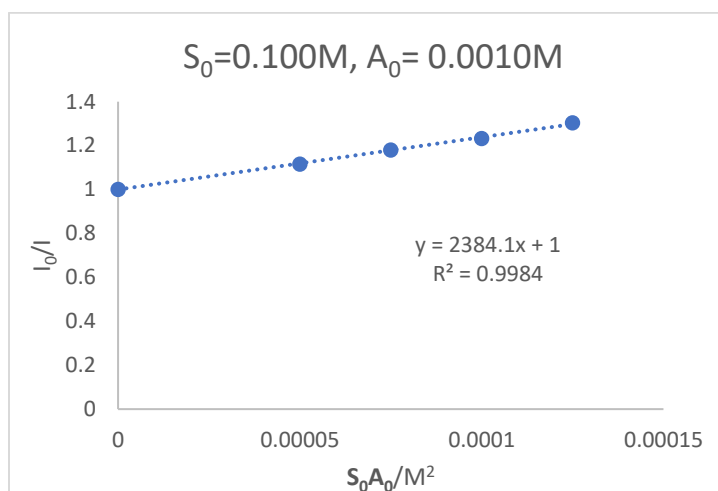

Figure S6.2.1.2. Stern-Volmer plot of luminescence data in Table S6.2.1.2.

$I_0$  was extrapolated from the four data points.

$$k_{obs}\tau_0 = 2384$$

### 6.2.1.3. Reductant 6 Experiment 3

Table S6.2.1.3.  $S_0$  fixed at 0.156M,  $A_0$  varied from 0.00016 to 0.00080M

| $A_0/M$ | $S_0A_0/M^2$ | I/au 1 | I/au 2 | I/au 3 | I/au avg. | $I_0/I$  |
|---------|--------------|--------|--------|--------|-----------|----------|
| 0       | 0            |        |        |        |           | 1        |
| 0.00016 | 0.000025     | 608    | 606    | 606    | 606.6667  | 1.053297 |
| 0.00032 | 0.00005      | 576    | 576    | 576    | 576       | 1.109375 |
| 0.00064 | 0.0001       | 527    | 528    | 528    | 527.6667  | 1.210992 |
| 0.0008  | 0.000125     | 506    | 503    | 503    | 504       | 1.267857 |

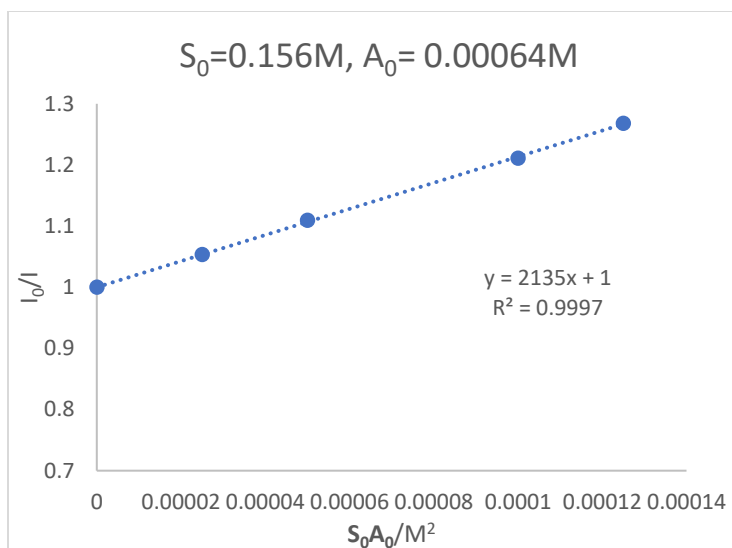

Figure S6.2.1.3. Stern-Volmer plot of luminescence data in Table S6.2.1.3.

$I_0$  was extrapolated from the four data points.

$$k_{obs}\tau_0 = 2135$$

Table S6.2.1.4. Solutions to Key Equation 8

|   | $S_0$ (M)      | $A_0$ (M) | $S_0A_0$ (M <sup>2</sup> ) | $S_0+A_0$ (M)           | $k_{obs}\tau_0$ |
|---|----------------|-----------|----------------------------|-------------------------|-----------------|
| 1 | 0.025          | 0.004     | 0.0001                     | 0.029                   | 2760            |
| 2 | 0.100          | 0.001     | 0.0001                     | 0.101                   | 2380            |
| 3 | 0.156          | 0.00064   | 0.0001                     | 0.157                   | 2140            |
|   |                |           | $K_A/M^{-1}$               | $k_{PCET}\tau_0/M^{-1}$ |                 |
|   | <b>1&amp;2</b> |           | 2.5                        | 1205                    |                 |
|   | <b>1&amp;3</b> |           | 2.7                        | 1120                    |                 |
|   | <b>2&amp;3</b> |           | 2.6                        | 1142                    |                 |
|   | <b>avg</b>     |           | 2.6                        | 1156                    |                 |

$$\Delta G^\circ_{H-bond} \text{ (kcal/mol)} = -RT \ln K_A = -0.57$$

$$\ln[k_{PCET}(M^{-1}s^{-1})] = \ln[k_{PCET}\tau_0/\tau_0] = 20.23$$

$$\tau_0 = 1.9 \text{ us}$$

$$\text{error of } \Delta G^\circ_{H-bond} \text{ (kcal/mol)} = 0.02$$

$$\text{error of } \ln[k_{PCET}(M^{-1}s^{-1})] = 0.03$$

### 6.2.2. Reductant 9

The time-resolved fluorometry suggest that reductant 9 \*Ir (III) is dynamically quenched by ketone. Acid does not quench the luminescence intensity of reductant 9 \*Ir (III). Therefore, the following equation is used:

$$\frac{I_0}{I} = 1 + \frac{k_{obs}\tau_0 S_0 A_0}{1 + k'_{dSV} S_0}$$

Non-PCET quenching of reductant by ketone alone (without acid) is given by the following equation:

$$\frac{I_0}{I} = 1 + k'_{dSV} S_0$$

In all experiments, the solution was irradiated at 370nm and fluorescence was measured at 500nm.

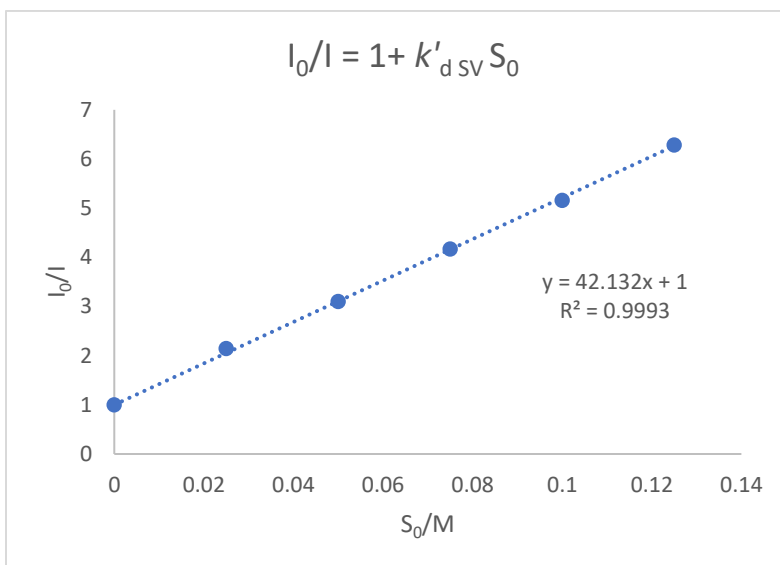

**Figure S6.2.2.** Stern-Volmer plot of luminescence data of non-PCET quenching by ketone alone

$$k'_{dSV} = 42.1$$

6.2.2.1. Reductant 9 Experiment 1

Table S6.2.2.1.  $S_0$  fixed at 0.025M,  $A_0$  varied from 0.001 to 0.006M

| $A_0/M$ | $S_0A_0/M^2$ | I/au 1 | I/au 2 | I/au 3 | I/au avg. | $I_0/I$  |
|---------|--------------|--------|--------|--------|-----------|----------|
| 0       | 0            |        |        |        |           | 1        |
| 0.001   | 0.000025     | 635    | 635    | 632    | 634       | 1.124606 |
| 0.002   | 0.00005      | 579    | 575    | 579    | 577.6667  | 1.234276 |
| 0.003   | 0.000075     | 527    | 523    | 534    | 528       | 1.350379 |
| 0.005   | 0.000125     | 452    | 451    | 454    | 452.3333  | 1.576271 |
| 0.006   | 0.00015      | 414    | 411    | 414    | 413       | 1.726392 |

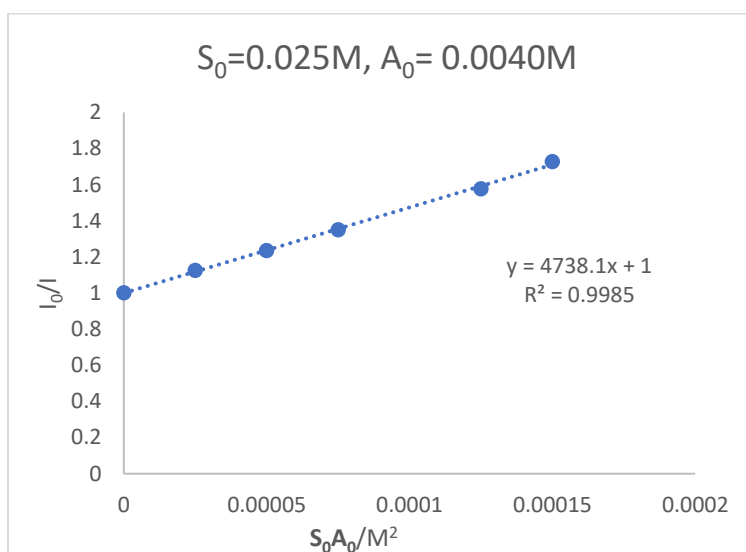

Figure S6.2.2.1. Stern-Volmer plot of luminescence data in Table S6.2.2.1.

$I_0$  was extrapolated from the five data points.

$$\begin{aligned}
 k_{obs}\tau_0 &= 4738 \times (1 + k'_{dSV}S_0) \\
 &= 4738 \times (1 + 42.1 \times 0.025) \\
 &= 9725
 \end{aligned}$$

Substitute  $S_0= 0.025$ ,  $A_0= 0.004$ ,  $K_A= 2.6$ ,  $k_{obs}\tau_0= 9725$  into the equation

$$S_0 + A_0 = \frac{S_0A_0 k_{obs}\tau_0}{k_{PCET}\tau_0} + \frac{k_{PCET}\tau_0}{k_{obs}\tau_0} - \frac{1}{K_A}$$

$$k_{PCET}\tau_0 = 4020$$



6.2.2.2. Reductant 9 Experiment 2

Table S6.2.2.2.  $S_0$  fixed at 0.020M,  $A_0$  varied from 0.00125 to 0.0075M

| $S_0/M$ | $S_0A_0/M^2$ | I/au 1 | I/au 2 | I/au 3 | I/au avg. | $I_0/I$  |
|---------|--------------|--------|--------|--------|-----------|----------|
| 0       | 0            |        |        |        |           | 1        |
| 0.00125 | 0.000025     | 547    | 539    | 540    | 542       | 1.380074 |
| 0.0025  | 0.00005      | 435    | 433    | 436    | 434.6667  | 1.720859 |
| 0.00375 | 0.000075     | 344    | 348    | 348    | 346.6667  | 2.157692 |
| 0.005   | 0.0001       | 286    | 290    | 290    | 288.6667  | 2.591224 |
| 0.00625 | 0.000125     | 249    | 249    | 250    | 249.3333  | 3        |

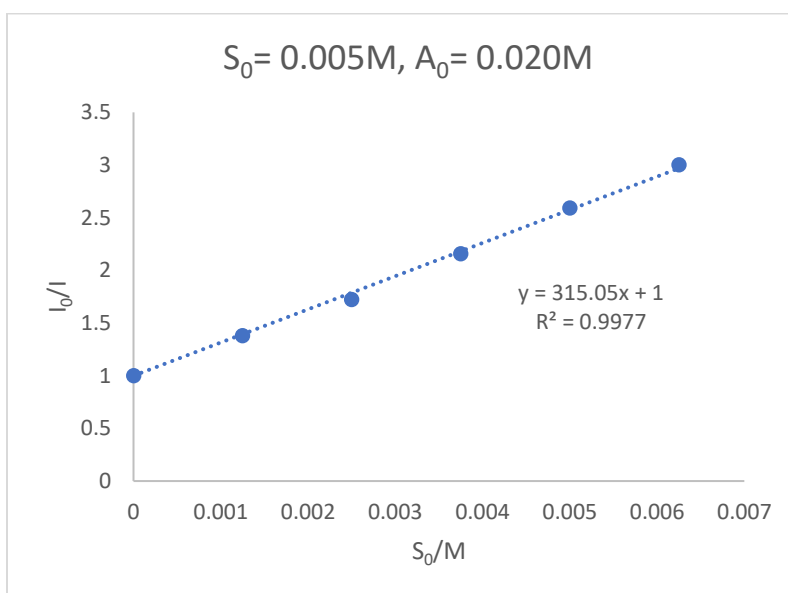

Figure S6.2.2.2. Stern-Volmer plot of luminescence data in Table S6.2.2.2.

$I_0$  was extrapolated from the five data points.

$$k'_{SV} + k_{obs}\tau_0 A_0 = 315$$

$$42.1 + k_{obs}\tau_0 \times 0.02 = 315$$

$$k_{obs}\tau_0 = 13645$$

Substitute  $S_0 = 0.020$ ,  $A_0 = 0.005$ ,  $K_A = 2.6$ ,  $k_{obs}\tau_0 = 13645$  into the equation

$$S_0 + A_0 = \frac{S_0 A_0 k_{obs}\tau_0}{k_{PCET}\tau_0} + \frac{k_{PCET}\tau_0}{k_{obs}\tau_0} - \frac{1}{K_A}$$

$$k_{PCET}\tau_0 = 5586$$

$$k_{PCET}\tau_0 \text{ average} = (4020 + 5586)/2 = 4803 \pm 783$$

$$\ln[k_{PCET}(M^{-1}s^{-1})] = \ln[k_{PCET}\tau_0/\tau_0] = 21.68$$

$$\tau_0 = 1.82 \mu s$$

$$\text{error of } \ln[k_{PCET}(M^{-1}s^{-1})] = 0.16$$

### 6.2.3. Reductant 8

Non-PCET quenching of reductant by acid alone (without ketone) is given by the following equation:

$$\frac{I_0}{I} = 1 + k''_{dSV} A_0$$

$$k''_{dSV} = 37.2 \text{ (entry 6 in Table S5)}$$

Non-PCET quenching of reductant by ketone alone (without acid) is given by the following equation:

$$I_0/I = 1 + k'_{SV} S_0$$

Time-resolved fluorometry suggest that both ketone and acid dynamically quench reductant **8** \*Ir (III). Therefore, the following equation is used:

$$\frac{I_0}{I} = 1 + \frac{(k''_{SV} + k_{obs}\tau_0 S_0) A_0}{1 + k'_{dSV} S_0}$$

In all experiments, the solution was irradiated at 370nm and fluorescence was measured at 491nm.

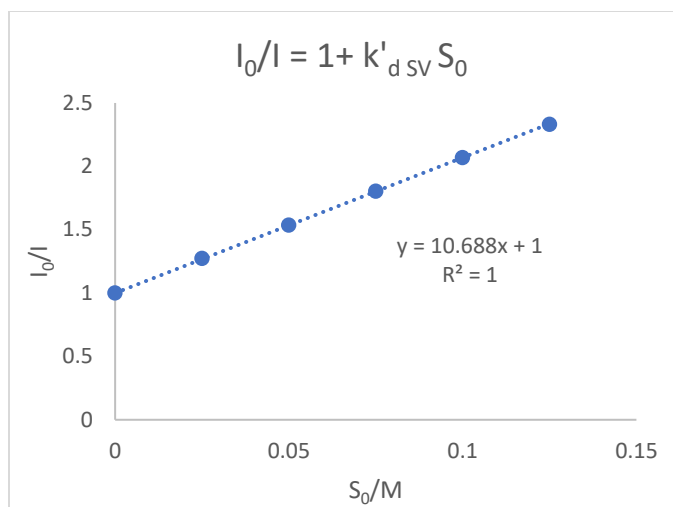

**Figure S6.2.3.** Stern-Volmer plot of luminescence data of non-PCET quenching by ketone alone

$I_0$  was extrapolated from the five data points.

$$k'_{dSV} = 10.7$$

### 6.2.3.1 Reductant 8 Experiment 1

**Table S6.2.3.1.**  $S_0$  fixed at 0.025M,  $A_0$  varied from 0.0004 to 0.0025M

| $A_0/M$ | $S_0 A_0/M^2$ | I/au 1 | I/au 2 | I/au 3 | I/au avg. | $I_0/I$  |
|---------|---------------|--------|--------|--------|-----------|----------|
| 0       | 0             |        |        |        |           | 1        |
| 0.0004  | 0.00001       | 369    | 369    | 369    | 369       | 1.236249 |
| 0.0008  | 0.00002       | 304    | 304    | 304    | 304       | 1.503289 |
| 0.0012  | 0.00003       | 262    | 265    | 267    | 264.6667  | 1.7267   |
| 0.0016  | 0.00004       | 229    | 231    | 230    | 230       | 1.984081 |
| 0.002   | 0.00005       | 203    | 203    | 203    | 203       | 2.251232 |
| 0.0025  | 0.00006       | 177    | 177    | 177    | 177       | 2.581921 |

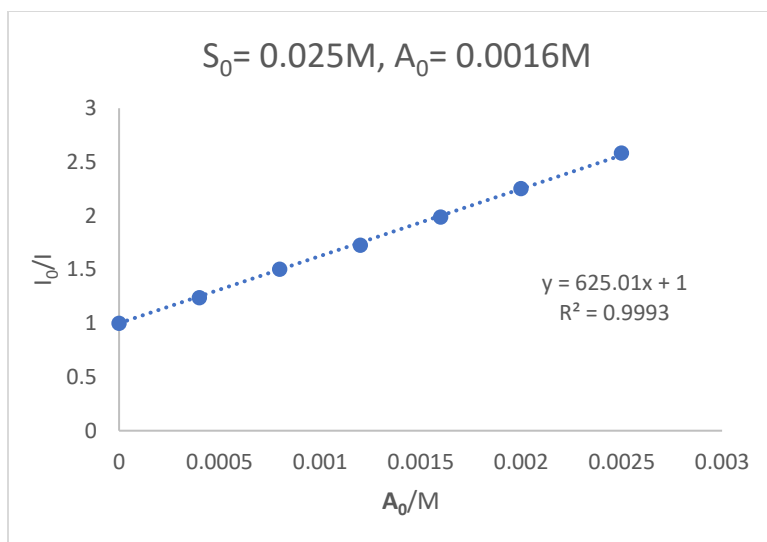

**Figure S6.2.3.1.** Stern-Volmer plot of luminescence data in **Table S6.2.3.1.**

$I_0$  was extrapolated from the six data points.

$$\frac{k''_{SV} + k_{obs}\tau_0 S_0}{1 + k'_{dSV} S_0} = 625$$

$$k''_{SV} + k_{obs}\tau_0 S_0 = 625 \times (1 + 10.7 \times 0.025) = 792.2$$

$$37.2 + 0.025 k_{obs}\tau_0 = 792.2$$

$$k_{obs}\tau_0 = 30200$$

Substitute  $S_0 = 0.025$ ,  $A_0 = 0.0016$ ,  $K_A = 2.6$ ,  $k_{obs}\tau_0 = 30200$  into the equation

$$S_0 + A_0 = \frac{S_0 A_0 k_{obs}\tau_0}{k_{PCET}\tau_0} + \frac{k_{PCET}\tau_0}{k_{obs}\tau_0} - \frac{1}{K_A}$$

$$k_{PCET}\tau_0 = 12415$$

6.2.3.2. Reductant 8 Experiment 2

Table S6.2.3.2.  $A_0$  fixed at 0.0002M,  $S_0$  varied from 0.00625 to 0.0375M

| $S_0/M$ | $S_0A_0/M^2$ | I/au 1 | I/au 2 | I/au 3 | I/au avg. | $I_0/I$  |
|---------|--------------|--------|--------|--------|-----------|----------|
| 0       | 0            |        |        |        |           | 1        |
| 0.00625 | 0.0000125    | 394    | 394    | 395    | 394.3333  | 1.468301 |
| 0.0125  | 0.000025     | 304    | 302    | 302    | 302.6667  | 1.912996 |
| 0.01875 | 0.0000375    | 248    | 248    | 248    | 248       | 2.334677 |
| 0.025   | 0.00005      | 208    | 205    | 208    | 207       | 2.797101 |
| 0.03125 | 0.0000625    | 180    | 180    | 178    | 179.3333  | 3.228625 |
| 0.0375  | 0.000075     | 154    | 154    | 156    | 154.6667  | 3.743534 |

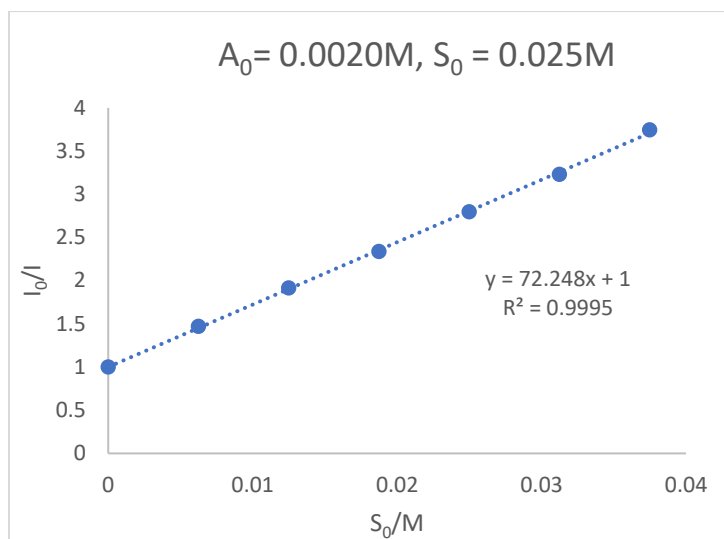

Figure S6.2.3.2. Stern-Volmer plot of luminescence data in Table S6.2.3.2.

$I_0$  was extrapolated from the six data points.

$$\frac{k''_{SV} + k_{obs}\tau_0 A_0}{1 + k'_{dSV} A_0} = 72.2$$

$$k''_{SV} + k_{obs}\tau_0 A_0 = 72.2 \times (1 + 37.2 \times 0.002) = 77.4$$

$$10.7 + 0.002 k_{obs}\tau_0 = 77.4 \quad k_{obs}\tau_0 = 33330$$

Substitute  $S_0 = 0.025$ ,  $A_0 = 0.002$ ,  $K_A = 2.6$ ,  $k_{obs}\tau_0 = 33330$  into the equation

$$S_0 + A_0 = \frac{S_0 A_0 k_{obs}\tau_0}{k_{PCET}\tau_0} + \frac{k_{PCET}\tau_0}{k_{obs}\tau_0} - \frac{1}{K_A}$$

$$k_{\text{PCET}}\tau_0 = 13715$$

$$k_{\text{PCET}}\tau_0 \text{ average} = (12415+13715)/2 = 13065 \pm 650$$

$$\ln[k_{\text{PCET}}(\text{M}^{-1}\text{s}^{-1})] = \ln[k_{\text{PCET}}\tau_0/\tau_0] = 22.82$$

$$\tau_0 = 1.61\mu\text{s}$$

$$\text{error of } \ln[k_{\text{PCET}}(\text{M}^{-1}\text{s}^{-1})] = 0.05$$

**Table S6. Kinetic and H-bonding equilibrium data for ketone 10 and 11 MS-PCET reactions**

| ketone | acid                      | reductant | BDFE <sub>O-H</sub><br>(kcal/mol) | 'BDFE' - BDFE <sub>O-H</sub><br>(kcal/mol) | K <sub>A</sub> (M <sup>-1</sup> ) | ΔG <sup>o</sup> <sub>H-bond</sub><br>(kcal/mol) | ΔG <sup>o</sup> <sub>PCET</sub><br>(kcal/mol) | k <sub>PCET</sub> (M <sup>-1</sup> s <sup>-1</sup> ) |
|--------|---------------------------|-----------|-----------------------------------|--------------------------------------------|-----------------------------------|-------------------------------------------------|-----------------------------------------------|------------------------------------------------------|
| 10     | (PhO) <sub>2</sub> P(O)OH | 7         | 27.1                              | 2.59                                       | 3.9                               | -0.81                                           | 3.4                                           | 4.7 × 10 <sup>7</sup>                                |
| 10     | (PhO) <sub>2</sub> P(O)OH | 6         | 27.1                              | -2.31                                      | 3.9                               | -0.81                                           | -1.5                                          | 3.4 × 10 <sup>8</sup>                                |
| 10     | (PhO) <sub>2</sub> P(O)OH | 9         | 27.1                              | -4.11                                      | 3.9                               | -0.81                                           | -3.3                                          | 8.5 × 10 <sup>8</sup>                                |
| 10     | (PhO) <sub>2</sub> P(O)OH | 8         | 27.1                              | -5.71                                      | 3.9                               | -0.81                                           | -4.9                                          | 2.4 × 10 <sup>9</sup>                                |
| 11     | (PhO) <sub>2</sub> P(O)OH | 6         | 25.2                              | -0.26                                      | 2.6                               | -0.56                                           | 0.3                                           | 6.1 × 10 <sup>8</sup>                                |
| 11     | (PhO) <sub>2</sub> P(O)OH | 9         | 25.2                              | -2.16                                      | 2.6                               | -0.56                                           | -1.6                                          | 2.6 × 10 <sup>9</sup>                                |
| 11     | (PhO) <sub>2</sub> P(O)OH | 8         | 25.2                              | -3.76                                      | 2.6                               | -0.56                                           | -3.2                                          | 7.9 × 10 <sup>9</sup>                                |

## 7. Miscellaneous Rate-Driving Force Correlation Plots

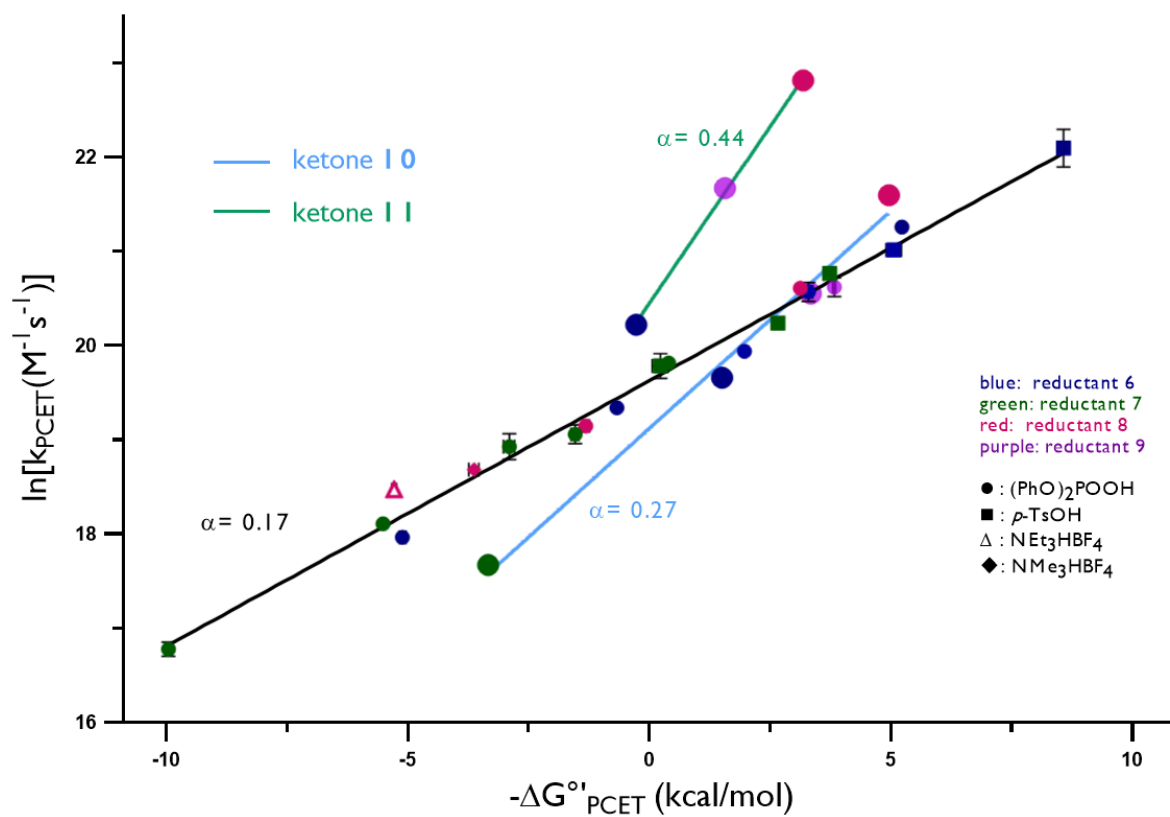

**Figure S7.1.** Superimposed plot of rate-driving force relationship for the data presented in Table S5 and S6

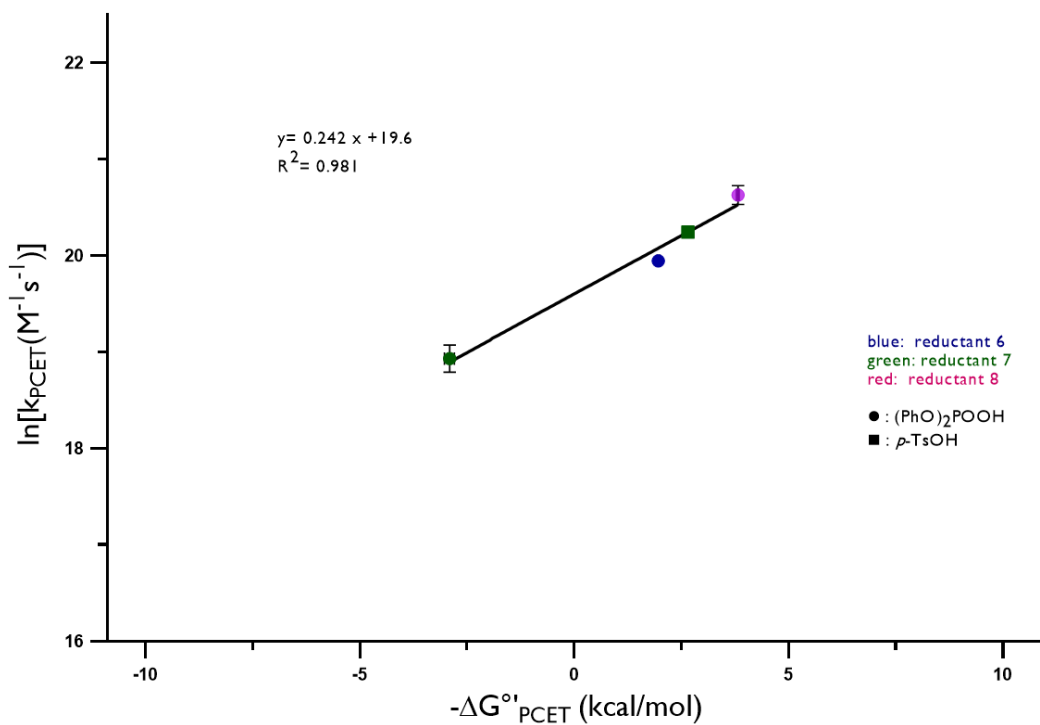

**Figure S7.2.** Plot of rate-driving force relationship for data of ketone **1** presented in Table S5

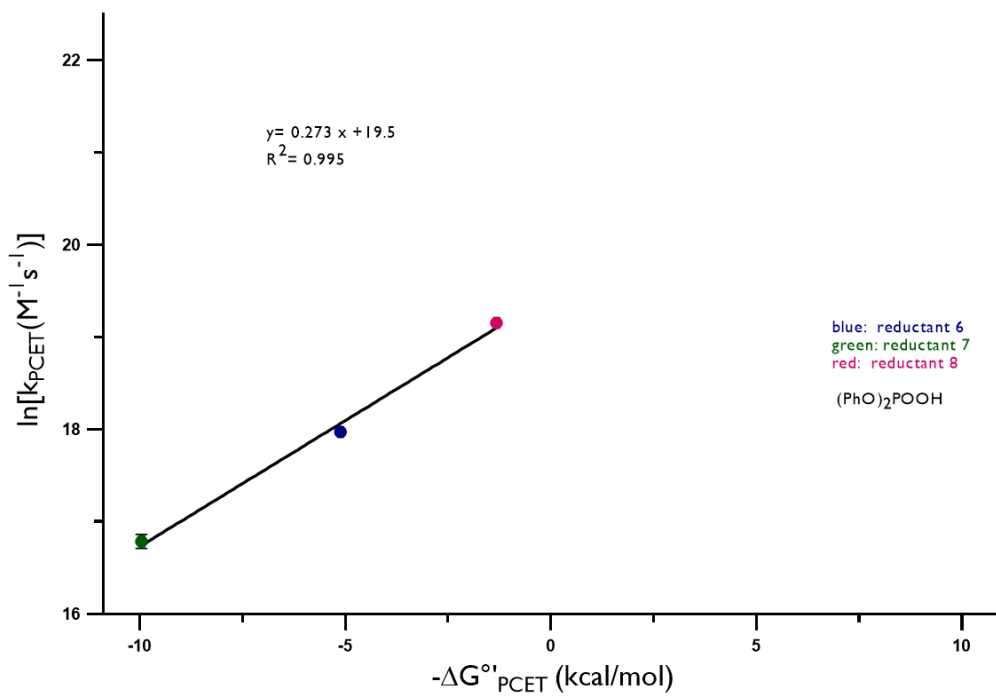

**Figure S7.3.** Plot of rate-driving force relationship for data of ketone **2** with  $(\text{PhO})_2\text{POOH}$  presented in Table S5



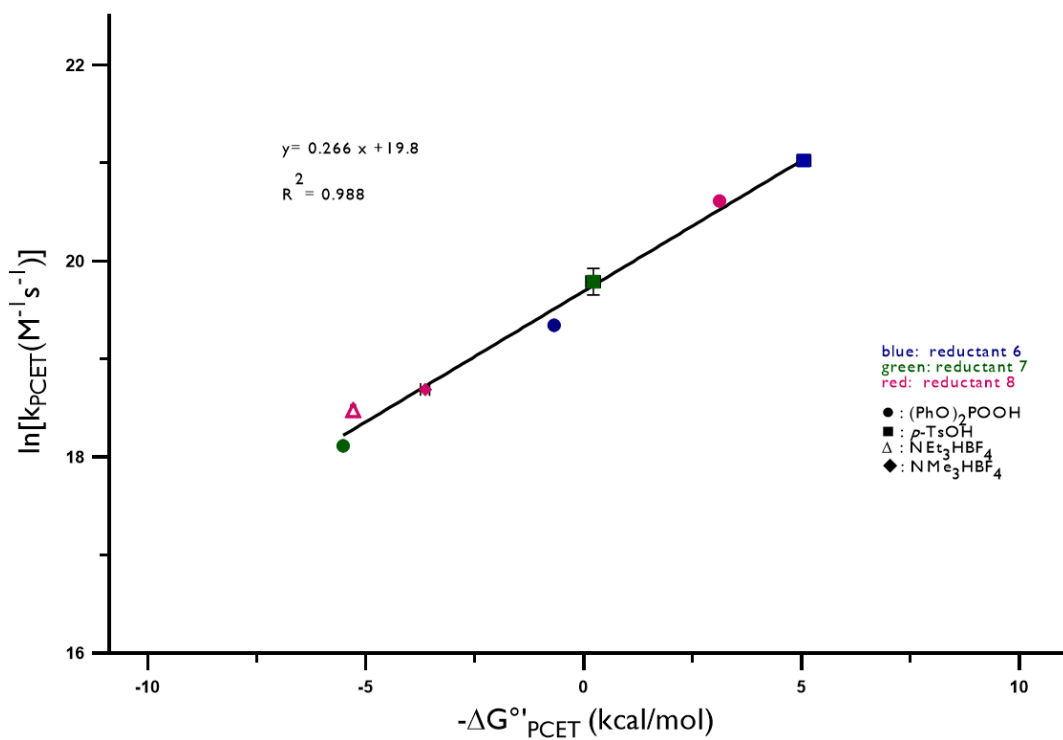

Figure S7.4. Plot of rate-driving force relationship for data of ketone 3 presented in Table S5

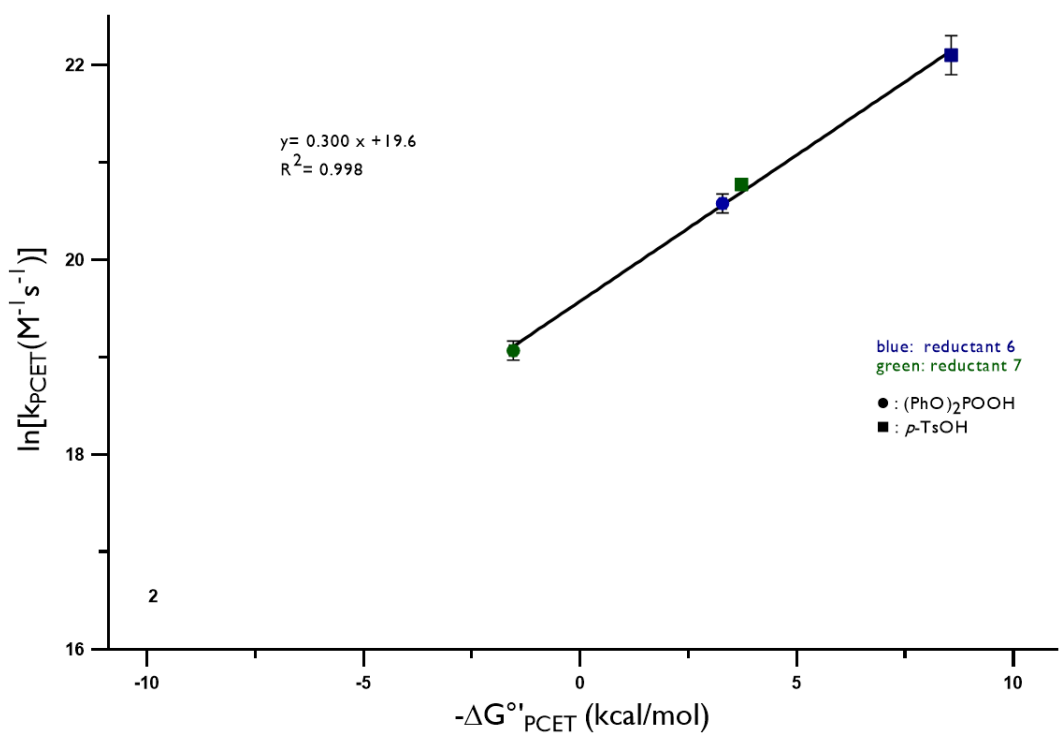

Figure S7.5. Plot of rate-driving force relationship for data of ketone 5 presented in Table S5

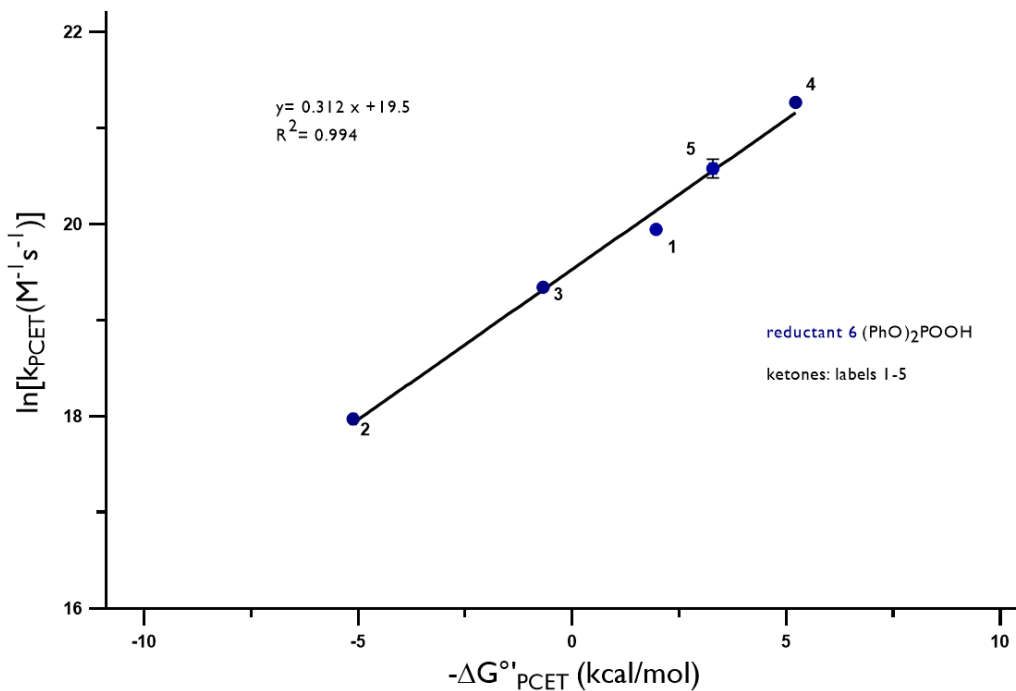

**Figure S7.6.** Plot of rate-driving force relationship for data of reductant 6 with (PhO)<sub>2</sub>POOH presented in Table S5

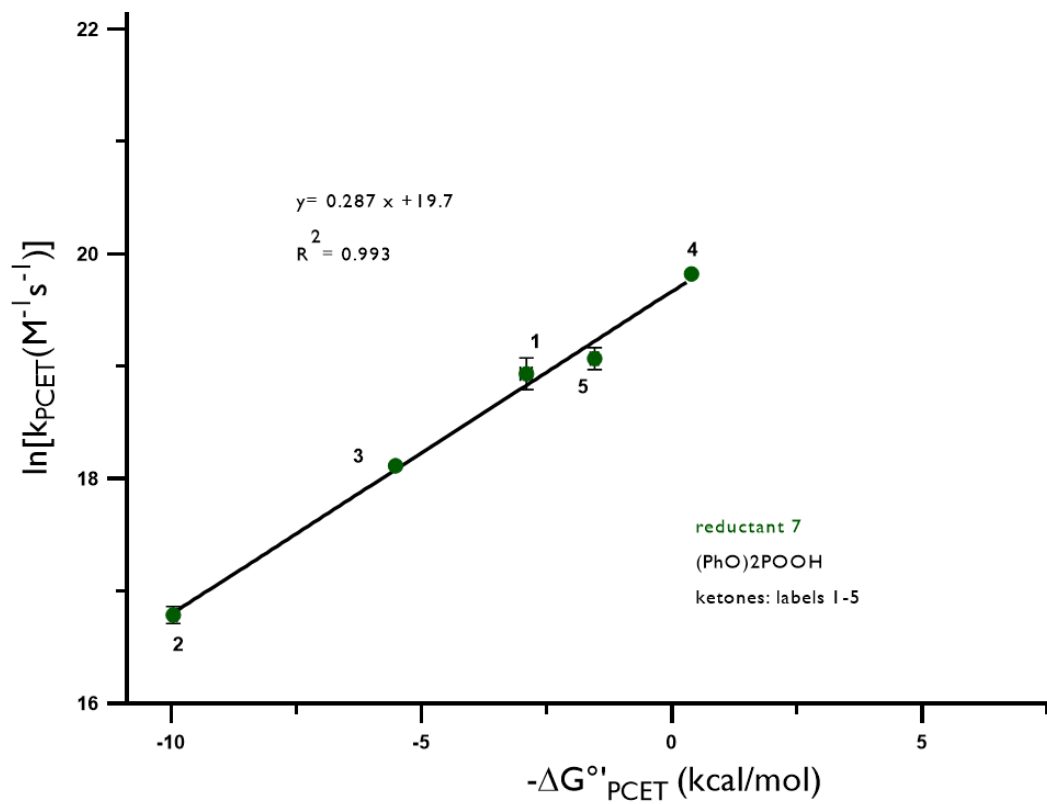

**Figure S7.7.** Plot of rate-driving force relationship for data of reductant 7 with (PhO)<sub>2</sub>POOH presented in Table S5

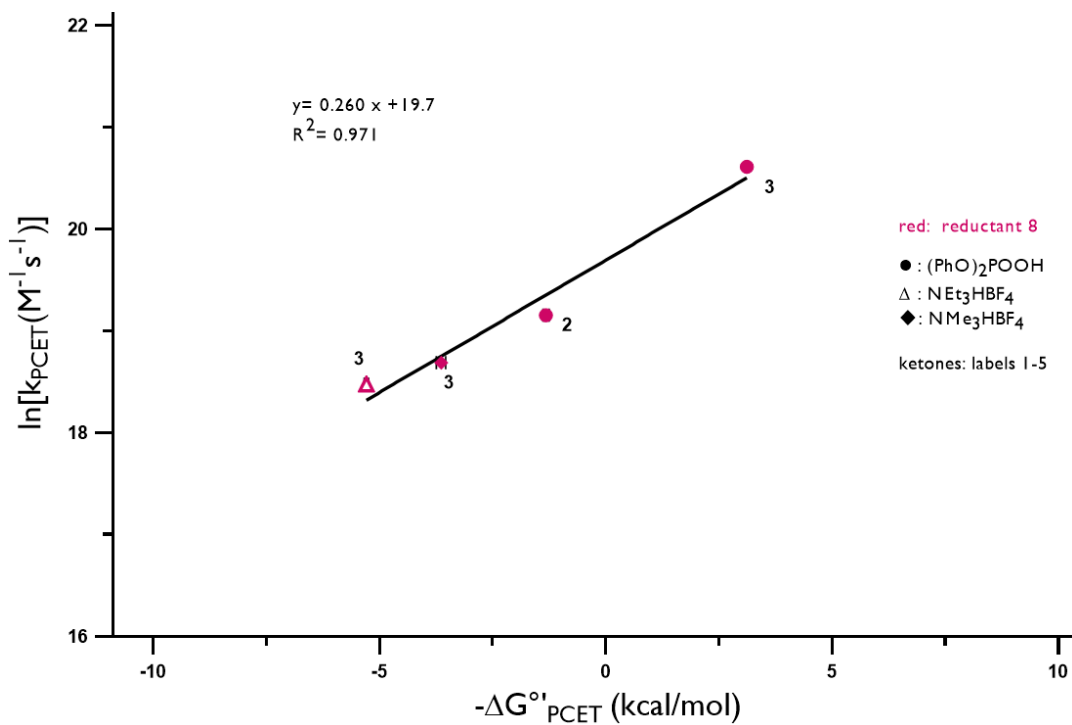

Figure S7.8. Plot of rate-driving force relationship for data of reductant 8 presented in Table S5

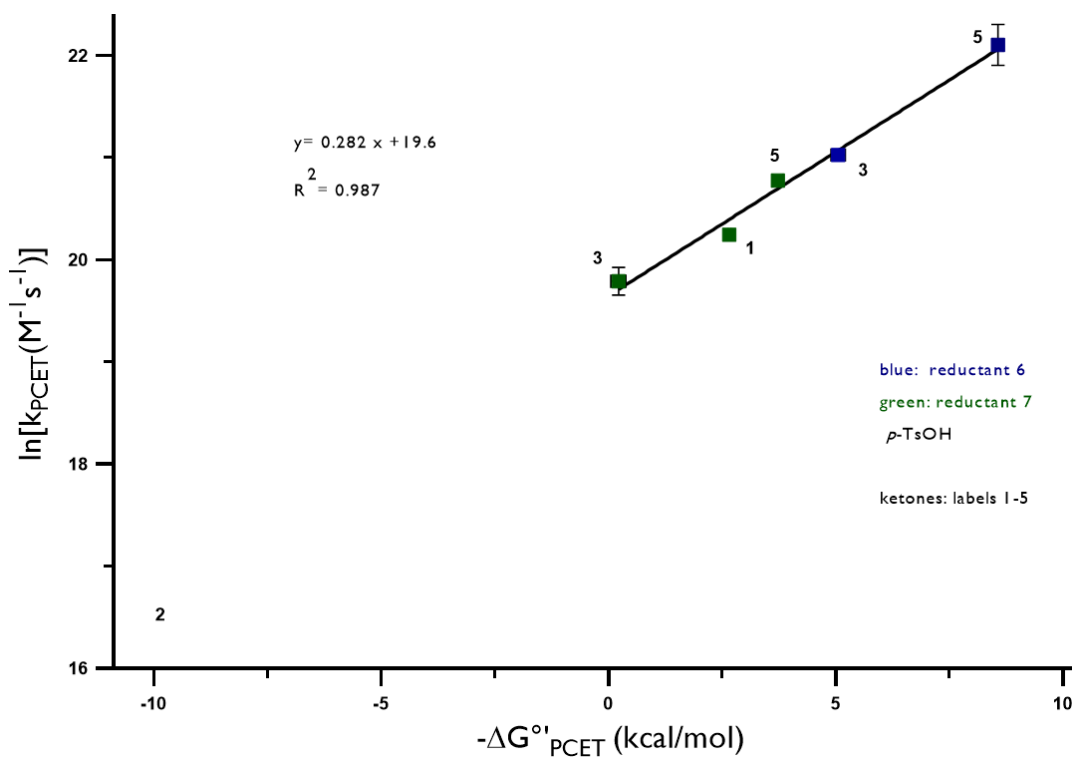

Figure S7.9. Plot of rate-driving force relationship for data with  $(PhO)_2POOH$  presented in Table S5

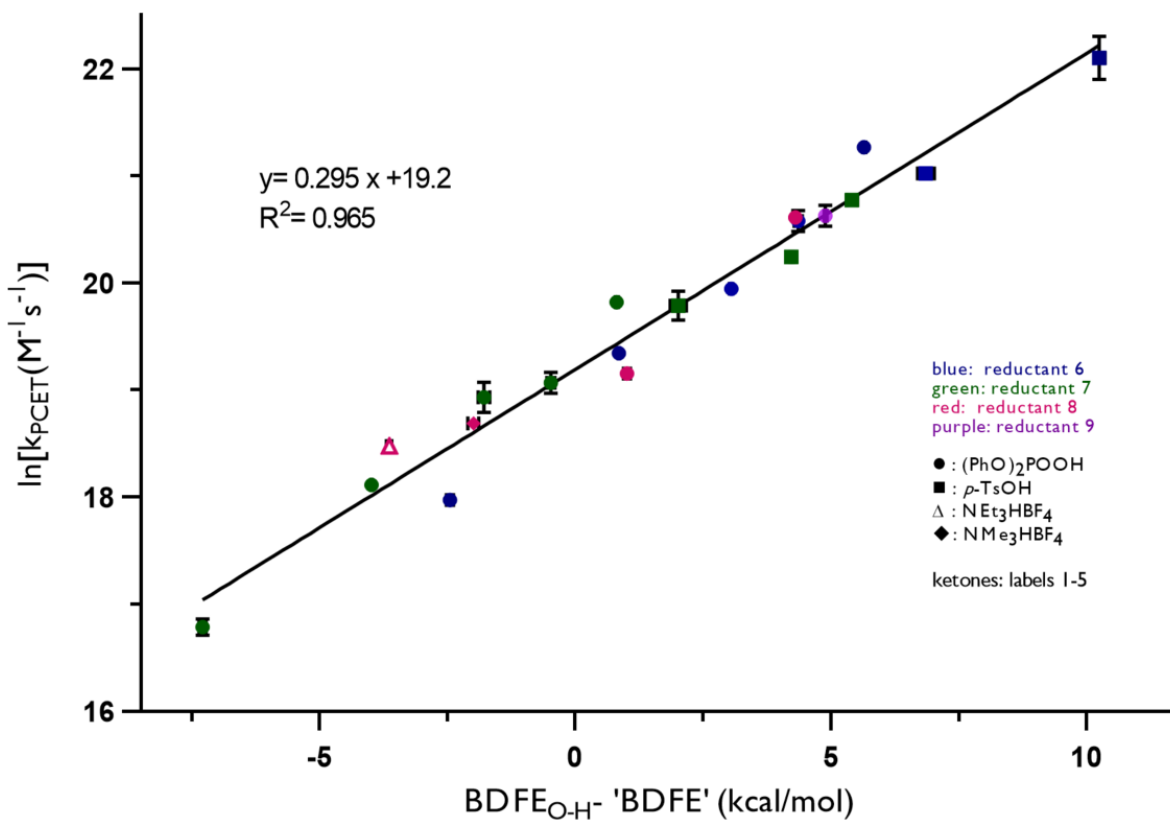

**Figure S.7.10.** Rate-driving force plot that excludes any energetic contribution from either the precursor ( $K_A$ ) or successor H-bonding to the overall driving force.

## 8. H/D Kinetic Isotope Effects (KIE)

The H/D equilibrium isotope effect was assumed to be unity.  $(\text{PhO})_2\text{P}(\text{O})\text{OH}$  or  $(\text{PhO})_2\text{P}(\text{O})\text{OD}$ , and photoreductant **6** were used for ketone **1**, **10** and **11**. The H/D KIE value for acetophenone is taken from our previous study.<sup>13</sup>

### 8.1. KIE for ketone **10**

Trial 1

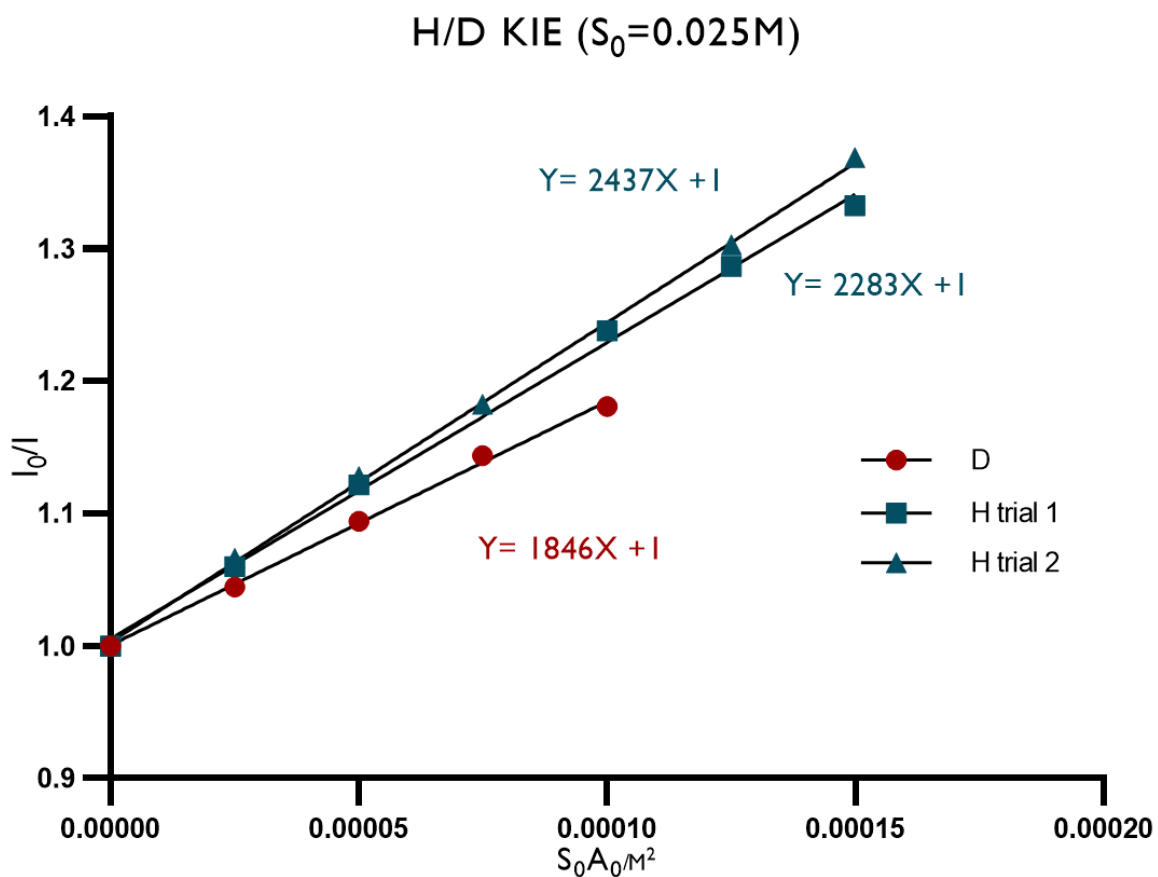

**Figure S8.1.1.** Superimposed Stern-Volmer plot of luminescence data of quenching by ketone **10** and  $(\text{PhO})_2\text{P}(\text{O})\text{OD}$  (or  $(\text{PhO})_2\text{P}(\text{O})\text{OH}$ ).  $S_0$  fixed at 0.025M,  $A_0$  varied from 0.001 to 0.004M for  $(\text{PhO})_2\text{P}(\text{O})\text{OD}$  and varied from 0.001 to 0.006M for  $(\text{PhO})_2\text{P}(\text{O})\text{OH}$

$$k_H/k_D = 2320 \text{ (from 6.1.1.1) } / 1846 = 1.26$$

Trial 2

### H/D KIE ( $S_0=0.050M$ )

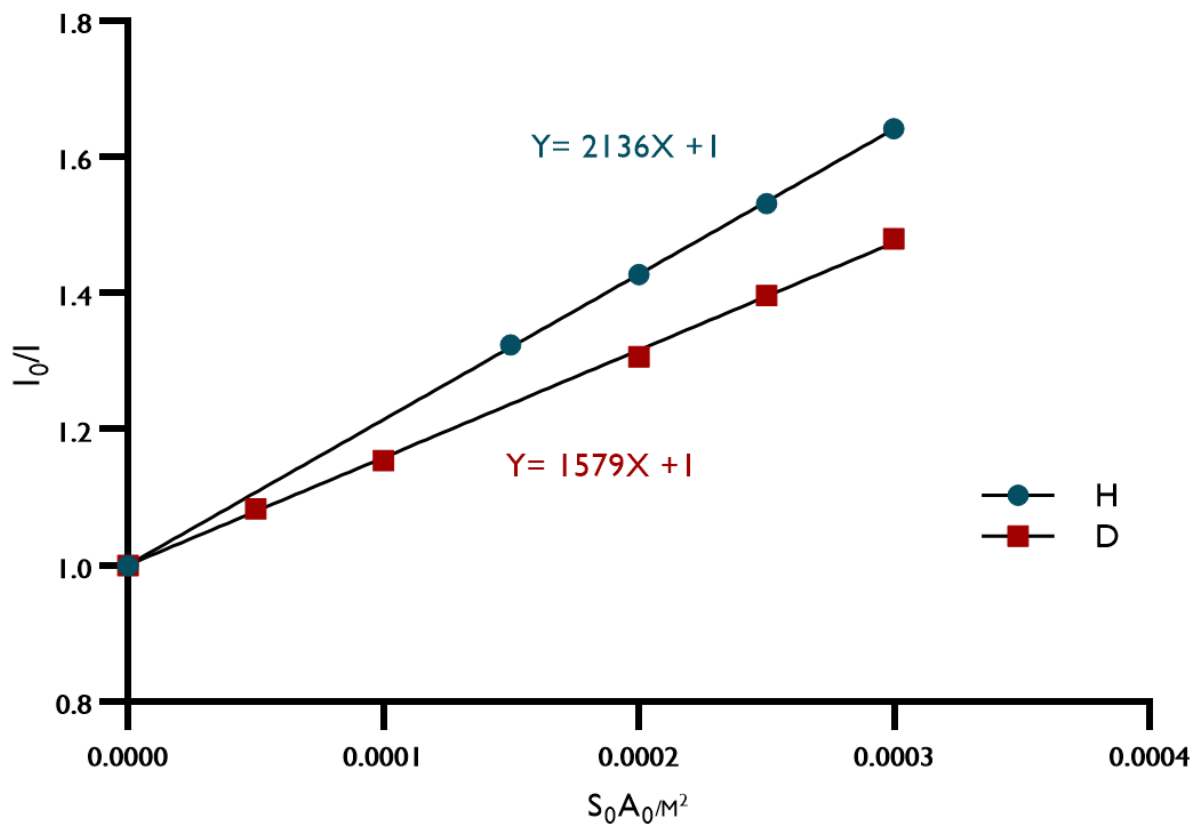

**Figure S8.1.2.** Superimposed Stern-Volmer plot of luminescence data of quenching by ketone **10** and  $(PhO)_2P(O)OD$  (or  $(PhO)_2P(O)OH$ ).  $S_0$  fixed at 0.05M,  $A_0$  varied from 0.001 to 0.006M

$$k_H/k_D = 2136 \text{ (from 6.1.1.2)} / 1579 = 1.35$$

$$\text{KIE (ketone 10)} = (1.26+1.35)/2 = 1.30 \pm 0.05$$

## 8.2. KIE for ketone **11**

Protiated reference

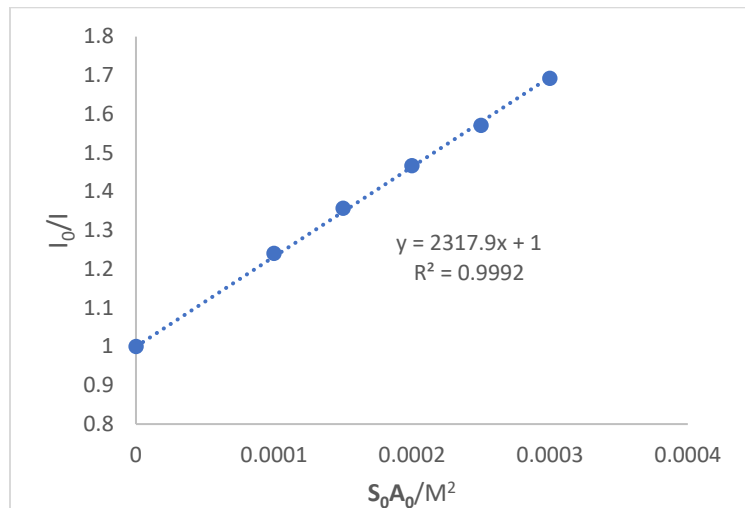

**Figure S8.2.1.** Stern-Volmer plot of luminescence data of quenching by ketone **11** and  $(\text{PhO})_2\text{P}(\text{O})\text{OH}$ . [acid] fixed at 0.004M, [acid] varied from 0.0125 to 0.075M

Trial 1

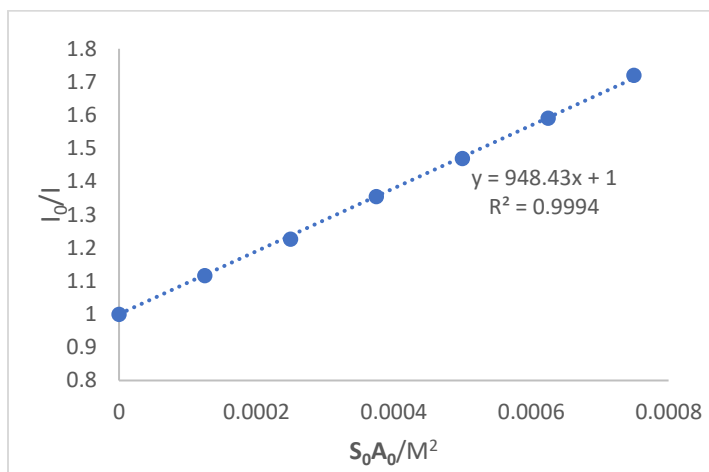

**Figure S8.2.2.** Stern-Volmer plot of luminescence data of quenching by ketone **11** and  $(\text{PhO})_2\text{P}(\text{O})\text{OD}$ . [acid] fixed at 0.01M, [acid] varied from 0.0125 to 0.075M

$$k_H/k_D = 2318 / 948 = 2.45$$

Trial 2

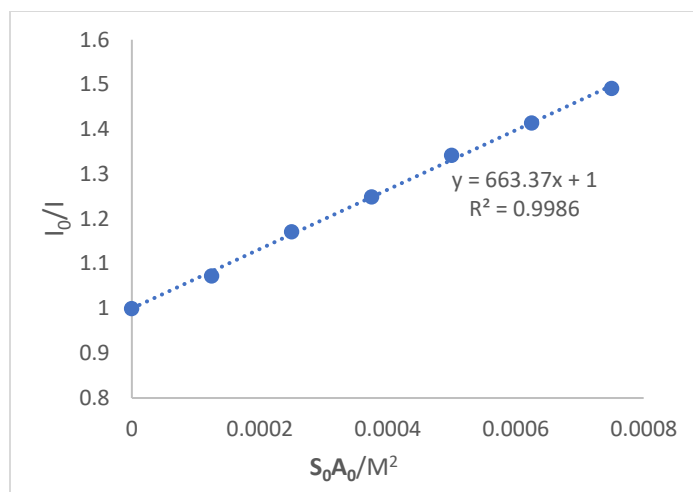

**Figure S8.2.3.** Stern-Volmer plot of luminescence data of quenching by ketone **11** and  $(\text{PhO})_2\text{P}(\text{O})\text{OD}$ . [acid] fixed at 0.010M, [acid] varied from 0.0125 to 0.075M

$$k_H/k_D = 2318 / 663 = 3.50$$

$$\text{KIE (ketone 11)} = (2.45+3.50)/2 = 3.0 \pm 0.5$$

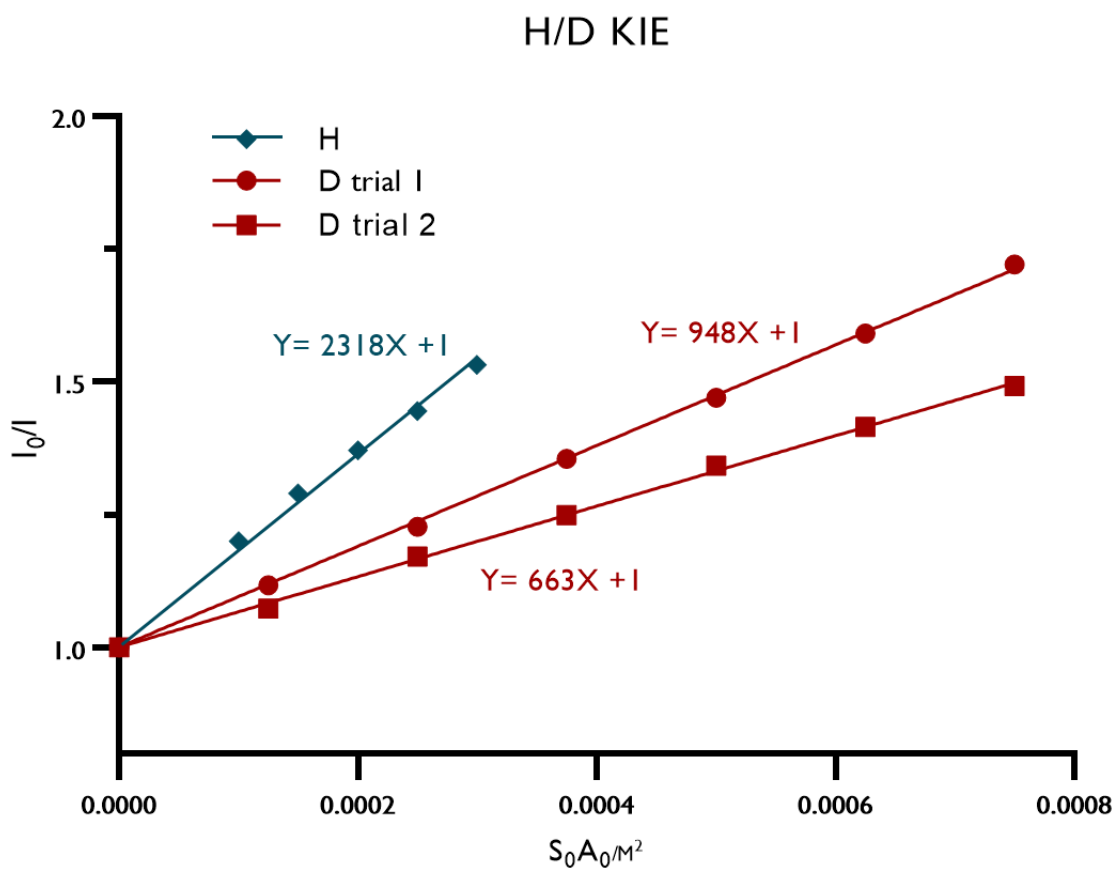

**Figure S8.2.4.** Superimposed plot of Figure S8.2.1-3.



## 9. References

- (1) Perrin, D. D.; Amarego, W. L. F. *Purification of Laboratory Chemicals*. Pergamon, Press, Oxford, ed.3, **1988**.
- (2) Pangborn, A. B., Giardello, M. A., Grubbs, R. H., Rosen, R. K., & Timmers, F. J. "Safe and convenient procedure for solvent purification." *Organometallics* **1996**, *15*, 1518.
- (3) Gaussian 09, M. J. Frisch, G. W. Trucks, H. B. Schlegel, G. E. Scuseria, M. A. Robb, J. R. Cheeseman, G. Scalmani, V. Barone, B. Mennucci, G. A. Petersson, H. Nakatsuji, M. Caricato, X. Li, H. P. Hratchian, A. F. Izmaylov, J. Bloino, G. Zheng, J. L. Sonnenberg, M. Hada, M. Ehara, K. Toyota, R. Fukuda, J. Hasegawa, M. Ishida, T. Nakajima, Y. Honda, O. Kitao, H. Nakai, T. Vreven, J. A. Montgomery, Jr., J. E. Peralta, F. Ogliaro, M. Bearpark, J. J. Heyd, E. Brothers, K. N. Kudin, V. N. Staroverov, R. Kobayashi, J. Normand, K. Raghavachari, A. Rendell, J. C. Burant, S. S. Iyengar, J. Tomasi, M. Cossi, N. Rega, J. M. Millam, M. Klene, J. E. Knox, J. B. Cross, V. Bakken, C. Adamo, J. Jaramillo, R. Gomperts, R. E. Stratmann, O. Yazyev, A. J. Austin, R. Cammi, C. Pomelli, J. W. Ochterski, R. L. Martin, K. Morokuma, V. G. Zakrzewski, G. A. Voth, P. Salvador, J. J. Dannenberg, S. Dapprich, A. D. Daniels, O. Farkas, J. B. Foresman, J. V. Ortiz, J. Cioslowski, D. J. Fox, Gaussian, Inc., Wallingford CT, 2009
- (4) Nomrowski, J.; Wenger, O. S. "Photoinduced PCET in ruthenium–phenol systems: thermodynamic equivalence of Uni- and bidirectional reactions" *Inorg. Chem.* **2015**, *54*, 3680
- (5) Biczók, L.; Gupta, N.; Linschitz, H. "Coupled electron-proton transfer in interactions of triplet C<sub>60</sub> with hydrogen-bonded phenols: Effects of solvation, deuteration, and redox potentials" *J. Am. Chem. Soc.*, **1997**, *119*, 12601
- (6) The pK<sub>a</sub> of 13 (MeCN) reported for (PhO)<sub>2</sub>P(O)OH is an estimated value based on the pK<sub>a</sub> of BINOL-P(O)OH. Rueping, M.; Nachtsheim, B. J.; Ieawsuwan, W.; Atodiresei, I. "Modulating the acidity: highly acidic Brønsted acids in asymmetric catalysis." *Angew. Chem. Int. Ed.* **2011**, *50*, 6706
- (7) Kütt, A.; Leito, I.; Kaljurand, I.; Sooväli, L.; Vlasov, V. M.; Yagupolskii, L. M.; Koppel, I. A. "A comprehensive self-consistent spectrophotometric acidity scale of neutral Brønsted acids in acetonitrile." *J. Org. Chem.* **2006**, *71*, 2829
- (8) Kaljurand, I.; Lilleorg, R.; Murumaa, A.; Mishima, M.; Burk, P.; Koppel, I.; Koppel, I. A.; Leito, I. "The basicity of substituted N, N-dimethylanilines in solution and in the gas phase." *J. Phys. Org. Chem.* **2013**, *26*, 171
- (9) Kaljurand, I.; Kütt, A.; Sooväli, L.; Rodima, T.; Mäemets, V.; Leito, I.; Koppel, I. A. "Extension of the self-consistent spectrophotometric basicity scale in acetonitrile to a full span of 28 pK<sub>a</sub> units: unification of different basicity scales." *J. Org. Chem.* **2005**, *70*, 1019
- (10) Breslow, R.; Chu, W. "Thermodynamic Determination of pK<sub>a</sub>'s of Weak Hydrocarbon Acids Using Electrochemical Reduction Data." *J. Am. Chem. Soc.* **1973**, *95*, 411
- (11) Bordwell, F. G.; Cheng, J. P.; Harrelson, J. A. "Homolytic bond dissociation energies in solution from equilibrium acidity and electrochemical data." *J. Am. Chem. Soc.* **1988**, *110*, 1229
- (12) Warren, J. J.; Tronic, T. A.; Mayer, J. M. "Thermochemistry of proton-coupled electron transfer reagents and its implications." *Chem. Rev.* **2010**, *110*, 6961
- (13) Tarantino, K. T.; Liu, P.; Knowles, R. R. "Catalytic Ketyl-Olefin Cyclizations Enabled by Proton-Coupled Electron Transfer." *J. Am. Chem. Soc.* **2013**, *135*, 10022
